1 **Globally defining the effects of mutations in a picornavirus capsid**

2

3

4 Florian Mattenberger<sup>1</sup>, Victor Latorre<sup>1</sup>, Omer Tirosh<sup>2</sup>, Adi Stern<sup>2</sup>, Ron Geller<sup>1\*</sup>

5

6 <sup>1</sup>Institute for Integrative Systems Biology, I<sup>2</sup>SysBio (Universitat de València-CSIC), C. Catedràtic José

7 Beltrán 2, Paterna, 46980, Spain.

8 <sup>2</sup>The Shmunis School of Biomedicine and Cancer Research, Tel-Aviv University, Tel-Aviv, Israel

9

10 \*Corresponding author: Ron Geller, Institute for Integrative Systems Biology, I<sup>2</sup>SysBio (Universitat de

11 València-CSIC), C. Catedràtic José Beltrán 2, Paterna, 46980, Spain. Email: ron.geller@uv.es

12

13 **ABSTRACT**

14 The capsids of non-enveloped viruses are highly multimeric and multifunctional protein assemblies that  
15 protect the viral genome between infection cycles, dictate host and cell tropism, and mediate evasion of  
16 humoral immune responses. As such, capsids play key roles in viral biology and pathogenesis. Despite  
17 their importance, a comprehensive understanding of how mutations affect viral fitness across different  
18 structural and functional attributes of the capsid is lacking. To address this limitation, we globally define  
19 the effects of mutations in the capsid of a human picornavirus, generating a comprehensive dataset  
20 encompassing >90% of all possible single amino acid mutations. Moreover, we use this information to  
21 identify structural and sequence determinants that accurately predict mutational fitness effects, refine  
22 evolutionary analyses, and define the sequence specificity of key capsid encoded motifs. Finally,  
23 capitalizing on the sequence requirements identified in our dataset for capsid encoded protease cleavage  
24 sites, we implement and validate a bioinformatic approach for identifying novel host proteins targeted by  
25 viral proteases. Our findings present the most comprehensive investigation of mutational fitness effects  
26 in a picornavirus capsid to date and illuminate important aspects of viral biology, evolution, and host  
27 interactions.

28

29

30 **Keywords:** Deep mutational scanning; mutational fitness effects; capsid; picornavirus; viral protease;

31

32

## 33 INTRODUCTION

34 The capsids of non-enveloped viruses are among the most complex of any viral protein. These highly  
35 multimeric structures must correctly assemble around the genome from numerous subunits, at times  
36 numbering in the hundreds, while avoiding aggregation<sup>1-3</sup>. Moreover, the assembled structure must be  
37 both sufficiently stable to protect the viral genome during its transition between cells yet readily  
38 disassemble upon entry to initiate subsequent infections. For these functions to be achieved, viral capsids  
39 must encode the information for interacting with numerous cellular factors that are required to correctly  
40 fold and assemble around the genome<sup>4-8</sup>. Viral capsids also play key roles in pathogenesis, dictating host  
41 and cell tropism by encoding the determinants for binding cellular receptors<sup>9,10</sup> and mediating escape  
42 from humoral immune responses<sup>11,12</sup>. As a result, viral capsids show the highest evolutionary rates among  
43 viral proteins.

44

45 The picornaviruses constitute a large group of single-stranded, positive-sense RNA viruses and include  
46 several pathogens of significant medical and economic impact<sup>13</sup>. Their relative simplicity and ease of  
47 culture have made picornaviruses important models for understanding virus biology. Among the many  
48 breakthroughs achieved with these viruses was the determination of the first high-resolution structure of  
49 the capsid of an animal virus, making the picornavirus capsid the prototypical non-enveloped, icosahedral  
50 viral capsid<sup>13</sup>. Picornavirus capsid genesis initiates with the co-translational release of the P1 capsid  
51 precursor protein from the viral polyprotein via the proteolytic activity of the viral encoded 2A protease  
52<sup>7,13</sup>. Subsequently, the viral encoded 3CD protease (3CD<sup>pro</sup>) cleaves the P1 capsid precursor to liberate  
53 three capsid proteins (VP0, VP3, and VP1), generating the capsid protomer. Five protomers then assemble  
54 to form the pentamer, twelve of which assemble around the viral genome to yield the virion. Finally, in  
55 some picornaviruses, VP0 is further cleaved into two subunits, VP4 and VP2, following genomic

56    encapsidation to generate the infectious, 240 subunit particle <sup>7,13</sup>. Work over the years has identified  
57    numerous host factors that help support capsid formation <sup>4,5,14–16</sup>, defined antibody neutralization sites <sup>11</sup>,  
58    and identified numerous host receptors for many members of this viral family <sup>9</sup>.

59

60    Despite significant progress in understanding the structure and function of picornavirus capsids, a  
61    comprehensive understanding of how mutations affect viral fitness across different structural and  
62    functional attributes is lacking. To address this, we perform a comprehensive analysis of mutational fitness  
63    effects (MFE) across the complete capsid region of the human picornavirus coxsackievirus B3 (CVB3),  
64    analyzing >90% of all possible single amino acid mutations. Furthermore, using this data, we develop  
65    models to predict the effect of mutations with high accuracy from available sequence and structural  
66    information, improve evolutionary analyses of CVB3, and define the sequence preferences of several viral  
67    encoded motifs. Finally, we use the information obtained in our dataset for the sequence requirements  
68    of capsid encoded 3CD protease cleavage sites to identify host targets of this viral protease. Overall, our  
69    data comprise the most comprehensive survey of MFE effects in a picornavirus capsid to date and provide  
70    important insights into virus biology, evolution, and interaction with the host.

71

## 72 RESULTS

### 73 Deep mutational scanning of a CVB3 capsid

74 To generate CVB3 libraries encoding a large amount of diversity in the capsid region, we used a codon-  
75 level PCR mutagenesis method <sup>17</sup>. The mutagenesis protocol was performed on the capsid precursor  
76 region P1 in triplicate to generate three independent mutagenized libraries (Mut Library 1-3; Fig. 1A).  
77 From these, three independent viral populations (Mut Virus 1-3) were derived by electroporation of in  
78 vitro transcribed viral RNA into HeLa-H1 cells (Fig. 1A). High-fidelity next-generation sequencing <sup>18</sup> was  
79 then used to analyze the mutagenized libraries and resulting viruses, unmutagenized virus populations  
80 (WT virus 1-2), as well as controls for errors occurring during PCR (PCR) and reverse transcription (RT-  
81 PCR). High coverage was obtained for all samples ( $>10^6$  per codon across all experimental conditions and  
82  $>6.5 \times 10^5$  for the controls; Supplementary Table S2). Due to the high rate of single mutations within codons  
83 observed in the RT-PCR control compared to the mutagenized virus populations (Supplementary Table  
84 S2), all single mutants were omitted from our analysis to increase the signal-to-noise ratio. While this  
85 resulted in an inability to analyze 83.4% of synonymous codons in the capsid region (1746/2094) only 2.8%  
86 of non-synonymous mutations were lost to analysis (458/16,169). Upon removing single mutations within  
87 codons, we obtained a large signal-to-noise ratio in the average mutation rate of 510x (range 449–572)  
88 and 245x (range 174–285) for the mutagenized libraries and viruses, respectively, compared to their error  
89 controls (Fig. 1B and Supplementary Table S2). On average, 0.9 (range 0.8–1.02) codon mutations were  
90 observed per genome, which was in agreement with Sanger sequencing of 59 clones (range 18–23 per  
91 library; Fig. S1 and Supplementary Table S3). As expected, the rate of stop codons, which should be  
92 invariably lethal in the CVB3 capsid, decreased significantly following growth in cells to  $<0.5\%$  of that  
93 observed in the corresponding mutagenized libraries ( $p < 0.005$  by paired t-test on log-transformed data;  
94 Supplementary Table S2). No major bias was observed in the position within a codon where mutations  
95 were observed (Fig. S2A) nor in the type of mutation (Fig. S2B), except for the WT virus, which had a high

96 rate of A to G transitions in the two independent replicates analyzed. Of all 16,169 possible amino acid  
97 mutations in the capsid region (851 AA x 19 AA mutation = 16,169), a total of 14,839 amino acid mutations  
98 were commonly observed in all three mutagenized libraries, representing a 91.8% of all possible amino  
99 acid mutations in the capsid region, allowing us to globally assess the effects of the vast majority of amino  
100 acid mutations on the capsid (Fig. 1C).

101

### 102 **Mutational fitness effects across the CVB3 capsid**

103 We next derived the mutational fitness effects (MFE) of each observed mutation by examining how its  
104 frequency changed relative to that of the WT sequence following growth in cells. The preferences for the  
105 different amino acids at each position (amino acid preferences<sup>19</sup>) showed a high correlation between  
106 biological replicates (Spearman's  $\rho > 0.83$ ; Supplementary Figure S3 and Supplementary Table S4 MFE).  
107 Overall, most mutations in the capsid were deleterious, with only 1.2% of mutations increasing fitness  
108 relative to the WT amino acid (Fig. 2A and Supplementary Table S4). Hotspots where mutations were  
109 tolerated were observed at several regions across the capsid (Fig. 2A). These hotspots largely overlapped  
110 with highly variable regions in natural sequences, as measured by Shannon entropy in the enterovirus B  
111 family, indicating that lab measured MFE reflect natural evolutionary processes (Fig. 2A, top). Indeed, a  
112 strong correlation was observed between MFE and sequence variability for the enterovirus B genus  
113 (Spearman's  $\rho = 0.59$ ,  $p < 10^{-16}$ ; Fig. 2B). Similarly, antibody neutralization sites overlapped with hotspots  
114 for mutations (Fig. 2A, top) and were significantly less sensitive to mutations ( $p < 10^{-16}$  by Mann-Whitney  
115 test; Fig. 2C). As expected, mutations were also less deleterious in loops compared to  $\beta$ -strands ( $p < 10^{-16}$   
116 by Kruskal-Wallis test; Fig. 2D), at surface residues compared to core residues ( $p < 10^{-16}$  by Kruskal-Wallis  
117 test; Fig. 2E), and for mutations predicted to be destabilizing ( $p < 10^{-16}$  by Mann-Whitney test; Fig. 2F) or  
118 aggregation-prone ( $p < 10^{-16}$  by Mann-Whitney test; Fig. 2G). Importantly, independent validation of the

119 MFE of 10 different mutants using a sensitive qPCR method <sup>20</sup> showed a strong correlation with the DMS  
120 results (Spearman's  $\rho = 0.9$ ,  $p < 0.001$ ; Supplementary Table S5).

121

## 122 **Prediction of MFE from available structural and sequence information**

123 As MFE correlated with natural sequence variation and different structural features of the capsid (Fig. 2),  
124 we next investigated if MFE could be predicted from available structural and sequence information. For  
125 this, we obtained a dataset of 52 parameters, including structural information derived from the crystal  
126 structure of the CVB3 capsid (PDB:4GB3), amino acid properties, natural variation in available enterovirus  
127 sequences (Shannon entropy), and predicted the effects of mutation on stability and aggregation  
128 propensity using FoldX <sup>21</sup> and TANGO <sup>22</sup>, respectively (Supplementary Table S6). We then employed a  
129 random forest algorithm to identify the parameters that can best predict MFE, limiting our analysis to  
130 sites that present in the crystal structure and where mutations were observed in at least 2 replicates to  
131 improve accuracy (total of 9,685 mutations). Overall, a model trained on 70% of the dataset was able to  
132 predict the remaining 30% of the data (2,905 mutations) with high accuracy (Spearman's  $\rho > 0.75$ ,  
133 Pearson's  $r = 0.76$ ;  $p < 10^{-16}$ ; Fig. S4A,B). Surprisingly, a random forest model trained on the top five  
134 predictors alone showed similar accuracy (Spearman's  $\rho = 0.73$ , Pearson's  $r = 0.73$ ;  $p < 10^{-16}$ ; Fig. 3B).  
135 Excluding natural sequence variation, amino acid identity, or structural attributes reduced model  
136 predictability significantly (>20%; data not shown), suggesting a combination of evolutionary, sequence,  
137 and structural information best explains MFE. Using an alternative approach, we were able to predict the  
138 data with slightly lower accuracy using a linear model with the same five predictors ( $p < 10^{-16}$ , Spearman's  
139  $\rho = 0.67$ , Pearson's  $r = 0.67$ ; Fig. S4C). Together, these results suggest that the prediction of MFE in the  
140 CVB3 capsid can be achieved at relatively high accuracy based on available structural and sequence  
141 information. Due to the high conservation of capsid structure in picornaviruses, as well as the availability

142 of numerous capsid sequences and structures, these findings are likely generalizable to related  
143 picornaviruses.

144

#### 145 **Experimentally measured MFE inform of natural evolutionary processes**

146 We next examined if our experimentally measured MFE could improve phylogenetic models of CVB3  
147 evolution by incorporating site-specific amino acid preferences using PhyDMS<sup>23</sup>. Indeed, significant  
148 improvement in model fit was observed (Table 1 PHY;  $p < 10^{-16}$  using a log-likelihood test compared to  
149 non-site-specific codon models), supporting the relevance of our results to understanding evolutionary  
150 processes in nature. Nevertheless, selection in nature was significantly more stringent than in the lab ( $\beta$   
151 = 2.18), indicating the presence of additional selection pressures. As laboratory conditions lack selection  
152 from antibodies, we used the sum of the absolute differential selection observed at each site<sup>24</sup> to examine  
153 whether known antibody neutralization sites show differential selection between the two environments  
154 (Supplementary Table S7). Indeed, antibody neutralization sites showed significantly higher differential  
155 selection values compared to other residues ( $p < 10^{-6}$  by Mann-Whitney test; Fig. 4A). Moreover, the three  
156 sites showing the strongest overall differential selection were found in known antibody neutralization  
157 sites: position 226 and 242 in the EF loop (residues 157 and 173 of VP2) and position 650 in the BC loop  
158 (residue 80 of VP1; Fig. 4B-D and Supplementary Table S7). In summary, incorporation of our  
159 experimentally derived amino acid preferences into phylogenetic analyses significantly improved model  
160 fit and identified residues in antibody neutralization sites that show differential selection, suggesting  
161 these may play important roles in immune evasion in vivo.

162

#### 163 **Insights into capsid encoded motifs: Myristoylation and protease cleavage**



164 Picornavirus capsids undergo a complex assembly path to generate the infectious particle. These include  
165 myristoylation, cleavage by the viral proteases 2A and 3CD<sup>pro</sup>, as well as interaction with cellular  
166 chaperones and glutathione<sup>4,7,14-16</sup> (Fig. 5A). Having obtained a comprehensive dataset for MFE across  
167 the capsid, we next examined the sequence requirements for several of these capsid encoded motifs.  
168 Specifically, myristoylation of the N-terminal glycine is essential for virion assembly<sup>16</sup>. In agreement with  
169 this, the N-terminal glycine in the CVB3 capsid showed the strongest average fitness cost upon mutation  
170 in the capsid (Fig. S5 and Supplementary Table S4). The remaining sites in the myristoylation motif agreed  
171 with the canonical myristoylation motif in cellular proteins (Prosite pattern PDOC00008)<sup>25</sup>, albeit with  
172 increased selectivity at three of the six positions (Fig. S5A). On the other hand, a conserved WCPRP motif  
173 in the C-terminal region of VP1 that was shown to be important for 3CD<sup>pro</sup> cleavage of the related foot  
174 and mouth disease virus capsid (FDMV; YCPRP motif)<sup>26</sup> was found to be intolerant to mutations compared  
175 to other capsid residues ( $p < 0.05$  versus all other positions by Mann-Whitney test; sites 815-819 in CVB3).  
176 Moreover, within this motif, the sites showing the highest average fitness cost in our DMS dataset were  
177 identical to analogous positions in FMDV that resulted in a loss of viability upon mutation to alanine (Fig.  
178 S5B)<sup>26</sup>, highlighting the conservation of this motif across different picornaviruses.

179

180 The viral 3C protease (3C<sup>pro</sup>) cleaves the picornavirus capsid at two conserved glutamine-glycine (QG) pairs  
181 to liberate the viral capsid proteins VP0, VP3, and VP1 (Fig. 5A). Previous work has defined the sequence  
182 specificity of several picornavirus 3C<sup>pro</sup> enzymes by examining both natural sequence variation and in vitro  
183 cleavage assays using synthetic peptides<sup>27</sup>. However, unlike other 3C<sup>pro</sup> mediated cleavage events in the  
184 viral polyprotein, the capsid is only efficiently cleaved by the precursor protein 3CD<sup>pro</sup><sup>28</sup>. To gain insights  
185 into the sequence specificity of 3CD<sup>pro</sup>, we examined the amino acid preferences for a 10 amino acid region  
186 surrounding the protease cleavage site (P5-P5'). As expected based on the known specificity of the 3C  
187 protease<sup>27</sup>, a strong preference for the presence of QG was observed at both 3CD<sup>pro</sup> cleavage sites in our

188 dataset (positions P1 and P1' in the cleavage site; Fig. 5B,C). Interestingly, significant correlation in amino  
189 acid preferences between the two cleavage sites was observed only at P1-P1' (Pearson's  $\rho > 0.99$ ,  $p < 10^{-16}$ )  
190 and P4 (Pearson's  $\rho > 0.49$ ,  $p < 0.05$ ), as was the case in the enterovirus B alignments (Pearson's  $\rho >$   
191  $0.84$  and  $p < 10^{-6}$  for positions P4, P1, and P1'; data not shown). Hence, the low agreement in amino acid  
192 preferences observed for most positions across the two 3CD<sup>pro</sup> cleavage sites suggests cleavage is strongly  
193 dictated by positions P4, P1, and P1'.

194

### 195 **Identification of 3CD<sup>pro</sup> cellular targets based on the sequence preferences of capsid encoded protease** 196 **cleavage sites**

197 In addition to cleaving the viral polyprotein, the picornavirus proteases cleave cellular factors to facilitate  
198 viral replication, including both antiviral factors and cellular factors that favor viral IRES-driven translation  
199 mechanism over cellular cap-dependent translation (e.g. DDX58, eIF4G, and PABP) <sup>27,29</sup>. As the canonical  
200 3C/3CD<sup>pro</sup> QG cleavage site occurs on average 1.6 times per protein in the human proteome (~33,000  
201 times), we sought to examine if the rich dataset we obtained for the amino acid preferences of the capsid  
202 3CD<sup>pro</sup> cleavage sites can be used to identify novel cellular factors that are targeted by the viral protease.  
203 Specifically, a position-specific score matrix (PSSM) was generated for the 10 amino acid region spanning  
204 the two protease cleavage sites in the CVB3 capsid (P5-P5') based on the amino acid preferences identified  
205 in our study (Fig. 5D). This PSSM was then used to query the human proteome for potential cleavage sites,  
206 yielding a total of 746 cytoplasmic proteins (Fig. 5D; Supplementary Table S8). Eleven cellular factors that  
207 are known to be cleaved during enterovirus infection were identified using this approach, including the  
208 viral sensor Probable ATP-dependent RNA helicase DDX58 (RIG1), the immune transcription factors p65  
209 (RELA) and interferon regulatory factor 7 (IRF7), and polyadenylate-binding protein 1 (PABPC1), an  
210 important factor in translation initiation and mRNA stability (Supplementary Table S8) <sup>27,30</sup>.

211

212 To evaluate whether our approach can identify novel cellular targets for the viral protease, we examined  
213 the ability of 3CD<sup>pro</sup> to cleave eight different proteins found in the data set, focusing on those with cellular  
214 functions of potential relevance to CVB3 biology and which could be readily detected in our cell culture  
215 assay (e.g. availability of antibodies or tagged-variants, cleavage fragments of observable size, and high  
216 expression level). These included four interferon-inducible proteins (Pleckstrin Homology Domain  
217 Containing A4, PLEKHA4; Phospholipid Scramblase 1, PLSCR1; NOD-like receptor family CARD domain  
218 containing 5, NLRC5; Zinc Finger CCCH-Type Containing, Antiviral 1, ZC3HAV1) and four proteins involved  
219 in various cellular functions, namely apoptosis (MAGE Family Member D1, MAGED1), RNA processing (WD  
220 repeat domain 33, WDR33), and vesicle transport (Cyclin G Associated Kinase, GAK; Tumor Susceptibility  
221 101, TSG101). Of these, three proteins were cleaved upon expression of the viral protease to generate  
222 fragments of the expected size (PLSCR1, PLEKHA4, and WDR33; Fig. 5E and Supplementary Table S8). Of  
223 note, while WDR33 was predicted to harbor two potential cleavage sites, only a single cleavage event was  
224 observed. Treatment with a specific 3CD<sup>pro</sup> inhibitor, rupintrivir<sup>31</sup>, blocked the cleavage of these proteins,  
225 indicating the effect was due to the viral protease (Fig. 5D). In contrast, five of the proteins were found to  
226 not be cleaved upon 3CD<sup>pro</sup> expression, suggesting additional determinants are involved in the cleavage  
227 of host factors (Fig. S6). Hence, our approach correctly identified 30% of the predicted cleavage sites (3 of  
228 the 9 different cleavage sites), indicating a strong enrichment of cellular targets of the 3CD<sup>pro</sup> in the  
229 dataset.

## 230 CONCLUSIONS

231 The picornavirus capsid is a highly complex structure that plays key roles in viral biology and pathogenesis.  
232 In the current study, we employ a comprehensive approach to define the effects of single amino acid  
233 mutations in the CVB3 capsid, measuring the effects of >90% of all possible mutations. We find that most  
234 mutations in the capsid are deleterious, with very few mutations showing higher fitness than the WT  
235 sequence (1.2% of all mutations). Similar results have been reported in other non-enveloped capsid  
236 proteins<sup>32-34</sup> as well as non-capsid viral proteins<sup>17,35-41</sup>. In light of these results, it is likely that the large  
237 population sizes of RNA viruses help maintain viral fitness in the face of high mutation rates and strong  
238 mutational fitness costs.

239

240 Investigation of the factors that influence MFE in the capsid revealed a strong correlation with various  
241 structural and functional attributes. These included computationally predicted effects on stability and  
242 aggregation propensity, secondary structure, and surface exposure (Fig. 2). Surprisingly, we find that MFE  
243 can be predicted with relatively high accuracy using only five parameters: natural sequence variation, the  
244 identity of the original and mutant amino acid, the predicted effect on protein stability, and relative  
245 solvent accessibility (Fig. 3). A recent study examined the ability of 46 different variant effect prediction  
246 tools to predict MFE from 31 different DMS datasets of both viral and non-viral proteins<sup>42</sup>. Overall, viral  
247 proteins showed the lowest predictability (Spearman's correlation of <0.5). In contrast, we were able to  
248 predict MFE using a random forest model using these above-mentioned five parameters with an accuracy  
249 similar to the best prediction obtained in this analysis for any viral or non-viral protein (Pearson's  $r = 0.73$ ;  
250 Spearman's  $\rho = 0.73$ ; Fig. 3B). Interestingly, SNAP2<sup>43</sup>, a neural network-based classifier of mutational  
251 effects that was shown to correlate well with MFE in other studies<sup>42,44,45</sup>, correlated poorly with our data  
252 ( $R^2 = -0.26$ ). Overall, considering the relative conservation of capsid structure in picornaviruses as well as

253 the availability of both capsid sequences and high-resolution structures for numerous members of this  
254 family, it is likely that these findings can be extrapolated to additional picornaviruses.

255

256 Incorporating site-specific amino acid preferences obtained from our DMS results into phylogenetic  
257 models was found to significantly improve model accuracy. This has been observed in DMS studies with  
258 other RNA viruses <sup>24,39,46</sup>, and indicate that our laboratory-measured MFE capture additional information  
259 that cannot be obtained from sequence analysis alone. In addition, this approach allowed us to assess  
260 which sites show differential selection patterns as a result of the distinct environments encountered in  
261 nature and the laboratory. As expected, pressure from the adaptive immune system was found to be the  
262 major difference between these environments, with residues in antibody neutralization sites showing  
263 higher differential selection compared to other sites in the capsid (Fig. 4A). Moreover, the sites showing  
264 the highest degree of differential selection were found in known antibody neutralization sites (Fig. 4B-D).  
265 However, why these particular residues within antibody neutralization sites show differential selection,  
266 while others do not, remain to be elucidated. It has been shown that one, or a few, sites within antibody  
267 binding regions can have strong effects on escape from antibody neutralization <sup>47</sup>, potentially explaining  
268 these findings. Interestingly, while the top three sites showing differential selection were in antibody  
269 neutralization sites, the mutation showing the fourth-highest differential selection was found in the HI  
270 loop of VP1. While not classically considered an antibody epitope, this loop has been shown to interact  
271 with an antibody fragment in the picornavirus coxsackievirus A6 <sup>48</sup>, is known to mediate receptor binding  
272 in different picornaviruses <sup>49,50</sup>, and to interact with host cyclophilin A to facilitate uncoating <sup>15</sup>. Whether  
273 these factors or others are responsible for the observed differential selection remains to be elucidated.

274

275 The CVB3 capsid encodes the information for directing myristoylation, protease cleavage, and interaction  
276 with host factors. We took advantage of our data to examine the sequence specificity and mutational  
277 tolerance of several known capsid encoded motifs. First, we examined the amino acid preferences of the  
278 CVB3 capsid myristoylation motif. We observe a strong correlation with the canonical myristoylation  
279 pattern (Prosite pattern PDOC00008), although with greater intolerance to mutations in three of the six  
280 residues in the capsid (Fig. S5). This is likely to stem from additional constraints imposed by capsid  
281 structure. On the other hand, we examined the amino acid preference of a conserved motif in VP1 that is  
282 required for 3CD<sup>pro</sup>-mediated cleavage of picornavirus capsids <sup>26</sup>. Our data showed a higher cost to  
283 mutation in this motif relative to other capsid positions (Fig. S5), highlighting its importance for capsid  
284 function. Finally, we examined the sequence preferences surrounding the two 3CD<sup>pro</sup> cleavage sites. We  
285 find a strong dependence on the cleavage site residues (positions P1 and P1'; Fig. 5) and to a lesser degree  
286 position P4, with large variation in the sequence preferences across the remaining positions between the  
287 two cleavage sites. Overall, our experimentally measured MFE are congruent with existing information  
288 regarding the sequence preferences of the examined capsid motifs, yet provide in-depth insights into  
289 sequence specificity that cannot be obtained from examining natural sequence variation.

290

291 Finally, we used the amino acid preferences observed in 3CD<sup>pro</sup> cleavage sites within the capsid to query  
292 the human genome for potential cellular targets of this protease (Fig. 5D). Using this approach, we identify  
293 746 cytoplasmic proteins that harbor a potential 3CD<sup>pro</sup> target sequence, including 11 proteins previously  
294 shown to be cleaved by different picornavirus 3C proteases. We then validated our approach using eight  
295 proteins, comprising nine predicted cleavage sites. Six of the predicted cleavage sites were not affected  
296 by 3CD<sup>pro</sup> expression (Fig. S6). On the other hand, three proteins were observed to be specifically cleaved  
297 by the viral protease (Fig. 5E): WD Repeat Domain 33 (WDR33), an important factor for polyadenylation  
298 of cellular pre-mRNAs <sup>51</sup> that has been shown to act as a restriction factor during influenza infection <sup>52</sup>;

299 the interferon-induced protein Phospholipid scramblase 1 (PLSCR1), which is involved in the replication  
300 of numerous viruses, likely due to its ability to enhance the expression of certain interferon-stimulated  
301 genes<sup>53</sup>; and the interferon-induced Pleckstrin Homology Domain Containing A4 (PLEKHA4), a plasma  
302 membrane-localized signaling modulator<sup>54</sup> that is currently not known to play a role in viral infection.  
303 Overall, our approach correctly predicts 30% of the identified cleavage sites. It is likely that incorporating  
304 additional selection criteria, such as accessibility of the cleavage peptide in the folded structure, can be  
305 used to further reduce false positives. Nevertheless, extrapolating our validation results to the larger  
306 dataset suggests >200 new host targets of the protease are identified, many of which could play key roles  
307 in viral biology and pathogenesis.

308

#### 309 **FUNDING**

310 This work was funded by a grant from the Spanish Ministerio de Ciencia, Innovación y Universidades to  
311 RG (BFU2017-86094-R). RG holds the Ramón y Cajal fellowship from the Spanish Ministry of Economy and  
312 Competitiveness (RYC-2015-17517) and FM an FPI grant from the Spanish Ministerio de Ciencia,  
313 Innovación y Universidades (BES-2016-076677).

314

#### 315 **ACKNOWLEDGMENTS**

316 The authors would like to thank Dr. Javier O. Cifuentes for help with the interpretation of antibody  
317 neutralization sites and Drs. Santiago Elena and Tzachi Hagai for critical reading of the manuscript. In  
318 addition, the authors would like to acknowledge the use of the Principe Felipe Research Center (CIPF)  
319 server which was co-financed by the European Union through the Operativa Program of the European  
320 Regional Development Fund (ERDF/FEDER) of the Comunitat Valenciana 2014-2020.

321

322 **AUTHOR CONTRIBUTIONS**

323 FM, VL, and RG designed and performed the experiments. FM, VL, OT, AS and RG analyzed the data. FM,  
324 VL, AS, and RG wrote the manuscript. RG acquired funding.

325 **METHODS**

326 **Viruses, cells, and plaque assays:** HeLa-H1 (CRL-1958) and HEK293 (CRL-1573) cells were obtained from  
327 ATCC. All work with CVB3 was based on the Nancy infectious clone (kind gift of Dr. Marco Vignuzzi,  
328 Institute Pasteur). Cells were cultured in culture media (DMEM with 10% heat-inactivated FBS, Pen-Strep,  
329 and L-Glutamine) with FBS concentrations of 2% during infection. For plaque assays, serial dilutions of the  
330 virus were used to infect confluent HeLa-H1 cells in 6 well plates for 45 minutes, followed by overlaying  
331 the cells with a 1:1 mixture of 56°C 1.6% Agar (Arcos Organics 443570010) and 37°C 2x DMEM with 4%  
332 FBS. Two days later, plates were fixed with formaldehyde (2% final concentration) after which the agar  
333 was removed and the cells stained with crystal violet to visualize plaques.

334 **Deep mutational scanning (DMS):** The infectious clone was modified by site-directed mutagenesis to  
335 remove an XhoI site present in the capsid region (P1) and introduce an XhoI site at position 692 as well as  
336 a Kpn2I site at position 3314, generating a pCVB3-XhoI-P1-Kpn2I clone<sup>55</sup>. In addition, a pCVB3-XhoI-ΔP1-  
337 Kpn2I plasmid was generated by replacing the region between the XhoI and Kpn2I sites in pCVB3-XhoI-  
338 P1-Kpn2I with a short linker. To generate the template for DMS, the capsid region was amplified by PCR  
339 from pCVB3-XhoI-P1-Kpn2I with Phusion polymerase (Thermo Scientific) and primers HiFi-F  
340 (CTTTGTTGGGTTTATACCACTTAGCTCGAGAGAGG) and HiFi-R (CCTGTAGTTCCCCACATACACTGCTCCG) and  
341 gel purified (Zymoclean Gel DNA Recovery Kit). Primers spanning the full coding region of the capsid region  
342 were designed using the CodonTilingPrimers software from the Bloom lab  
343 (<https://github.com/jbloomlab/CodonTilingPrimers>) with the default parameters and synthesized by IDT



344 (Supplementary Table S1). These primers were used to perform the mutagenesis PCR on the capsid  
345 template together with the HiFi-F or HiFi-R primers in triplicate following published protocols<sup>56</sup> with the  
346 exception that 10 rounds of mutagenesis were performed for libraries 1 and 2, while a second round of 7  
347 mutagenesis cycles was performed for library 3 to increase the number of mutation per clone. The  
348 products were gel purified and ligated to an XhoI and Kpn2I digested and gel purified pCVB3-XhoI- $\Delta$ P1-  
349 Kpn2I using NEBuilder<sup>®</sup> HiFi DNA Assembly reaction (NEB) for 25 minutes. Mutagenesis efficiency was  
350 evaluated by the transformation of the assembled plasmids into NZY5 $\alpha$  competent cells (NZY Tech),  
351 Sanger sequencing of 18-23 clones per library, and mutation analysis using the Sanger Mutant Library  
352 Analysis script (<https://github.com/jbloomlab/SangerMutantLibraryAnalysis>). Subsequently, the  
353 assembled plasmid reactions were purified using a Zymo DNA Clean & Concentrator-5 kit (Zymo Research)  
354 and used to electroporate MegaX DH10B T1R Electrocomp cells (ThermoFisher) using a Gene Pulser XCell  
355 electroporator (BioRad) according to the manufacturer's protocol. Cells were then grown overnight in a  
356 50 mL liquid culture at 33°C and DNA purified using the PureLink HiPure plasmid midiprep kit (Invitrogen).  
357 Transformation efficiency was estimated by plating serial dilutions of the transformation on agar plates.  
358 In total,  $4.44 \times 10^5$ ,  $1.46 \times 10^5$ , and  $2.19 \times 10^5$  transformants were obtained for lines 1, 2, and 3, respectively.  
359 Viral genomic RNA was then transcribed from Sall linearized, gel-purified full-length plasmids using the  
360 TranscriptAid T7 kit (ThermoScientific), and four electroporations were performed using  $4 \times 10^6$  HeLa-H1  
361 cells in a 4mm cuvette in 400 $\mu$ L of calcium and magnesium-free PBS using with 8 $\mu$ g of RNA in a Gene  
362 Pulser XCell (BioRad) set to 240V and 950uF. Electroporated cells were then pooled, and one fourth was  
363 cultured for 9 hours to produce the passage 0 virus (P0). Following three freeze-thaw cycles,  $2 \times 10^6$  plaque-  
364 forming units (PFU) were used to infect a 90% confluent 15cm plate in 2.5mL of infection media for 1  
365 hour. Cells were then washed with PBS and incubated in 12 mL of infection media for 9 hours. Finally, cells  
366 were subjected to 3 freeze-thaw cycles, debris removed by centrifugation at 500xg and the supernatants

367 collected to generate P1 virus stocks. All infection produced  $> 2.38 \times 10^6$  PFU in P0 and  $> 1.2 \times 10^7$  PFU in P1  
368 as judged by plaque assay.

369 **NGS analysis:**

370 Libraries were prepared following published protocols <sup>57</sup> and each library was run on a Novaseq6000  
371 2x150 at a maximum of 30G per lane to reduce potential index hopping. Reads trimming was performed  
372 using fastp <sup>58</sup> (command: `-max_len1 150 --max_len2 150 --length_required 150 -x -Q -A`), unsorted bam  
373 files were generated from fastq files using Picard tools FastqToSam (version 2.2.4) and merged into a  
374 single bam using the cat command of Samtools (version 1.5). The duplex pipeline was then implemented  
375 (<https://github.com/KennedyLabUW/Duplex-Sequencing/UnifiedConsensusMaker.py>) using the  
376 UnifiedConsensusMaker.py script and a minimum family size of 3, a cutoff of 0.9 for consensus calling,  
377 and an N cutoff of 0.3. The single-stranded consensus files (SSCS) were then aligned using BWA mem  
378 (version 0.7.16), sorted using Samtools, size selected to be 133 bp long using VariantBam <sup>59</sup>, unaligned  
379 reads were discarded (Samtools view command with `-F 4`), and the resulting bam file indexed with  
380 Samtools. Subsequently, fgbio (<http://fulcrumgenomics.github.io/fgbio/>; version 1.1.0) was used to hard-  
381 clip 10 bp from each end and upgrade all clipping to hard-clip (`-c Hard --upgrade-clipping true --read-one-  
382 five-prime 10 --read-one-three-prime 10 --read-two-five-prime 10 --read-two-three-prime 10`). Variant  
383 bam was then used to keep all reads that were between 50-150bp, well-mapped, and had either no indels  
384 and less than 5 mutations (command `-r {"rules":[{"ins":[0,0],"del":[0,0],"nm":[0,4],  
385 "mate_mapped":true,"fr":true,"length":[50,150]}}}`). Finally, the codons in each read were identified  
386 using the VirVarSeq <sup>60</sup> Codon\_table.pl script using a minimum read quality of 20. A custom R script was  
387 then used to generate a codon counts table for each codon position by eliminating all codons containing  
388 ambiguous nucleotides and codons with a strong strand bias (`StrandOddsRatio > 4`), as well as all codons  
389 that are reached via a single mutation (available at [https://github.com/RGellerLab/CVB3\\_Capsid\\_DMS](https://github.com/RGellerLab/CVB3_Capsid_DMS)).

390 Amino acid preferences and mutational fitness effects were determined using DMStools2 <sup>19</sup> with the  
391 Bayesian option and the default settings.

392 **Structural analyses:** The crystal structure PDB:4GB3 <sup>61</sup> was used for all structural analysis. The effects of  
393 mutations on aggregation were determined using TANGO version 2.3.1 <sup>22</sup> using the default settings and  
394 the effect on stability on the monomer and pentamer was determined using FoldX 4 <sup>21</sup> using the default  
395 settings. For the latter, the pentamer subunits were renamed to unique letters, all mutations between  
396 the reference sequence and the structure sequence were introduced using the BuildModel command, the  
397 structure was optimized using the RepairPDB command 5 or 10 times for the pentamer or monomer,  
398 respectively, and then the effects of the mutations were predicted using the BuildModel command  
399 (modified PDB files can be found at [https://github.com/RGellerLab/CVB3\\_Capsid\\_DMS](https://github.com/RGellerLab/CVB3_Capsid_DMS)). Secondary  
400 structure and RSA were obtained from DSSP (<http://swift.cmbi.ru.nl/gv/dssp/>) using the dms\_tools2.dssp  
401 function of dms\_tools2, while interface, surface, and core residues as well as residue contact number, and  
402 presence in the two, three, and five-fold axes were obtained from ViprDB (<http://viprdb.scripps.edu/>) <sup>62</sup>.  
403 Distance from the center was calculated with Pymol using the Distancetoatom.py script on the monomer  
404 or pentamer.

405 **Generation and evaluation of CVB3 capsid mutants:** The PCR of the capsid region used as a template for  
406 DMS was phosphorylated and cloned into a SmaI digested pUC19 vector for use in the mutagenesis  
407 reactions (pUC19-HiFi-P1). For each mutant, non-overlapping primers containing the mutation in the  
408 middle of the forward primer were used to introduce the mutation with Phusion polymerase, followed by  
409 DpnI (Thermo Scientific) treatment, phosphorylation, ligation, and transformation of chemically  
410 competent bacteria. Successful mutagenesis was verified by Sanger sequencing. Subsequently, the capsid  
411 region was subcloned into pCVB3-XhoI-ΔP1-Kpn2I using XhoI and Kpn2I sites. Plasmids were then  
412 linearized with MluI and 2μg of plasmid was transfected into 5x10<sup>5</sup> HEK293 cells together with a plasmid  
413 encoding the T7 polymerase <sup>63</sup> (Addgene 65974) using calcium phosphate. Briefly, an equal volume of 2x

414 HBS (274mM NaCl, 10mM KCl, 1.4mM Na<sub>2</sub>HPO<sub>4</sub>) was added dropwise to DNA containing 0.25M CaCl<sub>2</sub>  
415 while mixing, incubated 15 minutes at RT, and then added dropwise to cells. Following 48 hours, passage  
416 0 (P0) virus was collected and titered by plaque assay. From this, 10<sup>5</sup> PFU were used to infect 90%  
417 confluent 6 well HeLa-H1 cells (MOI 0.1) for 1 hour at 37°C, after which the cells were washed twice with  
418 PBS and 2mL of infection media added. Cells were then incubated until CPE was observed. Emerging viral  
419 populations were titered by plaque assay and the capsid region sequenced to ensure no compensatory  
420 mutations or reversions arose during replication. The fitness of these mutants was then tested by direct  
421 competition with a marked reference virus using a Taqman RT-PCR method <sup>20</sup>. Briefly, in quadruplicates,  
422 confluent HeLa-H1 cells in a 24 well plate were infected with 200μL of a 1:1 mixture of 4x10<sup>3</sup> PFU (MOI  
423 0.01) of the test and marked reference viruses for 45 minutes. Subsequently, the inoculum was removed,  
424 the cells were washed twice with PBS, 200 μL of infection media was added, and the cells were incubated  
425 for 24 hours at 37°C. Finally, cells were subjected to 3 freeze-thaw cycles, debris removed by  
426 centrifugation at 500xg, the supernatants collected and treated with 2uL of RNase-Free DNaseI  
427 (ThermoFisher) for 15 minutes at 37°C, and viral RNA extracted using the *Quick-RNA*<sup>TM</sup> Viral Kit (Zymo  
428 Research), eluting in 20μl. Quantification of the replication of each mutant versus the reference was  
429 performed using Luna<sup>®</sup> Universal Probe One-Step RT-qPCR kit (New England BioLabs) containing 3uL of  
430 total RNA, 0.4μM of each qPCR primers and 0.2μM of each probe. The standard curve was performed  
431 using 10-fold dilutions of RNA extracted from 10<sup>7</sup> PFU of wild-type and reference viruses. All samples were  
432 performed with three technical replicates. The relative fitness (W) of each mutant versus the common  
433 marked reference virus was calculated using the formula  $W = [R(t)/R(0)]^{1/t}$ , where R(0) and R(t) represents  
434 the ratio of the mutant to the reference virus genomes in the initial mixture used for the infection and  
435 after 1 day (t=1), respectively <sup>20,64</sup>.

436 **Sequence variability and phylogenetic analyses:** Amino acid variability was assessed using Shannon  
437 entropy. Briefly, all available, non-identical, full-genome CVB3, CVB, or Enterovirus B sequences were

438 downloaded from Virus Pathogen Resource <sup>65</sup> ([www.viprbrc.org](http://www.viprbrc.org)) and codon-aligned using the DECIPHER  
439 package in R (available at [https://github.com/RGellerLab/CVB3\\_Capsid\\_DMS](https://github.com/RGellerLab/CVB3_Capsid_DMS)). All alignment positions not  
440 present in our reference strain were removed, and a custom R script was used to calculate Shannon  
441 entropy. For phylogenetic and differential selection analyses, PhyDMS was run using the default settings  
442 on an alignment of CVB3 genomes that was processed with the `phydms_prealignment` module and using  
443 the average preferences from the three DMS replicates.

444 **Identification of 3CD<sup>pro</sup> cleavage sites in the human proteome:** The amino acid preferences (the relative  
445 enrichment of each amino acid at each position standardized to 1) was used to generate in silico 1000  
446 peptides spanning the 10 amino acid region surrounding each cleavage site using a custom R script  
447 (available at [https://github.com/RGellerLab/CVB3\\_Capsid\\_DMS](https://github.com/RGellerLab/CVB3_Capsid_DMS)). Specifically, for each peptide position,  
448 100 peptides were generated that encoded each amino acid at a frequency corresponding to its  
449 preference observed in the DMS results, with the remaining positions unchanged. The resulting 1000  
450 peptides from each cleavage site were uploaded to PSSMSearch <sup>66</sup> (<http://slim.icr.ac.uk/pssmsearch/>)  
451 using the default setting (`psi_blast IC`). Results were filtered to remove proteins indicated to be secreted,  
452 luminal, or extracellular in the Warnings column. To test whether proteins were cleaved by the viral 3CD  
453 protease, the corresponding region was PCR amplified from the Nancy infectious clone (primers 3C-For:  
454 TATTCTCGAGACCATGGGCCCTGCCTTTGAGTTCG and 3D-Rev:  
455 TATTGCGGCCGCCTAGAAAGGAGTCCAACCATTCCT) and cloned into the pIRES plasmid (Clontech) using  
456 the restriction sites XhoI and NotI (pIRES-3CD<sup>pro</sup>). For analysis of fusion proteins, HEK293 cells were  
457 transfected with GFP-PLEKHA4 (kind gift of Dr. Jeremy Baskin, Cornell University), GFP-PLSCR1 (kind gift  
458 of Dr. Serge Benichou, Institut Cochin), FLAG-NLCR5 (Addgene #37521), HA-ZC3HAV1 (Addgene #45907),  
459 or the control plasmid FLuc-eGFP (Addgene #90170) together with the pIRES-3CD<sup>pro</sup> plasmid using  
460 Lipofectamine 2000. Following 24 hours, proteins were collected by lysing in lysis buffer (50mM TRIS-HCl,  
461 150mM NaCl, 1% NP40 and protease inhibitor cocktail [Complete Mini EDTA-free, Roche]) and subjected

462 to western blotting with the corresponding antibody (anti-GFP, Santa Cruz sc-9996; Anti FLAG, Santa Cruz  
463 sc-166335; anti-HA, Santa Cruz, sc-7392). For analysis of endogenous proteins, 3CD<sup>pro</sup> was expressed for  
464 48 hours before cell lysis, and western blotting using antibodies against WDR33 (Santa Cruz sc-374466),  
465 TSG101 (Santa Cruz sc-136111), GAK (Santa Cruz sc-137053), and MAGED1 (Santa Cruz sc-393291). When  
466 indicated, the 3C<sup>pro</sup> inhibitor rupintrivir (Tocris Biosciences) was added at a concentration of 2  $\mu$ M for the  
467 last 24 hours before collection. The predicted molecular weight of cleaved fragments was calculated using  
468 the mw function of the Peptides R package (version 2.4.2).

469 **Statistical analyses:** All statistical analyses were performed in R and were two-tailed. For random forest  
470 prediction, the R RandomForest package (version 4.6-14) was employed using the default setting with an  
471 mtry of 10, and for the linear model, the formula  $\text{lm}(\text{MFE} \sim \text{enterovirus B entropy} + \text{WT amino acid} * \text{mutant amino acid} + \text{predicted effect of mutations on stability in the pentamer} + \text{relative surface exposure})$  was used (available at [https://github.com/RGellerLab/CVB3\\_Capsid\\_DMS](https://github.com/RGellerLab/CVB3_Capsid_DMS)). Sequence logoplots  
472 were producing using Logolas<sup>67</sup>.

475 **Data availability:** Unaligned bam files have been uploaded to SRA (Accession SAMN15437545-  
476 SAMN15437555; SRA 15437545-15437555). The scripts and data required to obtain the codon count  
477 tables for all samples, to perform the random forest and linear model predictions, to generate the  
478 peptides for use with PSSMsearch, as well as the sequence alignments and modified structure files for  
479 FoldX analysis can be found on Github ([https://github.com/RGellerLab/CVB3\\_Capsid\\_DMS](https://github.com/RGellerLab/CVB3_Capsid_DMS)).

480 **REFERENCES**

- 481 1. Harrison, S. C. Principles of Virus Structure. in *Fields Virology* (eds. Knipe, D. M. & Howley, P. M.)  
482 52–86 (Wolters Kluwer Health/Lippincott Williams & Wilkins, 2013).
- 483 2. Hunter, E. Virus Assembly. in *Fields Virology* (eds. Knipe, D. M. & Howley, P. M.) 127–152  
484 (Wolters Kluwer Health/Lippincott Williams & Wilkins, 2013).
- 485 3. Perlmutter, J. D. & Hagan, M. F. Mechanisms of virus assembly. *Annu. Rev. Phys. Chem.* **66**, 217–  
486 39 (2015).
- 487 4. Geller, R., Vignuzzi, M., Andino, R. & Frydman, J. Evolutionary constraints on chaperone-  
488 mediated folding provide an antiviral approach refractory to development of drug resistance.  
489 *Genes Dev.* **21**, 195–205 (2007).
- 490 5. Macejak, D. G. & Sarnow, P. Association of heat shock protein 70 with enterovirus capsid  
491 precursor P1 in infected human cells. *J. Virol.* **66**, 1520–1527 (1992).
- 492 6. Callaway, A., Giesman-Cookmeyer, D., Gillock, E. T., Sit, T. L. & Lommel, S. A. The multifunctional  
493 capsid proteins of plant RNA viruses. *Annual Review of Phytopathology* (2001).  
494 doi:10.1146/annurev.phyto.39.1.419
- 495 7. Jiang, P. *et al.* Picornavirus Morphogenesis. *Microbiol. Mol. Biol. Rev.* **78**, 418–437 (2014).
- 496 8. Fields, B. N., Knipe, D. M. & Howley, P. M. *Fields virology*. (Wolters Kluwer Health/Lippincott  
497 Williams & Wilkins, 2013).
- 498 9. Rossmann, M. G., He, Y. & Kuhn, R. J. Picornavirus-receptor interactions. *Trends in Microbiology*  
499 (2002). doi:10.1016/S0966-842X(02)02383-1
- 500 10. Helenius, A. Virus Entry and Uncoating. in *Fields Virology* (eds. Knipe, D. M. & Howley, P. M.) 87–  
501 104 (Wolters Kluwer Health/Lippincott Williams & Wilkins, 2013).
- 502 11. Cifuentes, J. O. & Moratorio, G. Evolutionary and Structural Overview of Human Picornavirus  
503 Capsid Antibody Evasion. *Front. Cell. Infect. Microbiol.* **9**, 1–11 (2019).
- 504 12. Heise, M. T. & Virgin, H. W. Pathogenesis of viral infection. in *Fields Virology* (eds. Knipe, D. M. &  
505 Howley, P. M.) **1**, 254–285 (Wolters Kluwer Health/Lippincott Williams & Wilkins, 2013).
- 506 13. Racaniello, V. R. Picornaviridae: The Viruses and Their Replication. in *Fields Virology* (eds. Knipe,

- 507 M. D. & Howley, M. P.) 453–489 (Philadelphia : Wolters Kluwer Health/Lippincott Williams &  
508 Wilkins, c2013., 2013).
- 509 14. Thibaut, H. J. *et al.* Binding of Glutathione to Enterovirus Capsids Is Essential for Virion  
510 Morphogenesis. *PLoS Pathog.* **10**, e1004039 (2014).
- 511 15. Qing, J. *et al.* Cyclophilin A Associates with Enterovirus-71 Virus Capsid and Plays an Essential  
512 Role in Viral Infection as an Uncoating Regulator. *PLoS Pathog.* (2014).  
513 doi:10.1371/journal.ppat.1004422
- 514 16. Corbic Ramljak, I. *et al.* Cellular N-myristoyltransferases play a crucial picornavirus genus-specific  
515 role in viral assembly, virion maturation, and infectivity. *PLOS Pathogens* **14**, (2018).
- 516 17. Bloom, J. D. An experimentally determined evolutionary model dramatically improves  
517 phylogenetic fit. *Mol. Biol. Evol.* **31**, 1956–78 (2014).
- 518 18. Schmitt, M. W. *et al.* Detection of ultra-rare mutations by next-generation sequencing. *Proc. Natl.*  
519 *Acad. Sci.* **109**, 14508–14513 (2012).
- 520 19. Bloom, J. D. Software for the analysis and visualization of deep mutational scanning data. *BMC*  
521 *Bioinformatics* **16**, 168 (2015).
- 522 20. Moratorio, G. *et al.* Attenuation of RNA viruses by redirecting their evolution in sequence space.  
523 *Nat. Microbiol.* **2**, 17088 (2017).
- 524 21. Schymkowitz, J. *et al.* The FoldX web server: an online force field. *Nucleic Acids Res.* **33**, W382-8  
525 (2005).
- 526 22. Fernandez-Escamilla, A.-M., Rousseau, F., Schymkowitz, J. & Serrano, L. Prediction of sequence-  
527 dependent and mutational effects on the aggregation of peptides and proteins. *Nat. Biotechnol.*  
528 **22**, 1302–1306 (2004).
- 529 23. Hilton, S. K., Doud, M. B. & Bloom, J. D. Phydms: Software for phylogenetic analyses informed by  
530 deep mutational scanning. *PeerJ* (2017). doi:10.7717/peerj.3657
- 531 24. Bloom, J. D. Identification of positive selection in genes is greatly improved by using  
532 experimentally informed site-specific models. *Biol. Direct* **12**, 1 (2017).
- 533 25. Bologna, G., Yvon, C., Duvaud, S. & Veuthey, A. L. N-terminal myristoylation predictions by



- 534 ensembles of neural networks. *Proteomics* **4**, 1626–1632 (2004).
- 535 26. Kristensen, T. & Belsham, G. J. Identification of a short, highly conserved, motif required for  
536 picornavirus capsid precursor processing at distal sites. *PLoS Pathog.* **15**, e1007509 (2019).
- 537 27. Laitinen, O. H. *et al.* Enteroviral proteases: structure, host interactions and pathogenicity. *Rev.*  
538 *Med. Virol.* **26**, 251–267 (2016).
- 539 28. Ypma-Wong, M. F., Dewalt, P. G., Johnson, V. H., Lamb, J. G. & Semler, B. L. Protein 3CD is the  
540 major poliovirus proteinase responsible for cleavage of the p1 capsid precursor. *Virology* **166**,  
541 265–270 (1988).
- 542 29. Sun, D., Chen, S., Cheng, A. & Wang, M. Roles of the picornaviral 3c proteinase in the viral life  
543 cycle and host cells. *Viruses* **8**, 1–22 (2016).
- 544 30. Jagdeo, J. M. *et al.* N-Terminomics TAILS Identifies Host Cell Substrates of Poliovirus and  
545 Coxsackievirus B3 3C Proteinases That Modulate Virus Infection. *J. Virol.* **92**, 1–23 (2018).
- 546 31. Dragovich, P. S. *et al.* Structure-Based Design, Synthesis, and Biological Evaluation of Irreversible  
547 Human Rhinovirus 3C Protease Inhibitors. 4. Incorporation of P 1 Lactam Moieties as I -Glutamine  
548 Replacements. *J. Med. Chem.* **42**, 1213–1224 (1999).
- 549 32. Hartman, E. C. *et al.* Quantitative characterization of all single amino acid variants of a viral  
550 capsid-based drug delivery vehicle. *Nat. Commun.* **9**, 1385 (2018).
- 551 33. Ogden, P. J., Kelsic, E. D., Sinai, S. & Church, G. M. Comprehensive AAV capsid fitness landscape  
552 reveals a viral gene and enables machine-guided design. *Science* **366**, 1139–1143 (2019).
- 553 34. Acevedo, A., Brodsky, L. & Andino, R. Mutational and fitness landscapes of an RNA virus revealed  
554 through population sequencing. *Nature* **505**, 686–90 (2014).
- 555 35. Du, Y. *et al.* Annotating Protein Functional Residues by Coupling High-Throughput Fitness Profile  
556 and Homologous-Structure Analysis. *MBio* **7**, 1–13 (2016).
- 557 36. Wu, N. C. *et al.* Functional Constraint Profiling of a Viral Protein Reveals Discordance of  
558 Evolutionary Conservation and Functionality. *PLoS Genet.* **11**, e1005310 (2015).
- 559 37. Thyagarajan, B. & Bloom, J. D. The inherent mutational tolerance and antigenic evolvability of  
560 influenza hemagglutinin. *Elife* **3**, 1–26 (2014).

- 561 38. Haddox, H. K. *et al.* Experimental Estimation of the Effects of All Amino-Acid Mutations to HIV's  
562 Envelope Protein on Viral Replication in Cell Culture. *PLoS Pathog.* **12**, e1006114 (2016).
- 563 39. Doud, M. B. & Bloom, J. D. Accurate Measurement of the Effects of All Amino-Acid Mutations on  
564 Influenza Hemagglutinin. *Viruses* **8**, 1–17 (2016).
- 565 40. Ashenberg, O., Padmakumar, J., Doud, M. B. & Bloom, J. D. Deep mutational scanning identifies  
566 sites in influenza nucleoprotein that affect viral inhibition by MxA. *PLoS Pathog.* **13**, e1006288  
567 (2017).
- 568 41. Hom, N., Gentles, L., Bloom, J. D. & Lee, K. K. Deep Mutational Scan of the Highly Conserved  
569 Influenza A Virus M1 Matrix Protein Reveals Substantial Intrinsic Mutational Tolerance. *J. Virol.*  
570 **93**, 1–16 (2019).
- 571 42. Livesey, B. J. & Marsh, J. A. Using deep mutational scanning to benchmark variant effect  
572 predictors and identify disease mutations. *Mol. Syst. Biol.* **16**, 1–12 (2020).
- 573 43. Hecht, M., Bromberg, Y. & Rost, B. Better prediction of functional effects for sequence variants.  
574 *BMC Genomics* **16**, S1 (2015).
- 575 44. Gray, V. E., Hause, R. J., Luebeck, J., Shendure, J. & Fowler, D. M. Quantitative Missense Variant  
576 Effect Prediction Using Large-Scale Mutagenesis Data. *Cell Syst.* **6**, 116-124.e3 (2018).
- 577 45. Reeb, J., Wirth, T. & Rost, B. Variant effect predictions capture some aspects of deep mutational  
578 scanning experiments. *BMC Bioinformatics* **21**, 107 (2020).
- 579 46. Haddox, H. K., Dingens, A. S., Hilton, S. K., Overbaugh, J. & Bloom, J. D. Mapping mutational  
580 effects along the evolutionary landscape of HIV envelope. *Elife* **7**, e34420 (2018).
- 581 47. Lee, J. M. *et al.* Mapping person-to-person variation in viral mutations that escape polyclonal  
582 serum targeting influenza hemagglutinin. *Elife* **8**, 1–28 (2019).
- 583 48. Xu, L. *et al.* Atomic structures of Coxsackievirus A6 and its complex with a neutralizing antibody.  
584 *Nat. Commun.* (2017). doi:10.1038/s41467-017-00477-9
- 585 49. Belnap, D. M. *et al.* Three-dimensional structure of poliovirus receptor bound to poliovirus. *Proc.*  
586 *Natl. Acad. Sci. U. S. A.* (2000). doi:10.1073/pnas.97.1.73
- 587 50. Xing, L. *et al.* Distinct cellular receptor interactions in poliovirus and rhinoviruses. *EMBO J.* **19**,

- 588 1207–16 (2000).
- 589 51. Chan, S. L. *et al.* CPSF30 and Wdr33 directly bind to AAUAAA in mammalian mRNA 3' processing.  
590 *Genes Dev.* **28**, 2370–2380 (2014).
- 591 52. Brass, A. L. *et al.* The IFITM proteins mediate cellular resistance to influenza A H1N1 virus, West  
592 Nile virus, and dengue virus. *Cell* **139**, 1243–54 (2009).
- 593 53. Kodigepalli, K. M., Bowers, K., Sharp, A. & Nanjundan, M. Roles and regulation of phospholipid  
594 scramblases. *FEBS Lett.* **589**, 3–14 (2015).
- 595 54. Shami Shah, A. *et al.* PLEKHA4/kramer Attenuates Dishevelled Ubiquitination to Modulate Wnt  
596 and Planar Cell Polarity Signaling. *Cell Rep.* **27**, 2157-2170.e8 (2019).
- 597 55. Bou, J. V., Geller, R. & Sanjuán, R. Membrane-Associated Enteroviruses Undergo Intercellular  
598 Transmission as Pools of Sibling Viral Genomes. *Cell Rep.* **29**, 714-723.e4 (2019).
- 599 56. Dingens, A. S., Haddox, H. K., Overbaugh, J. & Bloom, J. D. Comprehensive Mapping of HIV-1  
600 Escape from a Broadly Neutralizing Antibody. *Cell Host Microbe* **21**, 777-787.e4 (2017).
- 601 57. Kennedy, S. R. *et al.* Detecting ultralow-frequency mutations by Duplex Sequencing. *Nat. Protoc.*  
602 **9**, 2586–2606 (2014).
- 603 58. Chen, S., Zhou, Y., Chen, Y. & Gu, J. fastp: an ultra-fast all-in-one FASTQ preprocessor.  
604 *Bioinformatics* **34**, i884–i890 (2018).
- 605 59. Wala, J., Zhang, C.-Z., Meyerson, M. & Beroukhim, R. VariantBam: filtering and profiling of next-  
606 generational sequencing data using region-specific rules. *Bioinformatics* **32**, 2029–2031 (2016).
- 607 60. Verbist, B. M. P. *et al.* VirVarSeq: A low-frequency virus variant detection pipeline for Illumina  
608 sequencing using adaptive base-calling accuracy filtering. *Bioinformatics* **31**, 94–101 (2015).
- 609 61. Yoder, J. D., Cifuentes, J. O., Pan, J., Bergelson, J. M. & Hafenstein, S. The Crystal Structure of a  
610 Coxsackievirus B3-RD Variant and a Refined 9-Angstrom Cryo-Electron Microscopy  
611 Reconstruction of the Virus Complexed with Decay-Accelerating Factor (DAF) Provide a New  
612 Footprint of DAF on the Virus Surface. *J. Virol.* **86**, 12571–12581 (2012).
- 613 62. Carrillo-Tripp, M. *et al.* VIPERdb2: an enhanced and web API enabled relational database for  
614 structural virology. *Nucleic Acids Res.* **37**, D436-42 (2009).

- 615 63. Yun, T. *et al.* Efficient reverse genetics reveals genetic determinants of budding and fusogenic  
616 differences between Nipah and Hendra viruses and enables real-time monitoring of viral spread  
617 in small animal models of henipavirus infection. *J. Virol.* **89**, 1242–53 (2015).
- 618 64. Carrasco, P., Daròs, J. A., Agudelo-Romero, P. & Elena, S. F. A real-time RT-PCR assay for  
619 quantifying the fitness of tobacco etch virus in competition experiments. *J. Virol. Methods* (2007).  
620 doi:10.1016/j.jviromet.2006.09.020
- 621 65. Pickett, B. E. *et al.* ViPR: an open bioinformatics database and analysis resource for virology  
622 research. *Nucleic Acids Res.* **40**, D593-8 (2012).
- 623 66. Krystkowiak, I., Manguy, J. & Davey, N. E. PSSMSearch: a server for modeling, visualization,  
624 proteome-wide discovery and annotation of protein motif specificity determinants. *Nucleic Acids*  
625 *Res.* **46**, W235–W241 (2018).
- 626 67. Dey, K. K., Xie, D. & Stephens, M. A new sequence logo plot to highlight enrichment and  
627 depletion. *BMC Bioinformatics* **19**, 473 (2018).

628

629

630 **Table 1:** Incorporation of DMS results in evolutionary models better describes natural CVB3 evolution  
631 compared to standard codon models.

| <b>Model</b>    | <b><math>\Delta</math>AIC</b> | <b>LogLikelihood</b> | <b>Parameters</b> | <b>Parameter Values</b>                           |
|-----------------|-------------------------------|----------------------|-------------------|---------------------------------------------------|
| ExpCM           | 0.00                          | -14580.51            | 6                 | beta=2.18, kappa=7.47, omega=0.16                 |
| Goldman-Yang M5 | 4187.56                       | -16668.29            | 12                | alpha_omega=0.30,<br>beta_omega=10.00, kappa=7.15 |
| Averaged ExpCM  | 4303.74                       | -16732.38            | 6                 | beta=0.61, kappa=7.55, omega=0.02                 |
| Goldman-Yang M0 | 4371.26                       | -16761.14            | 11                | kappa=7.14, omega=0.02                            |

632

633 **FIGURE LEGENDS:**

634 **Figure 1. Deep mutational scanning (DMS) of the CVB3 capsid.**

635 **A.** Overview of the deep mutational scanning experimental approach. A mutagenesis PCR was performed  
636 using an external reverse primer and a pool of forward mutagenic primers targeting each capsid codon  
637 that encode degenerate nucleotides (NNN) at the codon matching position. Similarly, a reverse  
638 mutagenesis PCR reaction was performed. The products of these PCRs were joined using the external  
639 primers and cloned into a CVB3 infectious clone to generate the mutagenized libraries. This process was  
640 performed in triplicate, generating 3 libraries (Mut Library 1-3). Viral genomic RNA (vRNA) produced from  
641 the mutant libraries was electroporated into cells to generate high diversity CVB3 populations (Mut Virus  
642 1-3). The relative frequency of each mutation relative to the WT amino acid was then determined in both  
643 the mutagenized libraries and the resulting virus populations via high-fidelity duplex sequencing. **B.** The  
644 average rate of double or triple mutations per codon observed in the mutagenized libraries (Mut Library  
645 1-3), the resulting mutagenized virus (Mut Virus 1-3), as well as controls for the error rate of the  
646 amplification and sequencing process (PCR and RT-PCR) or the WT unmutagenized virus (WT Virus 1-2).  
647 Single mutations per codon were omitted from the analysis to increase the signal-to-noise ratio. **C.** Venn  
648 diagram showing the number of amino acid mutations observed in the mutagenized libraries.

649

650 **Figure 2. Mutational fitness effects across the CVB3 capsid and their correlation with structural,**  
651 **evolutionary, and immunological attributes.**

652 **A.** Overview of the mutational fitness effects (MFE) across the CVB3 capsid. Bottom: a heatmap  
653 representing the MFE of all mutations observed at each capsid site. Green indicates no data available  
654 (ND), and the positions of the mature viral proteins (VP1-4) or antibody neutralization sites (nAb) are  
655 indicated above. Top: A 21 amino acid sliding window analysis of the average sequence variation in CVB3

656 genomes (Shannon entropy; black line) or the average MFE (red line). **B.** Correlation between derived MFE  
657 and variation in enterovirus B sequence alignments (Shannon entropy). **C.** Violin plot of MFE in antibody  
658 neutralization sites versus other capsid sites. **D-G.** Boxplots of MFE as a function of secondary structure  
659 (D), position in the capsid (E), or the predicted effect of mutations on stability (F) or aggregation  
660 propensity (G). Two-sided Mann-Whitney or Kruskal-Wallis tests were used for 2 or 3 category  
661 comparisons, respectively.

662

663 **Figure 3. Prediction of MFE based on structural and sequence information.**

664 **A.** The top 10 predictors identified in a random forest model for explaining MFE in the CVB3 capsid based  
665 on the percent of mean squared error (MSE) increase. **B.** Hexagonal plot showing the correlation between  
666 MFE predicted using a random forest algorithm trained on the top 5 variables versus observed MFE. The  
667 random forest model was trained on 70% of the data, and then tested on the remaining 30% (shown).  
668 RSA, relative surface area.

669

670 **Figure 4. Antibody neutralization sites show differential selection between laboratory conditions and**  
671 **nature.**

672 **A.** Violin plot showing the sum of absolute differential selection observed at capsid sites comprising  
673 antibody neutralization epitopes (nAb) versus all other capsid sites. **B-C.** Logoplots showing the observed  
674 differential selection of sites in the EF loop or BC loop. The WT sequence is indicated in red. **D.** The CVB3  
675 capsid pentamer (PDB:4GB3), colored according to the amount of differential selection. The BC and EF  
676 loops are shown next to the structure together with the sidechains for sites showing the highest  
677 differential selection.

678 **Figure 5. Sequence preference of capsid 3CD<sup>pro</sup> cleavage sites and their use for the identification of novel**  
679 **cellular targets of the viral protease.**

680 **A.** Overview of the CVB3 capsid maturation pathway. The CVB3 capsid precursor P1 is co-translationally  
681 cleaved by the viral 2A protease. P1 is then myristoylated and cleaved by the viral 3CD<sup>pro</sup> to generate the  
682 capsid proteins VP0, VP3, and VP1. Finally, upon assembly and genome encapsidation, VP0 is further  
683 cleaved into VP4 and VP2 in a protease independent manner to generate the mature capsid. Red and  
684 black astrickses indicated 3CD<sup>pro</sup> or protease independent cleavage events, respectively. **B-C.** Logoplots  
685 showing amino acid preferences for the 10 amino acid region spanning the 3CD<sup>pro</sup> cleavage sites (P1-P'1)  
686 of both VP0/VP3 and VP3/VP1 in the DMS dataset. **D.** Overview of the bioinformatic pipeline for  
687 identification of novel 3CD<sup>pro</sup> cellular targets using the amino acid preferences for the capsid cleavage  
688 sites from our DMS study. A position-specific scoring matrix (PSSM) was generated based on the amino  
689 acid preferences for the 10 amino acid region spanning the two 3CD<sup>pro</sup> cleavages sites. This PSSM was  
690 then used to query the human genome for potential cellular targets, and non-cytoplasmic proteins were  
691 filtered out, yielding 746 proteins. **E.** The cellular proteins PLSCR1, PLEKHA4, and WDR33 are cleaved by  
692 3CD<sup>pro</sup>. Western blot analysis of cells cotransfected with 3CD<sup>pro</sup> and GFP-PLSCR1 or GFP-PLEKHA4 and  
693 probed with a GFP antibody or transfected with 3CD<sup>pro</sup> and probed using a WDR33 antibody. When  
694 indicated, the 3CD<sup>pro</sup> inhibitor rupintrivir was included to ensure cleavage was mediated by the viral  
695 protease. Red arrows indicate cleavage products of the expected size (GFP-PLSCR1 full length = 64 kDa,  
696 cleaved N-terminus = 36 kDa; GFP-PLEKHA4 full length = 118, cleaved N-terminus = 72 kDa; WDR33 full  
697 length = 146 kDa, cleaved N-terminus = 72 kDa) . \* p < 0.05, \*\*\* p < 0.001.

698

699

700



701 **Supplementary Figure S1. Sanger analysis of DMS libraries.**

702 **A.** The number of mutated codons per clone. **B.** Original and mutated base for each mutation. **C.** The  
703 number of nucleotide changes per codon. **D.** Cumulative fraction of mutations versus the codon position.  
704 **E.** Location of both mutations and indels across the capsid sequence.

705

706 **Supplementary Figure S2. Results of high-fidelity duplex sequencing.**

707 **A.** The relative frequency of the mutated base within each mutated codon. **B.** The relative frequency of  
708 each mutation type.

709

710 **Supplementary Figure S3. Correlation of amino acid preferences observed in experimental replicates.**

711 Hexagonal bin plots showing the correlation of amino acid preferences between the three experimental  
712 replicates. Spearman's correlation coefficient and p-value are shown above each plot.

713

714 **Supplementary Figure S4. Prediction of mutational fitness effects using random forest or linear models.**

715 **A.** Hexagonal bin plot showing the correlation between actual and predicted MFE derived from a random  
716 forest model using all 52 variables. The model was trained on 70% of the data and tested on the remaining  
717 30% of the data (shown). **B.** Variable importance obtained from the random forest model. **C.** Linear model  
718 using the top five parameters of the random forest model. See supplementary Table S6 for parameter  
719 description.

720

721

722 **Supplementary Figure S5. Sequence preferences of capsid encoded motifs**

723 **A.** Amino acid preferences of the CVB3 myristoylation motif. The canonical Prosite myristoylation motif  
724 is indicated above, with curly brackets indicating disfavored amino acids and square brackets indicating  
725 tolerated amino acids. **B.** WCPRP motif required for 3CD<sup>pro</sup> cleavage of P1. Asterisks indicate analogous  
726 positions in FMDV shown to be essential for viability <sup>26</sup>.

727

728 **Supplementary Figure S6. Evaluation of select hits identified as potential 3CD<sup>pro</sup> target proteins.**

729 Western blots of cells transfected with 3CD<sup>pro</sup> and probed for the indicated endogenous protein, or  
730 cotransfected with 3CD<sup>pro</sup> and the indicated fusion protein and blotted for the tag. Each experiment was  
731 performed twice. When indicated, the 3C<sup>pro</sup> inhibitor rupintrivir was added.

732

Figure 1. Mattenberger et al.

**A**

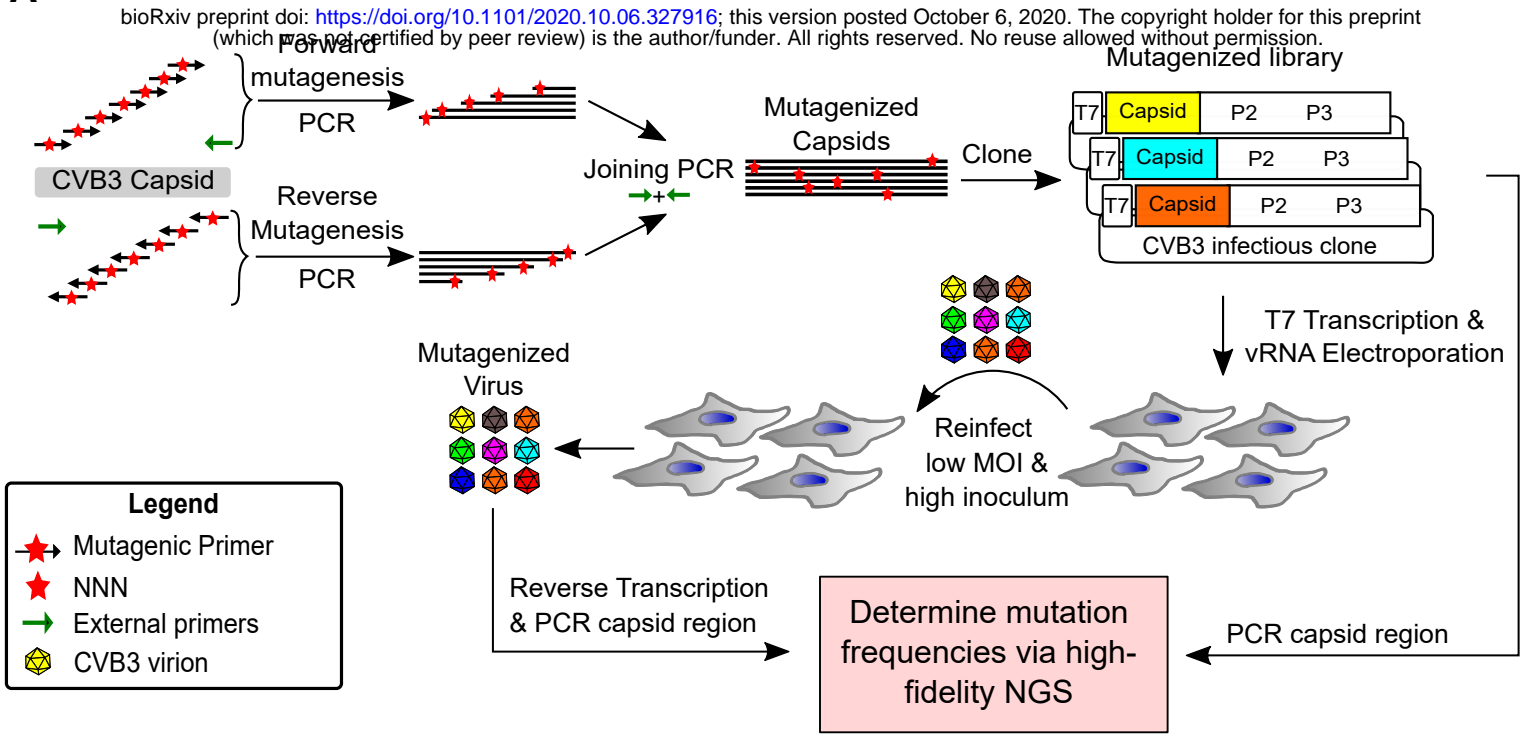

**B**

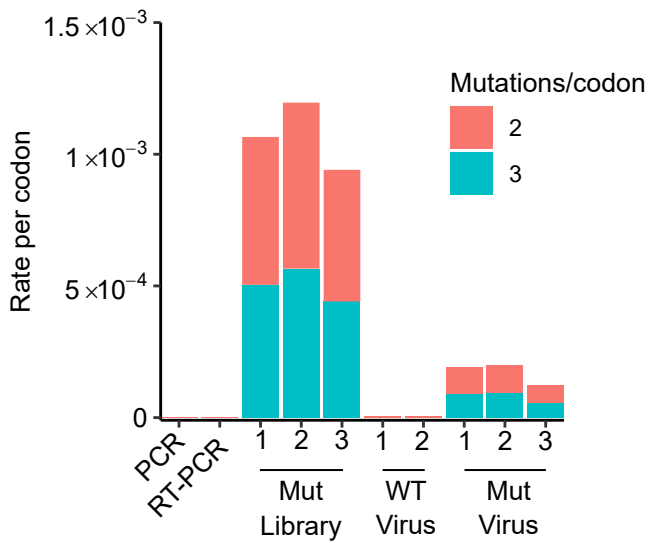

**C**

**Observed amino acid mutations in mutagenized libraries**

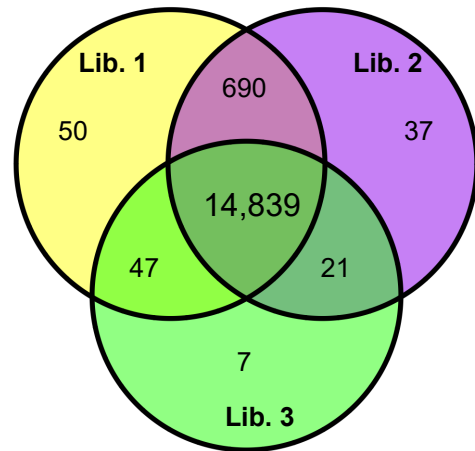

851 Sites x 19 AA mutations = 16,169 possible AA mutations

Figure 2. Mattenberger et al.

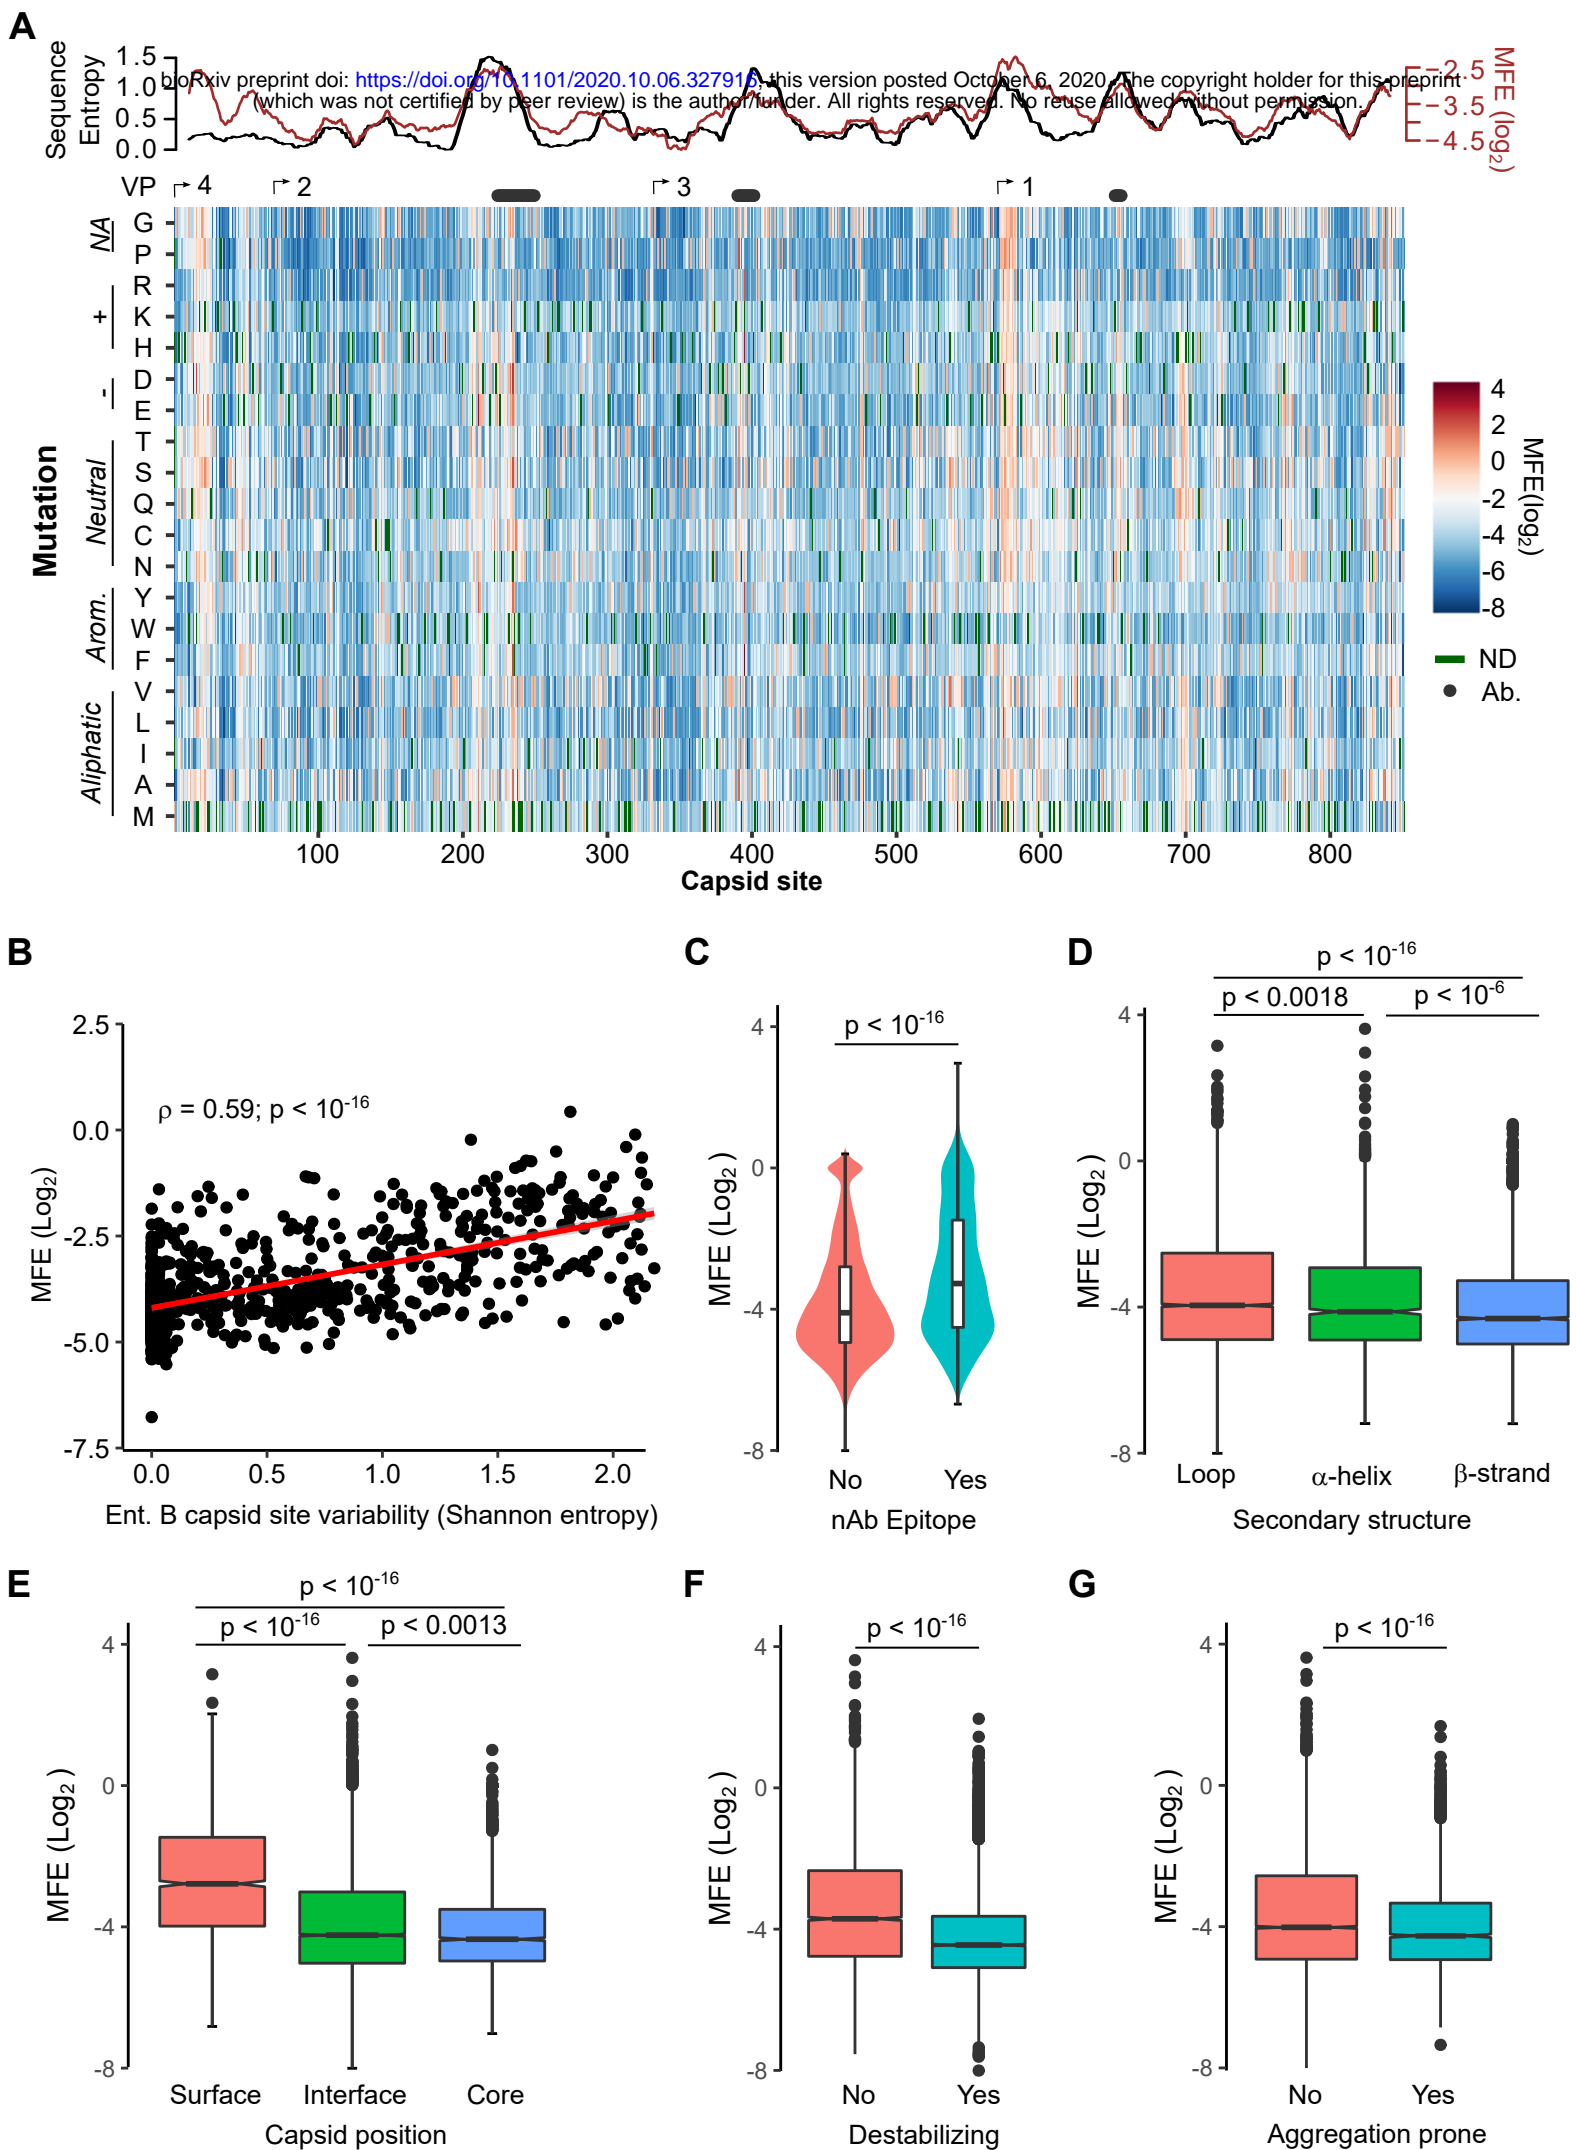

Figure 3. Mattenberger et al.

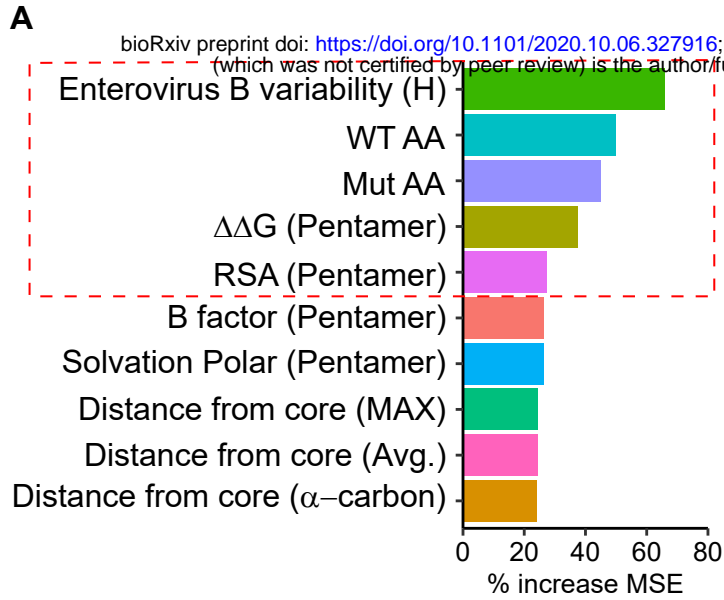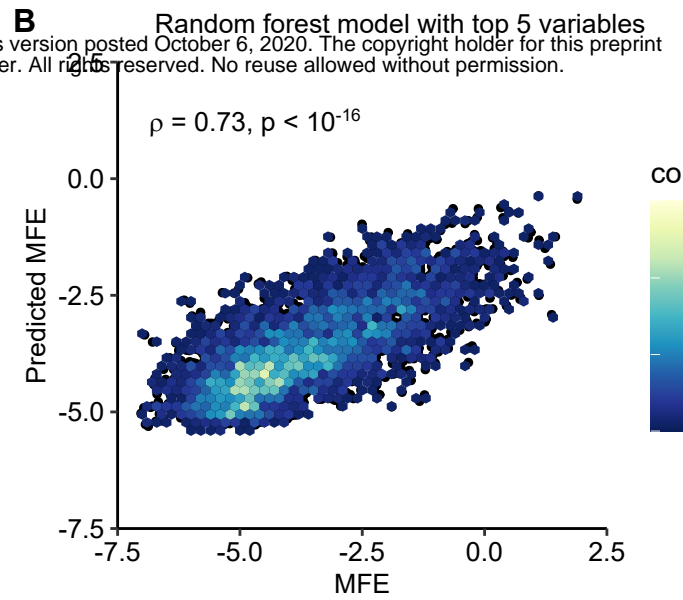

Figure 4. Mattenberger et al.

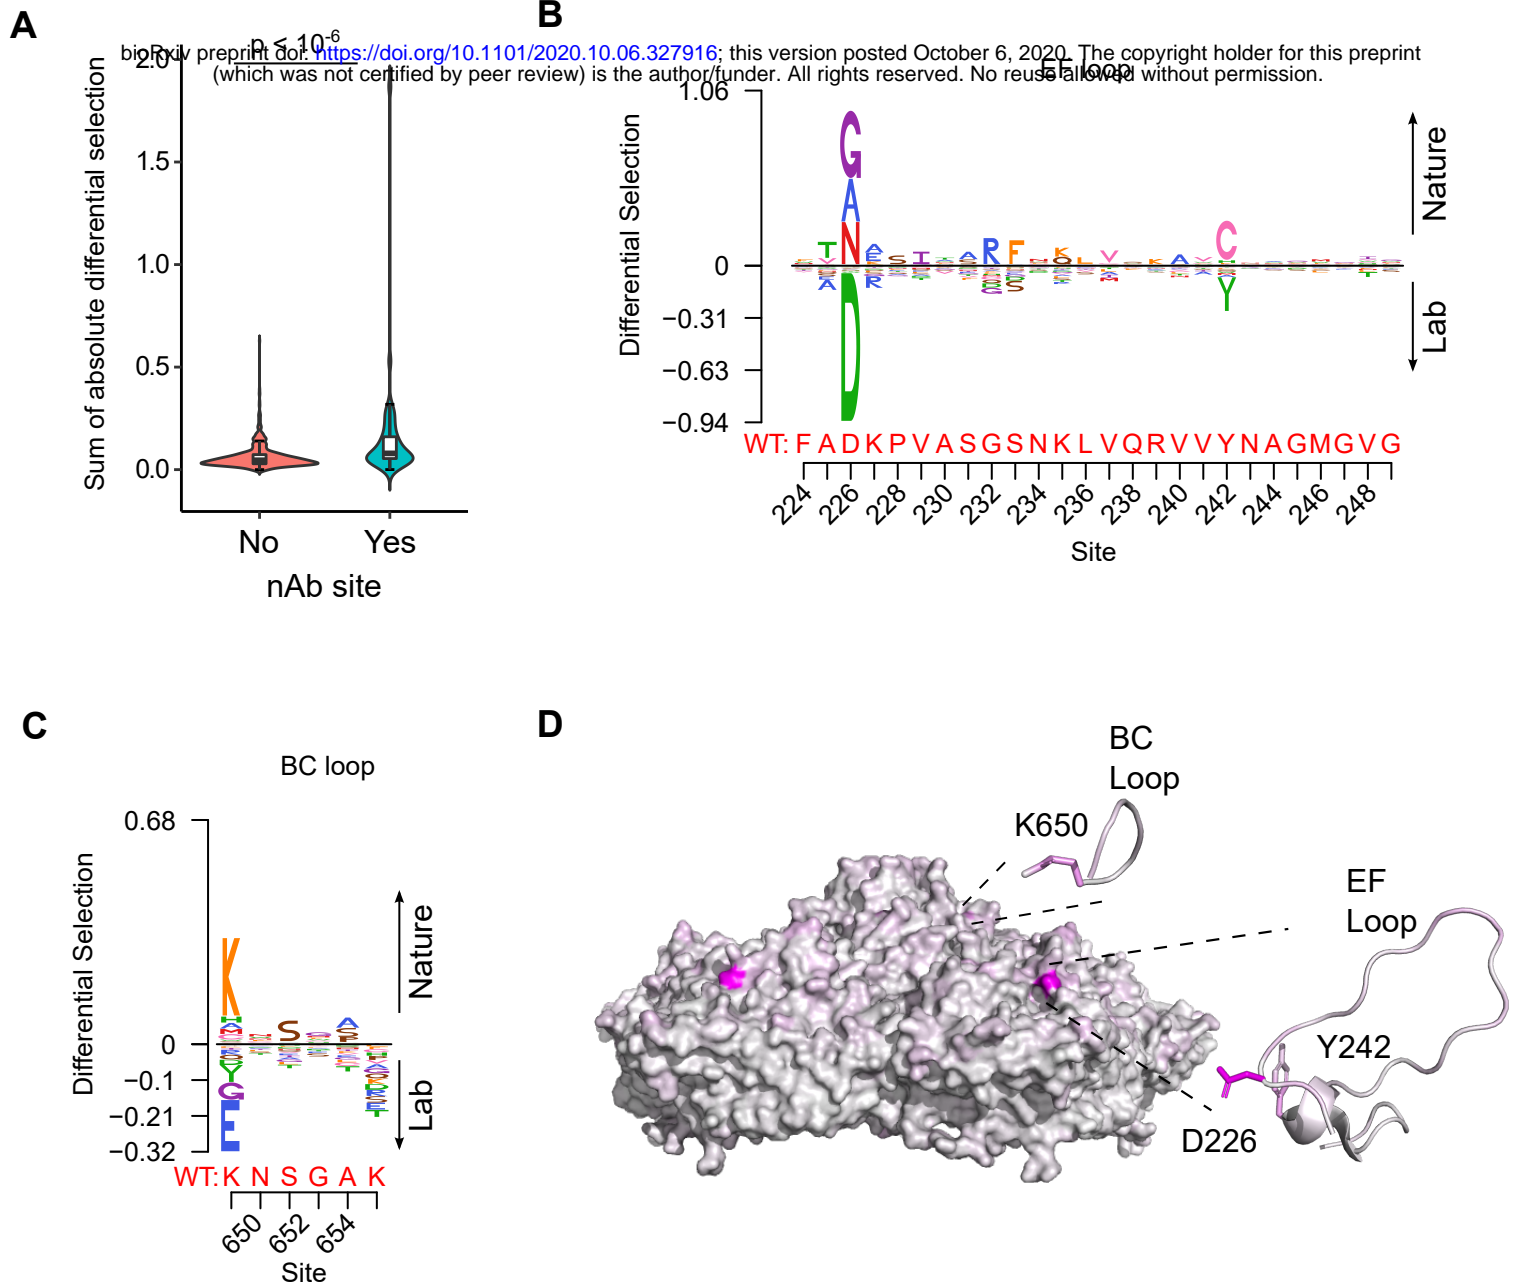



Figure S1. Mattenberger et al.

**A**

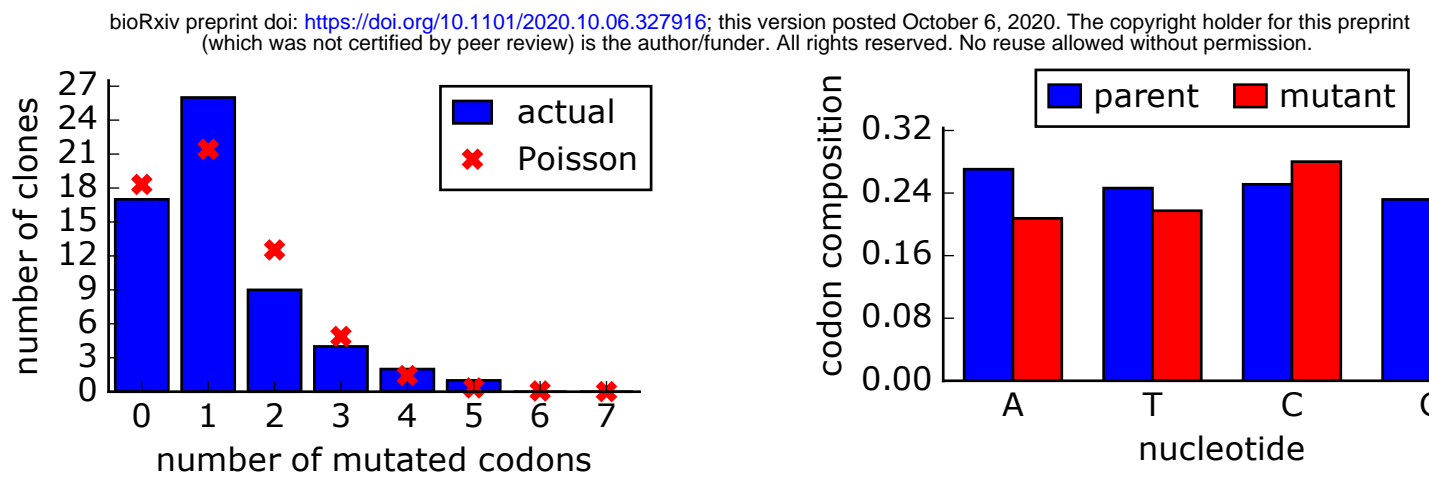

**B**

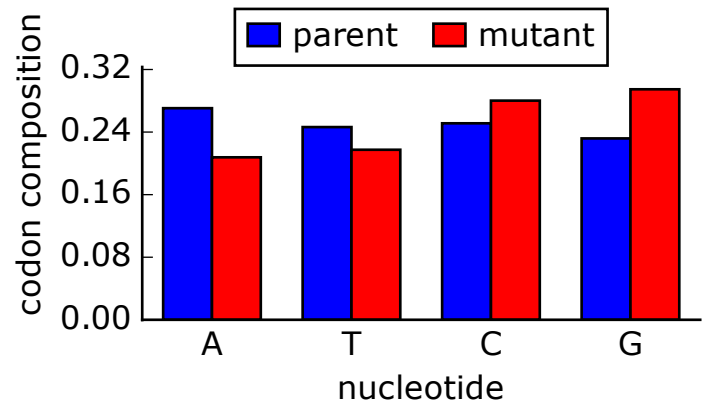

**C**

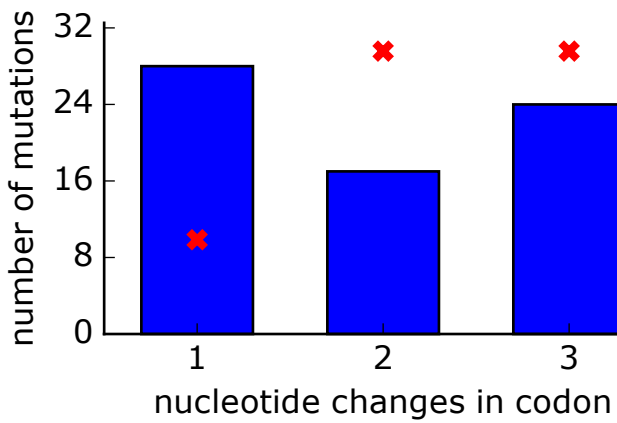

**D**

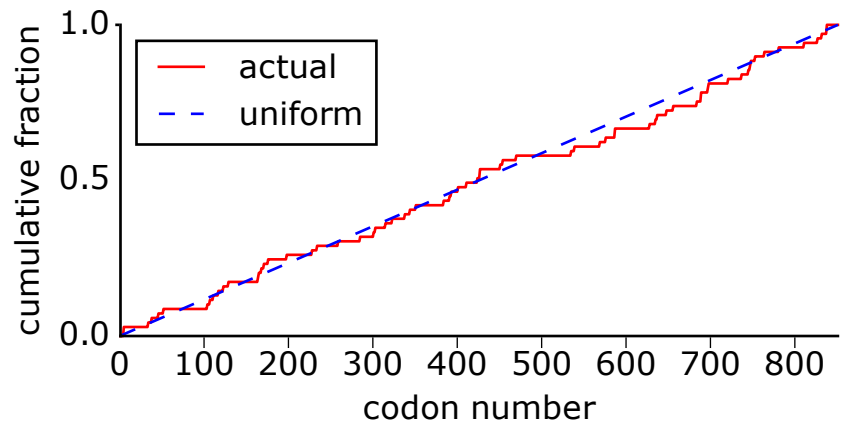

**E**

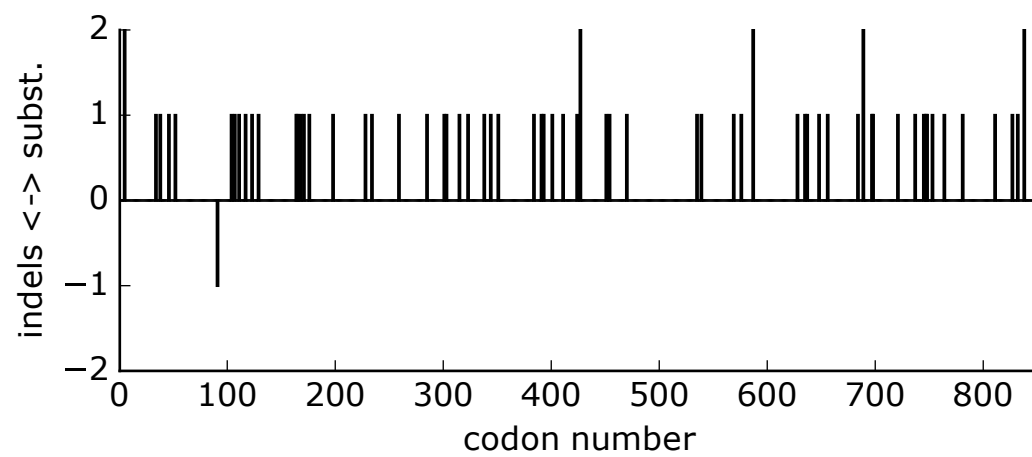



Figure S2. Mattenberger et al.

**A**

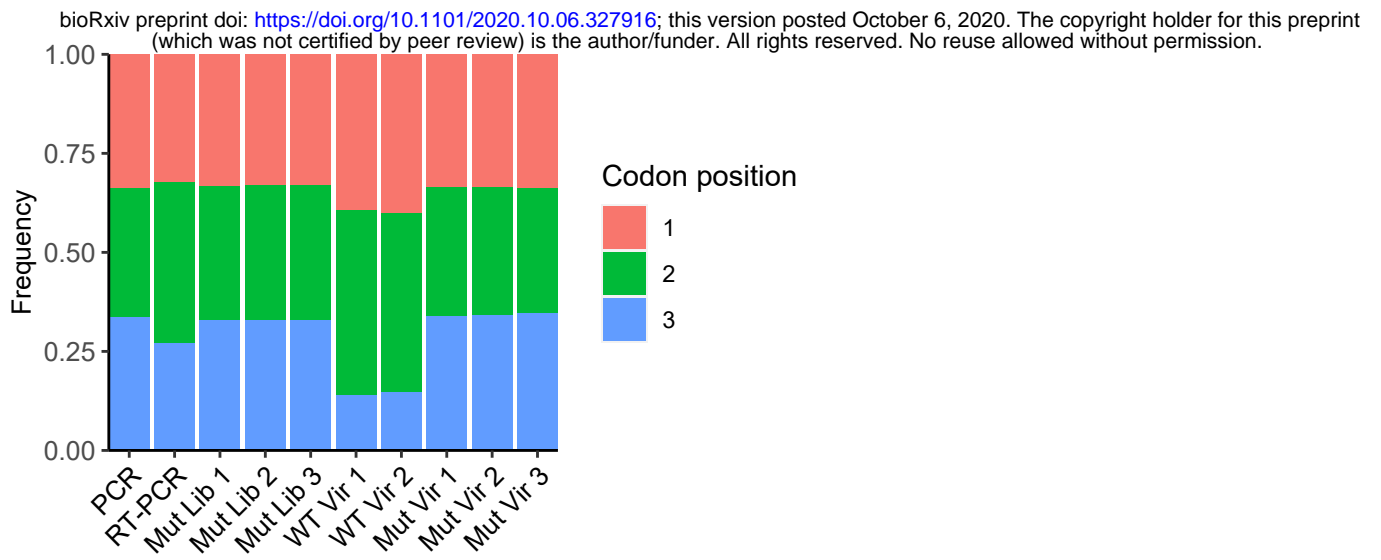

**B**

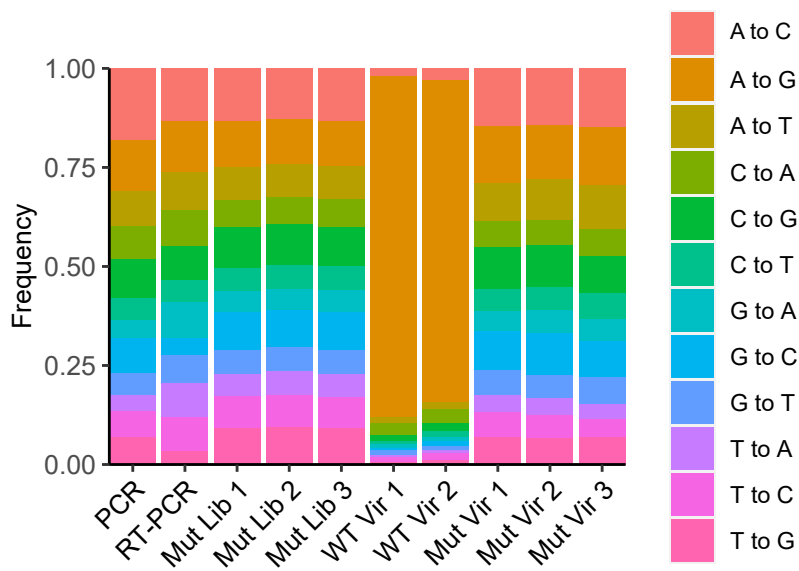



Figure S4. Mattenberger et al.

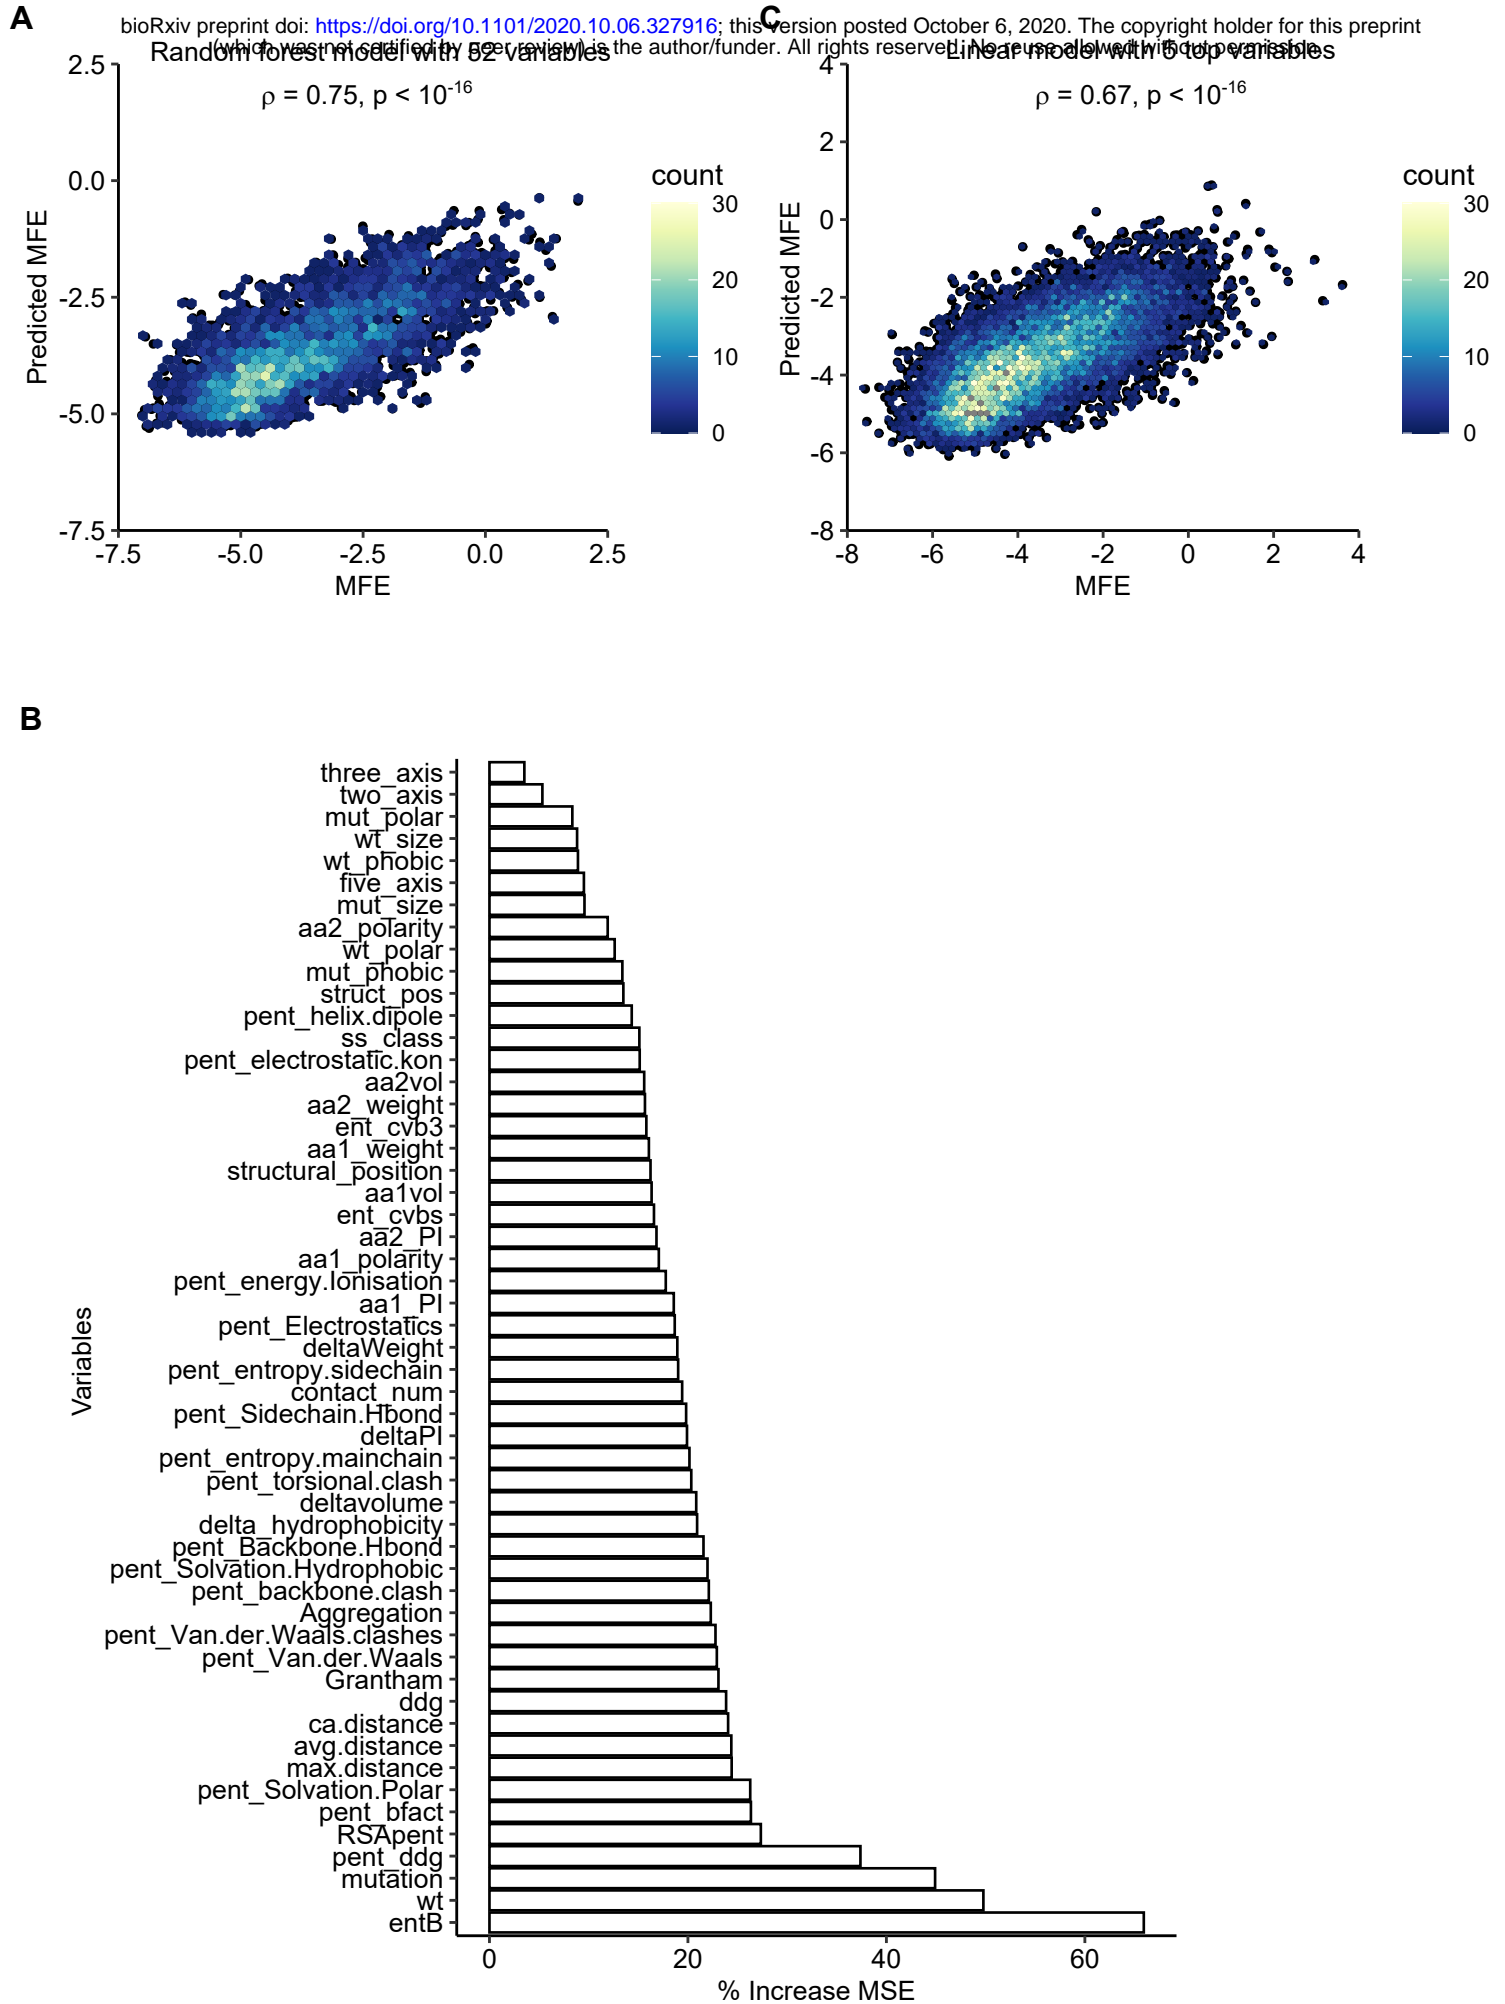

Figure S5. Mattenberger et al.

**A**

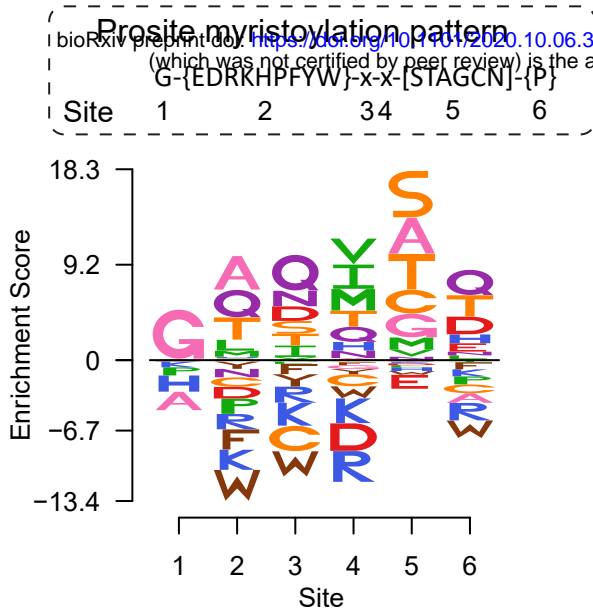

**B**

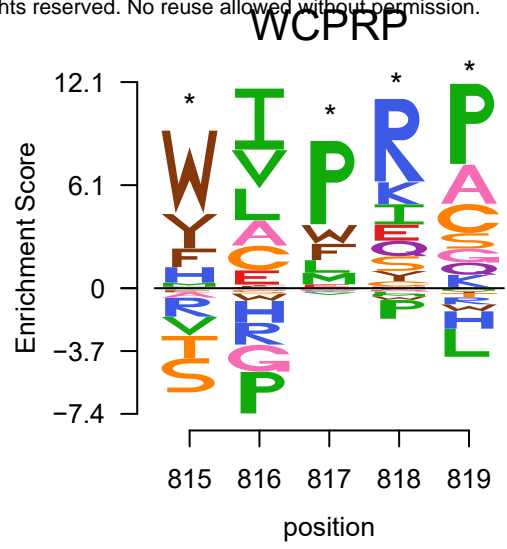

bioRxiv preprint doi: <https://doi.org/10.1101/2020.10.06.327916>; this version posted October 6, 2020. The copyright holder for this preprint (which was not certified by peer review) is the author/funder. All rights reserved. No reuse allowed without permission.
