# Supplementary material for: Globally defining the effects of mutations in a picornavirus capsid
Source: bioRxiv preprint, doi:10.1101/2020.10.06.327916, version 1 (2020-10-06)
Supplement: Supplementary data 4 [file 327916_file06.csv]

mutant	site	wildtype	mutation	mut virus 1 preferences	mut virus 1 MFE	mut virus 1 MFE (log2)	mut virus 2 preferences	mut virus 2 MFE	mut virus 2 MFE (log2)	mut virus 3 preferences	mut virus 3 MFE	mut virus 3 MFE (log2)
M1A	1	M	A	0.004698173	0.005755644	-7.440806914	0.004607529	0.005646828	-7.468343485	0.002259951	0.002806527	-8.476998295
M1C	1	M	C	0.007524634	0.00921829	-6.761285175	0.009688459	0.011873841	-6.396069511	0.006118674	0.007598493	-7.040071016
M1D	1	M	D	0.006001462	0.007352279	-7.087592725	0.008294825	0.010165851	-6.620125138	0.006554679	0.008139947	-6.940764817
M1E	1	M	E	0.016259126	0.019918754	-5.649728794	0.005834773	0.007150896	-7.127660265	0.006358848	0.007896754	-6.984524488
M1F	1	M	F	0.006061219	0.007425486	-7.073298741	0.007990227	0.009792547	-6.674100166	0.003374745	0.004190937	-7.898511373
M1G	1	M	G	0.007688748	0.009419342	-6.730158021	0.004189735	0.005134795	-7.605477552	0.015482701	0.019227237	-5.700704727
M1H	1	M	H	0.00344194	0.004216657	-7.889684561	0.002393469	0.002933354	-8.413233307	0.002950257	0.003663785	-8.092449344
M1I	1	M	I	NA	NA	NA	NA	NA	NA	NA	NA	NA
M1K	1	M	K	0.015932577	0.019518705	-5.67899887	0.022127969	0.027119276	-5.204537551	0.035291228	0.043826514	-4.512052257
M1L	1	M	L	0.001855249	0.002272831	-8.781293861	0.00251962	0.003087959	-8.339130602	0.012592978	0.015638626	-5.998742428
M1M	1	M	M	0.816272272	1	0	0.815949869	1	0	0.805248347	1	0
M1N	1	M	N	0.007649867	0.00937171	-6.737471995	0.023763677	0.029123942	-5.101650531	0.005284693	0.006562811	-7.251470354
M1P	1	M	P	0.001855656	0.002273329	-8.780977512	0.001219837	0.00149499	-9.385648323	0.002720417	0.003378358	-8.209461916
M1Q	1	M	Q	0.014824591	0.018161331	-5.782986231	0.018808135	0.023050602	-5.439051784	0.013894375	0.017254769	-5.856860997
M1R	1	M	R	0.007994891	0.009794393	-6.673828188	0.003372522	0.004133247	-7.918508788	0.006796846	0.008440683	-6.888424614
M1S	1	M	S	0.005302944	0.006496539	-7.266113051	0.001931496	0.002367174	-8.722618344	0.002118453	0.002630808	-8.570278524
M1T	1	M	T	0.001794992	0.002199012	-8.828929041	0.00303146	0.003715253	-8.072323982	0.001377523	0.001710681	-9.191213505
M1V	1	M	V	0.006483524	0.007942845	-6.976128381	0.004043411	0.004955465	-7.656763868	0.004950508	0.006147803	-7.345713299
M1W	1	M	W	0.0086884	0.010643997	-6.553816171	0.006560116	0.008039852	-6.95861532	0.009823156	0.012198914	-6.357103431
M1Y	1	M	Y	0.00699861	0.008573867	-6.865838229	0.007949779	0.009742975	-6.681421877	0.005202115	0.006460262	-7.27419157
G2A	2	G	A	0.005764602	0.011394674	-6.455496495	0.009676857	0.015031872	-6.055831463	0.004802836	0.006958765	-7.166952978
G2C	2	G	C	0.036778528	0.072698752	-3.781925584	0.033728671	0.052393568	-4.254466469	0.010413464	0.015087929	-6.050461356
G2D	2	G	D	0.0114815	0.022695055	-5.461478211	0.026218206	0.040726934	-4.617872973	0.015186127	0.022002977	-5.506157451
G2E	2	G	E	0.021160913	0.041827993	-4.579387419	0.015094785	0.023447993	-5.414391756	0.032041018	0.046423804	-4.428991458
G2F	2	G	F	0.051645609	0.10208596	-3.292143628	0.016340051	0.025382369	-5.300029483	0.015981421	0.023155267	-5.432515796
G2G	2	G	G	0.505903152	1	0	0.643755938	1	0	0.690185116	1	0
G2H	2	G	H	0.014645415	0.028949049	-5.110340244	0.004721445	0.007334215	-7.091141672	0.002747285	0.003980504	-7.972833072
G2I	2	G	I	0.018451293	0.036471987	-4.777067377	0.043047448	0.066869206	-3.902514211	0.022286144	0.032290096	-4.952764456
G2K	2	G	K	0.011608359	0.022945813	-5.445625292	0.012281894	0.019078494	-5.711908866	0.013508796	0.019572714	-5.675012348
G2L	2	G	L	0.042109707	0.083236696	-3.586636486	0.014584947	0.022656019	-5.463961826	0.016727995	0.024236969	-5.366646903
G2M	2	G	M	0.017775543	0.035136257	-4.830895663	0.021934876	0.03407328	-4.875215361	0.014733442	0.021347087	-5.549816992
G2N	2	G	N	0.023766625	0.046978607	-4.411852249	0.032878266	0.051072563	-4.291307716	0.019572139	0.028357812	-5.140109989
G2P	2	G	P	0.011282709	0.022302113	-5.486675804	0.019173028	0.029783069	-5.069363741	0.004042603	0.005857273	-7.415555155
G2Q	2	G	Q	0.035321471	0.069818641	-3.840243906	0.011252417	0.017479322	-5.838206978	0.031318479	0.045376926	-4.461897316
G2R	2	G	R	0.029330338	0.057976192	-4.108395616	0.019490585	0.030276358	-5.045664532	0.006378372	0.009241537	-6.757651408
G2S	2	G	S	0.023183355	0.045825678	-4.447699956	0.026161477	0.040638813	-4.62099791	0.025080301	0.036338513	-4.782356788
G2T	2	G	T	0.026196077	0.051780814	-4.271438548	0.014222629	0.0220932	-5.500253774	0.024307909	0.035219405	-4.827485665
G2V	2	G	V	0.027141164	0.053648933	-4.220306713	0.017667883	0.027445002	-5.187312749	0.038753734	0.056149768	-4.154576126
G2W	2	G	W	0.055550791	0.109805188	-3.186981881	0.003571435	0.005547808	-7.493866312	0.005599213	0.008112625	-6.945615394
G2Y	2	G	Y	0.030902847	0.061084512	-4.033049553	0.014197164	0.022053643	-5.502839186	0.006333606	0.009176678	-6.767812323
A3A	3	A	A	0.251532558	1	0	0.403865951	1	0	0.197966979	1	0
A3C	3	A	C	0.01188215	0.047239015	-4.403877296	0.022569449	0.055883515	-4.161433429	0.013042311	0.065881245	-3.923988373
A3D	3	A	D	0.010778891	0.042852867	-4.544464458	0.019209614	0.047564331	-4.393976109	0.01070721	0.054085841	-4.208605236
A3E	3	A	E	0.023784449	0.094558133	-3.402654638	0.064516048	0.159746192	-2.646146551	0.008075151	0.040790392	-4.615626807
A3F	3	A	F	0.011720744	0.046597323	-4.42360912	0.004569948	0.011315508	-6.465554814	0.005896678	0.029786167	-5.069213706
A3G	3	A	G	0.062873365	0.249961142	-2.00022426	0.01203954	0.029810733	-5.068024364	0.001903893	0.009617227	-6.700163293
A3H	3	A	H	0.10435203	0.414864903	-1.269286481	0.001814254	0.004492217	-7.798356531	0.001072721	0.005418688	-7.527840576
A3I	3	A	I	0.019176481	0.076238564	-3.71333524	0.006297658	0.015593437	-6.002917275	0.050750945	0.256360658	-1.963753215
A3K	3	A	K	0.014242476	0.056622793	-4.142473263	0.005420663	0.013421936	-6.219263399	0.002937634	0.014839012	-6.074461145
A3L	3	A	L	0.105509173	0.419465273	-1.253376718	0.049764302	0.12321985	-3.020693413	0.030430235	0.153713692	-2.701682419
A3M	3	A	M	0.094821999	0.376977039	-1.407451442	0.031607525	0.078262415	-3.675536552	0.012619482	0.063745391	-3.971535165
A3N	3	A	N	0.02021586	0.080370749	-3.637185657	0.028681936	0.071018455	-3.815662211	0.001750748	0.008843636	-6.821144572
A3P	3	A	P	0.010274599	0.040847988	-4.613591162	0.020160297	0.049918289	-4.324287698	0.00087043	0.004396847	-7.829315083
A3Q	3	A	Q	0.083983803	0.3338884	-1.582562121	0.076462273	0.189325872	-2.401056519	0.401066813	2.025927835	1.018582785
A3R	3	A	R	0.01715497	0.068201786	-3.874046665	0.006043977	0.014965305	-6.062234463	0.008917369	0.045044731	-4.472497831
A3S	3	A	S	0.052794507	0.209891347	-2.252285404	0.034456622	0.085316976	-3.55102336	0.007026384	0.035492708	-4.816333554
A3T	3	A	T	0.049110688	0.195245848	-2.356636224	0.126063352	0.312141571	-1.679727588	0.221050931	1.116605061	0.159119
A3V	3	A	V	0.025777163	0.102480424	-3.286579746	0.075715384	0.187476522	-2.415218163	0.002856678	0.014430073	-6.114777614
A3W	3	A	W	0.003325512	0.013220999	-6.241025025	0.003855898	0.009547469	-6.710665946	0.002306557	0.01165122	-6.423375197
A3Y	3	A	Y	0.02668858	0.106103879	-3.236450697	0.00688531	0.017048502	-5.874211187	0.018750848	0.094717051	-3.400232028
Q4A	4	Q	A	0.039163347	0.171577457	-2.54306808	0.031366335	0.079576719	-3.651509776	0.026012511	0.073046703	-3.775037039
Q4C	4	Q	C	0.002108608	0.009237964	-6.758209311	0.006405648	0.016251195	-5.943310344	0.00822299	0.023091284	-5.436507807
Q4D	4	Q	D	0.099495592	0.435897386	-1.197939542	0.0058494	0.01483999	-6.074366094	0.131857814	0.370274844	-1.433331557
Q4E	4	Q	E	0.075861833	0.332356178	-1.589197922	0.006555369	0.01663104	-5.909977822	0.011816677	0.033182852	-4.913418285
Q4F	4	Q	F	0.016226454	0.071089268	-3.814224411	0.018697914	0.047436803	-4.397849408	0.008984003	0.025228314	-5.308812411
Q4G	4	Q	G	0.031932397	0.139898142	-2.837551297	0.037173135	0.09430863	-3.406466396	0.014782436	0.041511109	-4.590358726
Q4H	4	Q	H	NA	NA	NA	NA	NA	NA	NA	NA	NA
Q4I	4	Q	I	0.0800907	0.35088315	-1.510937426	0.071117779	0.180426545	-2.47051649	0.042791406	0.120164141	-3.056921653
Q4K	4	Q	K	0.009713025	0.042553466	-4.554579535	0.004184748	0.010616749	-6.557514184	0.003279734	0.009209944	-6.762591893
Q4L	4	Q	L	0.02179195	0.095472107	-3.388776884	0.017297105	0.043882935	-4.510196166	0.024962746	0.070098816	-3.834466103
Q4M	4	Q	M	0.025080489	0.109879435	-3.186006695	0.012838529	0.032571482	-4.940246837	0.037925409	0.106499756	-3.231077972
Q4N	4	Q	N	0.102183282	0.447672348	-1.159484885	0.041760128	0.105945878	-3.238600636	0.107948634	0.303134585	-1.721969636
Q4P	4	Q	P	0.037347556	0.163622344	-2.611558324	0.045853312	0.116330328	-3.103700832	0.013676681	0.038405997	-4.7025246
Q4Q	4	Q	Q	0.22825462	1	0	0.394164725	1	0	0.356107946	1	0
Q4R	4	Q	R	0.003608847	0.01581062	-5.982962226	0.01950208	0.04947698	-4.337098756	0.007041406	0.019773234	-5.660307305
Q4S	4	Q	S	0.052549777	0.230224373	-2.118887522	0.099856791	0.253337717	-1.980866214	0.053885639	0.151318273	-2.724341877
Q4T	4	Q	T	0.093875098	0.411273595	-1.281829644	0.085786802	0.217642008	-2.199971053	0.01688035	0.047402341	-4.398897878
Q4V	4	Q	V	0.017457843	0.076484074	-3.708696819	0.026355723	0.066864744	-3.902610477	0.076485626	0.214782138	-2.219054078
Q4W	4	Q	W	0.010348438	0.045337254	-4.463159163	0.002033193	0.005158231	-7.598908033	0.004093831	0.01149604	-6.442719258
Q4Y	4	Q	Y	0.009605327	0.042081632	-4.570665545	0.025007593	0.063444523	-3.978360567	0.005175909	0.014534664	-6.104358478
V5A	5	V	A	0.026841343	0.174392032	-2.519593968	0.061439881	0.334626004	-1.579378534	0.030913888	0.168703572	-2.567437576
V5C	5	V	C	0.009483524	0.061615806	-4.020555692	0.001643438	0.008950818	-6.803764801	0.030579112	0.166876627	-2.583146188
V5D	5	V	D	0.005202075	0.033798624	-4.886891696	0.004885066	0.026606008	-5.232104101	0.003203366	0.017481438	-5.838032325
V5E	5	V	E	0.043035234	0.279606056	-1.838532486	0.020772972	0.113137858	-3.143846336	0.024030481	0.131139373	-2.930827193
V5F	5	V	F	0.058830029	0.382227093	-1.387498052	0.002000567	0.010895881	-6.520073274	0.004536219	0.024755096	-5.336130625
V5G	5	V	G	0.026589718	0.172757189	-2.533182352	0.019970495	0.108767252	-3.200683839	0.014922503	0.08143523	-3.618203129
V5H	5	V	H	0.032197668	0.209192843	-2.257094602	0.118367549	0.644676697	-0.633352259	0.012471914	0.068061849	-3.877009853
V5I	5	V	I	0.085478076	0.555363256	-0.848496365	0.094166229	0.512866696	-0.963344203	0.291127765	1.588745259	0.66788782
V5K	5	V	K	0.004459707	0.02897535	-5.109030095	0.003147381	0.017141885	-5.866330409	0.00828376	0.045206218	-4.467334972
V5L	5	V	L	0.051940738	0.337466385	-1.56718429	0.024754089	0.134820602	-2.890887126	0.019762568	0.107848479	-3.212922266
V5M	5	V	M	0.029152924	0.189410707	-2.400410205	0.323681717	1.762899224	0.817950005	0.04001779	0.218385474	-2.195051199
V5N	5	V	N	0.097855036	0.635778129	-0.653404707	0.037804425	0.205897919	-2.279998845	0.014645238	0.079922134	-3.645261088
V5P	5	V	P	0.054026855	0.351020183	-1.51037411	0.031401353	0.171024244	-2.547727242	0.015851762	0.086506391	-3.531049463
V5Q	5	V	Q	0.134548209	0.874178908	-0.193999525	0.014451846	0.078710493	-3.667300209	0.10402567	0.567689895	-0.816825034
V5R	5	V	R	0.002578229	0.016751121	-5.899598581	0.004801727	0.026152112	-5.256928717	0.003741797	0.020419772	-5.613889408
V5S	5	V	S	0.037803638	0.245615628	-2.025525734	0.030148925	0.164203024	-2.606447399	0.005379242	0.029355654	-5.09021779
V5T	5	V	T	0.060047917	0.390139883	-1.357936604	0.019728804	0.107450904	-3.21825047	0.184440211	1.006528907	0.009388607
V5V	5	V	V	0.153913813	1	0	0.183607612	1	0	0.183243829	1	0
V5W	5	V	W	0.031585979	0.205218609	-2.284766533	0.002021302	0.011008811	-6.505197494	0.007219803	0.03939998	-4.665661296
V5Y	5	V	Y	0.054429289	0.353634856	-1.499667612	0.001204622	0.006560852	-7.251901137	0.00160308	0.008748346	-6.836773937
S6A	6	S	A	0.159044685	0.519771842	-0.944049616	0.106085566	0.289453344	-1.78859727	0.212224546	0.712804653	-0.488421341
S6C	6	S	C	0.087021771	0.284394706	-1.814033487	0.113398525	0.309406675	-1.692423772	0.011092926	0.037258129	-4.746300956
S6D	6	S	D	0.0252439	0.082499259	-3.59947503	0.002927173	0.00798676	-6.968173901	0.001522899	0.005115006	-7.611048334
S6E	6	S	E	0.00381247	0.012459483	-6.326612041	0.006860602	0.018719081	-5.739346564	0.007009622	0.023543417	-5.408532452
S6F	6	S	F	0.025688113	0.083950984	-3.57430896	0.014503736	0.03957329	-4.659329189	0.003173519	0.010658988	-6.551785754
S6G	6	S	G	0.064541256	0.210926431	-2.245188208	0.0558655	0.152428426	-2.713796119	0.088085294	0.295854596	-1.757039787
S6H	6	S	H	0.010433877	0.034098815	-4.874134604	0.007970195	0.021746593	-5.523066764	0.007404884	0.024870997	-5.329391831
S6I	6	S	I	0.033177997	0.108428576	-3.20518307	0.012743747	0.034771178	-4.845964247	0.007790066	0.026164717	-5.256233527
S6K	6	S	K	0.006466576	0.021133331	-5.564335999	0.015329651	0.04182679	-4.579428908	0.032223775	0.108230915	-3.207815451
S6L	6	S	L	0.007795486	0.025476324	-5.294699061	0.013123271	0.035806706	-4.803626392	0.006507574	0.021857174	-5.515749287
S6M	6	S	M	0.017273919	0.056452666	-4.146814469	0.036491315	0.099566167	-3.328200592	0.040992477	0.137682604	-2.860581801
S6N	6	S	N	0.030997717	0.101303232	-3.303247896	0.023074898	0.062959615	-3.989429477	0.010517824	0.035326515	-4.823104748
S6P	6	S	P	0.027704348	0.090540217	-3.465297432	0.020104445	0.054854766	-4.188239226	0.004671972	0.015691885	-5.993837534
S6Q	6	S	Q	0.013331161	0.04356739	-4.520607489	0.017723153	0.048357435	-4.370118463	0.006150443	0.020657668	-5.597178764
S6R	6	S	R	0.016398137	0.053590535	-4.221877981	0.012508852	0.03413027	-4.872804362	0.002829662	0.009504065	-6.71723952
S6S	6	S	S	0.30598942	1	0	0.366503163	1	0	0.297731707	1	0
S6T	6	S	T	0.110180087	0.360078092	-1.47361827	0.139883001	0.381669287	-1.389604999	0.21523322	0.722909971	-0.468112105
S6V	6	S	V	0.035124451	0.114789755	-3.12293421	0.028444915	0.07761165	-3.687582957	0.01064995	0.035770293	-4.805094269
S6W	6	S	W	0.007733345	0.025273242	-5.306245476	0.004594598	0.012536313	-6.317743114	0.013102774	0.04400866	-4.506068731
S6Y	6	S	Y	0.012041286	0.039351969	-4.667420366	0.001863694	0.005085068	-7.619517186	0.021084868	0.070818349	-3.819732977
T7A	7	T	A	0.024520079	0.17763545	-2.493008573	0.026627666	0.161037378	-2.634532504	0.001102761	0.00840513	-6.894514172
T7C	7	T	C	0.008407461	0.06090776	-4.037230145	0.047036277	0.284463493	-1.813684581	0.001498202	0.011419143	-6.452401833
T7D	7	T	D	0.107605114	0.77954408	-0.359297491	0.210880963	1.275354653	0.35089849	0.021194644	0.161543405	-2.630006245
T7E	7	T	E	0.109808567	0.795506976	-0.330053513	0.003711693	0.022447381	-5.477309078	0.068105841	0.519095728	-0.94592748
T7F	7	T	F	0.038988181	0.282449458	-1.823935364	0.022551492	0.136385714	-2.874235566	0.000536087	0.004086003	-7.935094128
T7G	7	T	G	0.031508944	0.228266203	-2.131210821	0.047515174	0.287359737	-1.799070162	0.016318921	0.124381141	-3.007160333
T7H	7	T	H	0.050968542	0.369241052	-1.437365136	0.041851965	0.253110086	-1.982163096	0.09495983	0.723774073	-0.466388666
T7I	7	T	I	0.026986694	0.195504814	-2.354723963	0.042125468	0.254764161	-1.972765753	0.012322757	0.093922789	-3.412380945
T7K	7	T	K	0.003675505	0.026627153	-5.230958026	0.004676935	0.02828492	-5.143823099	0.052658132	0.401354879	-1.317049659
T7L	7	T	L	0.054283859	0.39325883	-1.346448936	0.077661051	0.469674369	-1.090267229	0.012164599	0.092717325	-3.43101724
T7M	7	T	M	NA	NA	NA	NA	NA	NA	NA	NA	NA
T7N	7	T	N	0.070420082	0.510157519	-0.970985325	0.025313728	0.153091017	-2.707538463	0.049246187	0.375349383	-1.413693982
T7P	7	T	P	0.026525101	0.192160805	-2.379613994	0.017510572	0.105899502	-3.239232285	0.013058878	0.099533426	-3.32867509
T7Q	7	T	Q	0.131379825	0.951779721	-0.071300378	0.068737539	0.415707226	-1.266360269	0.369435482	2.815799319	1.493544517
T7R	7	T	R	0.014097273	0.102127544	-3.291556085	0.010976163	0.066381051	-3.91308472	0.0041593	0.031701756	-4.979293441
T7S	7	T	S	0.071255276	0.516208073	-0.95397539	0.022682614	0.137178702	-2.865871585	0.023871655	0.181947302	-2.458407435
T7T	7	T	T	0.138035958	1	0	0.16535084	1	0	0.131200927	1	0
T7V	7	T	V	0.009064291	0.065666155	-3.928706217	0.076835452	0.464681352	-1.105686345	0.010703517	0.08158111	-3.615621057
T7W	7	T	W	0.006573864	0.047624283	-4.392158819	0.003856021	0.023320237	-5.422273714	0.020892879	0.159243382	-2.650694677
T7Y	7	T	Y	0.025758641	0.186608198	-2.421915725	0.039271718	0.237505404	-2.073967754	0.044192649	0.336831832	-1.56989961
Q8A	8	Q	A	0.045191005	0.165109415	-2.598505702	0.045282844	0.141152532	-2.824673091	0.043382318	0.084721404	-3.561129687
Q8C	8	Q	C	0.037589065	0.137335042	-2.864228313	0.046349949	0.144478838	-2.791069905	0.013023294	0.025433213	-5.297142433
Q8D	8	Q	D	0.038334698	0.140059278	-2.835890537	0.039749421	0.123904131	-3.012703812	0.055377475	0.108146768	-3.208937547
Q8E	8	Q	E	0.053167585	0.194252568	-2.363994421	0.028767182	0.089671059	-3.479213753	0.019045538	0.037194065	-4.748783742
Q8F	8	Q	F	0.022809045	0.083334906	-3.584935281	0.019024057	0.059300468	-4.0758127	0.009221958	0.018009577	-5.795091882
Q8G	8	Q	G	0.028282297	0.103331924	-3.274642052	0.032222336	0.100441225	-3.315576561	0.049211325	0.096104882	-3.379246471
Q8H	8	Q	H	NA	NA	NA	NA	NA	NA	NA	NA	NA
Q8I	8	Q	I	0.029911636	0.10928486	-3.193834551	0.008192824	0.025538101	-5.291204937	0.00293719	0.005736043	-7.445728515
Q8K	8	Q	K	0.00385333	0.014078489	-6.150363662	0.087304248	0.272138732	-1.877585794	0.012564525	0.024537284	-5.348880633
Q8L	8	Q	L	0.03848186	0.14059695	-2.830362798	0.042835951	0.133525247	-2.904815545	0.018203274	0.035549206	-4.814038833
Q8M	8	Q	M	0.05655403	0.206625253	-2.27491151	0.004253447	0.013258549	-6.23693332	0.027328326	0.053369536	-4.22783972
Q8N	8	Q	N	0.023474639	0.085766712	-3.54343838	0.094288581	0.293909808	-1.766554591	0.039493456	0.077126839	-3.696623211
Q8P	8	Q	P	0.079865294	0.291795058	-1.776972646	0.055093086	0.171732337	-2.541766374	0.022480758	0.043902711	-4.509546165
Q8Q	8	Q	Q	0.27370338	1	0	0.320807875	1	0	0.51205853	1	0
Q8R	8	Q	R	0.013888978	0.050744636	-4.300600857	0.012482979	0.038911075	-4.683675361	0.005066953	0.009895262	-6.659046409
Q8S	8	Q	S	0.06320078	0.230909752	-2.114598989	0.030065168	0.093717052	-3.415544615	0.074073418	0.144658108	-2.789280911
Q8T	8	Q	T	0.03123808	0.114131143	-3.131235578	0.018899404	0.058911908	-4.085296899	0.01664662	0.032509213	-4.943007568
Q8V	8	Q	V	0.06107433	0.223140578	-2.163975205	0.013447505	0.041917629	-4.576299073	0.018944647	0.036997034	-4.756446582
Q8W	8	Q	W	0.030711993	0.11220904	-3.155739189	0.035219399	0.109783462	-3.187267359	0.002641029	0.005157671	-7.599064508
Q8Y	8	Q	Y	0.020643566	0.07542313	-3.728849175	0.01686306	0.052564357	-4.249771312	0.011829171	0.023101209	-5.435887808
K9A	9	K	A	0.067617275	0.410677174	-1.283923332	0.049831331	0.193879521	-2.36676767	0.007921794	0.037459029	-4.738542695
K9C	9	K	C	0.019118274	0.11611587	-3.106362936	0.018914455	0.07359076	-3.764331565	0.006529091	0.03087349	-5.017487624
K9D	9	K	D	0.040517643	0.246086095	-2.022764956	0.004568237	0.017773708	-5.814111472	0.05870951	0.277614043	-1.848847545
K9E	9	K	E	0.018466767	0.112158905	-3.156383922	0.008337606	0.032439253	-4.946115594	0.066750318	0.315635846	-1.663667037
K9F	9	K	F	0.069945757	0.424819333	-1.235078673	0.008629775	0.033575998	-4.89642592	0.002904393	0.013733726	-6.186133104
K9G	9	K	G	0.03278616	0.199128515	-2.328228268	0.052020759	0.202397965	-2.304733312	0.009072229	0.042898983	-4.542912753
K9H	9	K	H	0.071311469	0.433114059	-1.207181092	0.046641777	0.181469876	-2.462198017	0.211449979	0.999863295	-0.000197238
K9I	9	K	I	0.041236354	0.250451225	-1.997398425	0.004142294	0.016116487	-5.955318854	0.016960797	0.080200897	-3.640237814
K9K	9	K	K	0.164648244	1	0	0.257022146	1	0	0.21147889	1	0
K9L	9	K	L	0.053785028	0.326666272	-1.61411059	0.121461677	0.472572807	-1.081391479	0.020416488	0.096541494	-3.372707041
K9M	9	K	M	NA	NA	NA	NA	NA	NA	NA	NA	NA
K9N	9	K	N	NA	NA	NA	NA	NA	NA	NA	NA	NA
K9P	9	K	P	0.066883394	0.406219908	-1.299667149	0.064440206	0.250718496	-1.995859664	0.053424825	0.252624861	-1.984931472
K9Q	9	K	Q	0.032026695	0.194515863	-2.362040281	0.065481957	0.254771655	-1.97272332	0.009494777	0.044897044	-4.477235737
K9R	9	K	R	0.029141111	0.17699011	-2.498259351	0.00415988	0.016184911	-5.949206796	0.054324158	0.256877452	-1.960847837
K9S	9	K	S	0.037438309	0.227383594	-2.136799929	0.073195576	0.284783149	-1.812064314	0.007354178	0.034774996	-4.845805847
K9T	9	K	T	0.043157547	0.26211969	-1.931702366	0.033419475	0.130025662	-2.943131708	0.114670621	0.542231998	-0.883017843
K9V	9	K	V	0.00620911	0.037711367	-4.728856735	0.053292959	0.207347731	-2.269875832	0.030822299	0.145746459	-2.778467263
K9W	9	K	W	0.03694226	0.224370809	-2.156043105	0.049481973	0.192520271	-2.376917735	0.006728208	0.031815034	-4.974147528
K9Y	9	K	Y	0.080034496	0.486093833	-1.040693263	0.011229784	0.043691891	-4.516490631	0.015810186	0.074760116	-3.741587377
T10A	10	T	A	0.018809677	0.128296276	-2.962448804	0.047670329	0.161110201	-2.633880254	0.008557204	0.025526684	-5.291850067
T10C	10	T	C	0.272655823	1.859719671	0.89508517	0.045445004	0.153589326	-2.702850142	0.00780436	0.023280901	-5.424709273
T10D	10	T	D	0.018477544	0.126030874	-2.988150894	0.038624802	0.130539261	-2.937444323	0.003355863	0.010010752	-6.642305843
T10E	10	T	E	0.029264937	0.199609084	-2.324750718	0.023868082	0.080666349	-3.631889221	0.004793505	0.01429933	-6.127908669
T10F	10	T	F	0.015157703	0.103387039	-3.273872763	0.012070069	0.040792906	-4.615537902	0.003281442	0.009788751	-6.674659531
T10G	10	T	G	0.032748026	0.223366396	-2.162515937	0.032183253	0.108768923	-3.200661677	0.059979132	0.178921566	-2.482600804
T10H	10	T	H	0.020065081	0.136859084	-2.869236896	0.024335411	0.082245771	-3.603914691	0.004900489	0.014618471	-6.096063764
T10I	10	T	I	0.050246229	0.342717421	-1.544908566	0.021134689	0.071428372	-3.807358953	0.053327971	0.159080728	-2.652169022
T10K	10	T	K	0.049590016	0.33824155	-1.563874203	0.007330618	0.024775104	-5.334965059	0.013279629	0.039613977	-4.657846641
T10L	10	T	L	0.039586456	0.270009681	-1.888916962	0.028046779	0.094788985	-3.399136773	0.024367485	0.072689758	-3.782104089
T10M	10	T	M	0.031976425	0.218103489	-2.196915246	0.071218767	0.240696256	-2.054714394	0.070089864	0.209082522	-2.25785563
T10N	10	T	N	0.025060699	0.170932989	-2.548497243	0.027237967	0.092055465	-3.441352817	0.003760843	0.011218834	-6.477933387
T10P	10	T	P	0.081263288	0.554277309	-0.851320147	0.095369177	0.322316783	-1.633448785	0.151309834	0.451366856	-1.14762761
T10Q	10	T	Q	0.034723122	0.236838049	-2.078027221	0.025478734	0.08610983	-3.537678249	0.103614837	0.309089646	-1.693902766
T10R	10	T	R	0.017668951	0.120515656	-3.052707519	0.012744769	0.043073172	-4.537066629	0.007265909	0.021674668	-5.527846293
T10S	10	T	S	0.033936893	0.231475369	-2.11106941	0.066374691	0.224324858	-2.156338599	0.103758367	0.309517807	-1.691905681
T10T	10	T	T	0.146611249	1	0	0.295886475	1	0	0.335225841	1	0
T10V	10	T	V	0.071291495	0.48626211	-1.040193915	0.061267476	0.207064133	-2.271850418	0.023586862	0.070361109	-3.82907796
T10W	10	T	W	0.001605501	0.010950738	-6.512828109	0.06054223	0.204613036	-2.289030029	0.011892597	0.035476372	-4.816997723
T10Y	10	T	Y	0.009260883	0.063166254	-3.984702179	0.003170677	0.010715858	-6.544108876	0.005847966	0.017444855	-5.841054557
G11A	11	G	A	0.104186889	0.378887185	-1.400159749	0.09623813	0.242932711	-2.041371333	0.099583899	0.23119281	-2.112831563
G11C	11	G	C	0.017738722	0.064508831	-3.954359521	0.01685846	0.0425556	-4.554507207	0.036162678	0.083954848	-3.574242545
G11D	11	G	D	0.069400883	0.252384015	-1.986307557	0.042599054	0.107532261	-3.217158541	0.125774442	0.291996466	-1.775977187
G11E	11	G	E	0.102986736	0.374522695	-1.416874952	0.016632515	0.041985249	-4.573973639	0.006369127	0.014786489	-6.079576616
G11F	11	G	F	0.004559922	0.016582662	-5.914180576	0.00313609	0.007916393	-6.980941057	0.00227278	0.005276459	-7.566214276
G11G	11	G	G	0.274981296	1	0	0.396151385	1	0	0.430739602	1	0
G11H	11	G	H	0.041110362	0.149502395	-2.741759503	0.023037137	0.058152357	-4.10401852	0.026160741	0.060734468	-4.04134068
G11I	11	G	I	0.004335755	0.015767455	-5.986906412	0.010328618	0.026072401	-5.261332734	0.003731487	0.008662977	-6.850921427
G11K	11	G	K	0.010714677	0.038965112	-4.681673239	0.007522065	0.018987854	-5.718779315	0.014922956	0.034644958	-4.851210773
G11L	11	G	L	0.023268226	0.084617486	-3.562900369	0.035008492	0.088371501	-3.500275009	0.00764039	0.017737839	-5.817025934
G11M	11	G	M	0.002821791	0.010261756	-6.606578549	0.010365475	0.02616544	-5.256193649	0.006474325	0.015030716	-6.055942408
G11N	11	G	N	0.03113574	0.113228573	-3.142690031	0.060808422	0.153497941	-2.703708792	0.003546267	0.008232973	-6.924370808
G11P	11	G	P	0.06254031	0.227434776	-2.136475226	0.048243038	0.121779299	-3.037659187	0.045620182	0.105911279	-3.239071859
G11Q	11	G	Q	0.033942684	0.123436337	-3.018160934	0.071781831	0.181197982	-2.46436121	0.057733866	0.134034264	-2.899326242
G11R	11	G	R	0.012457064	0.045301496	-4.464297495	0.017618094	0.044473135	-4.490922084	0.013567911	0.031499103	-4.988545436
G11S	11	G	S	0.097785821	0.35560899	-1.491636299	0.050313123	0.127004788	-2.97704521	0.031608797	0.073382613	-3.768417918
G11T	11	G	T	0.035144335	0.127806273	-2.967969447	0.026575225	0.067083508	-3.89789805	0.039864616	0.092549224	-3.4336353
G11V	11	G	V	0.022107875	0.080397741	-3.636701222	0.000806085	0.002034789	-8.940904731	0.005093531	0.011825081	-6.402006147
G11W	11	G	W	NA	NA	NA	NA	NA	NA	NA	NA	NA
G11Y	11	G	Y	0.009620679	0.034986668	-4.837050923	0.003610915	0.009114987	-6.777543701	0.002076957	0.004821839	-7.696200785
A12A	12	A	A	0.139162824	1	0	0.262528354	1	0	0.220800357	1	0
A12C	12	A	C	0.01252203	0.089981141	-3.474233525	0.003101571	0.011814232	-6.403330391	0.000864	0.003913039	-7.997494813
A12D	12	A	D	0.128057145	0.920196515	-0.119986102	0.10740839	0.409130626	-1.289366559	0.012583146	0.056988792	-4.133177979
A12E	12	A	E	0.085132165	0.611745024	-0.708997634	0.07152178	0.272434498	-1.876018696	0.002671717	0.012100147	-6.368831643
A12F	12	A	F	0.021003754	0.150929348	-2.728054735	0.008870898	0.033790247	-4.887249274	0.045826861	0.207548855	-2.268477122
A12G	12	A	G	0.027650898	0.198694571	-2.33137564	0.025611914	0.097558659	-3.357586258	0.005650171	0.025589499	-5.288304284
A12H	12	A	H	0.027150007	0.195095256	-2.357749399	0.049812863	0.189742793	-2.397883008	0.008386184	0.037980843	-4.71858428
A12I	12	A	I	0.039243933	0.282000119	-1.826232324	0.072632656	0.276665949	-1.853783002	0.192472256	0.871702648	-0.198092002
A12K	12	A	K	0.028057382	0.201615499	-2.310321547	0.009635926	0.036704325	-4.76790612	0.004303628	0.019491036	-5.681045425
A12L	12	A	L	0.023861846	0.171467102	-2.543996289	0.045239064	0.17232068	-2.53683225	0.013207831	0.059817981	-4.063276983
A12M	12	A	M	0.23412431	1.682376831	0.750500887	0.030556534	0.116393272	-3.102920429	0.080178091	0.363124825	-1.461462531
A12N	12	A	N	0.016763001	0.120456026	-3.053421523	0.048726198	0.185603565	-2.429703671	0.003052673	0.013825491	-6.176525478
A12P	12	A	P	0.039815474	0.286107118	-1.805372704	0.047554456	0.181140266	-2.46482081	0.018104323	0.081994082	-3.608336398
A12Q	12	A	Q	0.059027818	0.424163702	-1.237306928	0.058375913	0.222360411	-2.16902814	0.089843699	0.406900151	-1.297253278
A12R	12	A	R	0.016985066	0.122051749	-3.034435123	0.012221249	0.046552111	-4.425009591	0.002223352	0.010069512	-6.633862381
A12S	12	A	S	0.043361723	0.311589844	-1.682279882	0.044664608	0.170132512	-2.555269235	0.190306942	0.861895989	-0.214414315
A12T	12	A	T	0.03428358	0.246355884	-2.021184165	0.06109426	0.232714902	-2.1033645	0.03273248	0.148244688	-2.753947687
A12V	12	A	V	0.01411324	0.101415304	-3.301652724	0.026473117	0.100839076	-3.309873297	0.049503794	0.224201601	-2.157131513
A12W	12	A	W	0.003887908	0.027937836	-5.1616359	0.005988489	0.022810828	-5.45413737	0.022564724	0.102195144	-3.290601443
A12Y	12	A	Y	0.005795896	0.041648308	-4.585598295	0.00798176	0.030403419	-5.039622625	0.004723772	0.021393862	-5.546659283
H13A	13	H	A	0.057975022	0.308093011	-1.698562138	0.027675914	0.155275526	-2.687097638	0.017969664	0.050345115	-4.312004404
H13C	13	H	C	0.032740311	0.173989773	-2.522925585	0.009765752	0.054790682	-4.189925621	0.046243673	0.129559631	-2.948311827
H13D	13	H	D	0.024011502	0.127602814	-2.970267946	0.114587676	0.642893376	-0.63734861	0.032307421	0.090514817	-3.465702208
H13E	13	H	E	0.060269442	0.320286105	-1.642566883	0.042481627	0.238342876	-2.068889591	0.011730598	0.032865295	-4.927291241
H13F	13	H	F	0.006712716	0.035672963	-4.809025153	0.055618231	0.312045703	-1.68017075	0.00925777	0.025937242	-5.268831131
H13G	13	H	G	0.028326593	0.150534232	-2.731836499	0.005847967	0.032809978	-4.929721547	0.025694656	0.071988014	-3.796099469
H13H	13	H	H	0.188173765	1	0	0.178237451	1	0	0.356929642	1	0
H13I	13	H	I	0.013555188	0.07203548	-3.795148524	0.045476852	0.255147568	-1.970596207	0.001632322	0.004573233	-7.772569901
H13K	13	H	K	0.024519975	0.130304963	-2.940036066	0.071259188	0.399799187	-1.322652557	0.00263987	0.007396051	-7.079029183
H13L	13	H	L	0.072623485	0.385938414	-1.373557447	0.049200239	0.276037607	-1.857063265	0.051956871	0.145566143	-2.780253259
H13M	13	H	M	0.10924824	0.580571045	-0.784455474	0.211293224	1.185459192	0.245446	0.119532889	0.33489202	-1.578232096
H13N	13	H	N	0.03987177	0.211888039	-2.238625942	0.025972967	0.145721152	-2.778717785	0.044574905	0.124884291	-3.001336082
H13P	13	H	P	0.04775069	0.253758486	-1.978472027	0.019166132	0.107531453	-3.217169378	0.058635982	0.164278825	-2.605781557
H13Q	13	H	Q	NA	NA	NA	NA	NA	NA	NA	NA	NA
H13R	13	H	R	0.046499488	0.247109304	-2.016778762	0.006672564	0.037436373	-4.739415532	0.057145714	0.160103582	-2.642922511
H13S	13	H	S	0.05709485	0.303415566	-1.720632994	0.029990252	0.168260102	-2.571234974	0.010914413	0.030578611	-5.031333308
H13T	13	H	T	0.053311789	0.283311486	-1.819539004	0.034889909	0.195749594	-2.352918777	0.025300483	0.070883669	-3.818402902
H13V	13	H	V	0.048524281	0.257869532	-1.95528677	0.019326345	0.108430325	-3.2051598	0.005578073	0.015627935	-5.999729048
H13W	13	H	W	0.032265918	0.171468738	-2.543982526	0.002350498	0.013187453	-6.244690184	0.039743699	0.111348834	-3.166841642
H13Y	13	H	Y	0.017403343	0.09248549	-3.434629152	0.002632132	0.014767557	-6.08142502	0.00826371	0.02315221	-5.432706293
E14A	14	E	A	0.025385953	0.105989612	-3.238005227	0.177938661	0.568615535	-0.814474581	0.013441925	0.022902798	-5.448332355
E14C	14	E	C	0.074781297	0.312221511	-1.679358158	0.025954221	0.082938542	-3.59181351	0.010437513	0.017783781	-5.813294108
E14D	14	E	D	NA	NA	NA	NA	NA	NA	NA	NA	NA
E14E	14	E	E	0.239513596	1	0	0.312933168	1	0	0.586911926	1	0
E14F	14	E	F	0.006943831	0.028991384	-5.108231983	0.017249632	0.055122414	-4.181217117	0.005010765	0.008537507	-6.871969415
E14G	14	E	G	0.015583478	0.06506302	-3.942018411	0.083635662	0.267263655	-1.903664438	0.024103216	0.041067858	-4.605846474
E14H	14	E	H	0.038405943	0.160349739	-2.640706088	0.004113071	0.013143608	-6.249494814	0.027153103	0.046264357	-4.433955042
E14I	14	E	I	0.002076859	0.008671155	-6.849560166	0.004211468	0.013458043	-6.215387605	0.007629976	0.013000207	-6.265321602
E14K	14	E	K	0.006969775	0.029099703	-5.102851764	0.004103245	0.013112209	-6.252945435	0.013542988	0.023074992	-5.437526066
E14L	14	E	L	0.020426514	0.085283318	-3.551592614	0.026580419	0.084939602	-3.557418835	0.005040365	0.008587941	-6.863472067
E14M	14	E	M	0.08336061	0.348041245	-1.522669813	0.006632662	0.021195139	-5.560122742	0.018009624	0.030685395	-5.026304039
E14N	14	E	N	0.106995697	0.446720767	-1.162554773	0.082723268	0.264348034	-1.919489496	0.011619347	0.019797429	-5.658543094
E14P	14	E	P	0.083634885	0.349186376	-1.517930822	0.075033262	0.239774079	-2.060252393	0.04979279	0.084838607	-3.559135254
E14Q	14	E	Q	0.071538644	0.298683019	-1.743312875	0.021737134	0.069462546	-3.847620906	0.004573137	0.007791863	-7.003816017
E14R	14	E	R	0.022574496	0.094251416	-3.407341902	0.011773242	0.037622224	-4.732271036	0.003307133	0.005634803	-7.471419132
E14S	14	E	S	0.079222978	0.330766098	-1.596116724	0.032584935	0.104127457	-3.263577562	0.020943289	0.035683871	-4.808584073
E14T	14	E	T	0.03338534	0.139388079	-2.842820913	0.036932534	0.118020516	-3.082890429	0.113306344	0.193055106	-2.37291538
E14V	14	E	V	0.009419796	0.039328859	-4.668267875	0.019552071	0.062480022	-4.000461225	0.013120981	0.022355962	-5.483196534
E14W	14	E	W	0.014138196	0.059028782	-4.082437604	0.002783413	0.008894592	-6.812855804	0.00386652	0.006587905	-7.24596444
E14Y	14	E	Y	0.012222826	0.051031866	-4.292457807	0.008178943	0.02613639	-5.257796281	0.015574218	0.026535869	-5.235912407
T15A	15	T	A	0.121410968	0.949416952	-0.074886285	0.133984568	0.873588547	-0.194974153	0.112194181	0.485460081	-1.042575427
T15C	15	T	C	0.068146773	0.532898325	-0.908067797	0.084066227	0.548117547	-0.867442773	0.010870872	0.04703786	-4.41003375
T15D	15	T	D	0.025515942	0.199531132	-2.325314232	0.157421919	1.026401679	0.037595435	0.004432761	0.019180393	-5.704223939
T15E	15	T	E	0.011827236	0.092487345	-3.434600216	0.047192258	0.307696751	-1.700418882	0.001056302	0.004570579	-7.773407334
T15F	15	T	F	0.003248789	0.025405077	-5.298739365	0.008629673	0.056266059	-4.151591281	0.001422561	0.006155367	-7.343939399
T15G	15	T	G	0.038476156	0.300878207	-1.732748481	0.046774429	0.304972477	-1.713249046	0.022540517	0.097531987	-3.357980746
T15H	15	T	H	0.069185162	0.541018379	-0.886250491	0.0803096	0.523624081	-0.933396648	0.011695863	0.050607567	-4.304503068
T15I	15	T	I	0.003150495	0.024636438	-5.343062531	0.000963903	0.006284715	-7.313936906	0.005239447	0.022670896	-5.463014783
T15K	15	T	K	0.012946629	0.101240842	-3.304136685	0.01405883	0.091664535	-3.447492524	0.026882286	0.116318661	-3.103845532
T15L	15	T	L	0.015179706	0.1187032	-3.07456927	0.02077785	0.135473006	-2.883922687	0.01404814	0.060785781	-4.040122293
T15M	15	T	M	0.010481583	0.081964526	-3.608856538	0.003993767	0.026039637	-5.263146871	0.002484441	0.010750083	-6.539508452
T15N	15	T	N	0.088540803	0.692376812	-0.530370686	0.002202833	0.014362624	-6.121536871	0.049983498	0.216276753	-2.209049492
T15P	15	T	P	0.074418783	0.58194457	-0.781046351	0.043129235	0.281205559	-1.830302982	0.10631347	0.460014461	-1.12024888
T15Q	15	T	Q	0.128896798	1.007955105	0.011431381	0.037443732	0.244135696	-2.034244845	0.229404704	0.992625689	-0.010678302
T15R	15	T	R	0.04891971	0.382545352	-1.386297301	0.017417156	0.113561051	-3.138459989	0.021016579	0.090937964	-3.458973491
T15S	15	T	S	0.0769158	0.601470901	-0.733433153	0.066423157	0.433083524	-1.207282807	0.025477527	0.11024032	-3.181276112
T15T	15	T	T	0.127879503	1	0	0.153372625	1	0	0.231108973	1	0
T15V	15	T	V	0.000765531	0.00598635	-7.384107769	0.001950177	0.012715287	-6.297292194	0.001346387	0.005825769	-7.423335905
T15W	15	T	W	0.024118325	0.188601964	-2.406583399	0.041974537	0.273676854	-1.869454672	0.10030774	0.434027889	-1.204140348
T15Y	15	T	Y	0.049975308	0.390799982	-1.355497694	0.037913521	0.247198751	-2.016256638	0.02217375	0.095945	-3.38164857
R16A	16	R	A	0.047656453	0.573027949	-0.803322588	0.062494348	1.974924138	0.981797236	0.00359253	0.121541817	-3.04047533
R16C	16	R	C	0.024039518	0.289054569	-1.79058622	0.031457948	0.994122881	-0.008503904	0.001041719	0.035243243	-4.826509507
R16D	16	R	D	0.060970219	0.733114552	-0.447889452	0.572330224	18.08657593	4.176847404	0.202755408	6.85958459	2.778121211
R16E	16	R	E	0.03485945	0.419154962	-1.254444388	0.007356755	0.232485557	-2.104787003	0.007483309	0.253173971	-1.981799009
R16F	16	R	F	0.016545326	0.198943341	-2.329570482	0.027911042	0.882034796	-0.181092523	0.000485759	0.016434109	-5.927162931
R16G	16	R	G	0.024959717	0.300119176	-1.736392594	0.020099351	0.635172547	-0.654779535	0.229514243	7.764884699	2.956964502
R16H	16	R	H	0.016409959	0.197315671	-2.341422557	0.014968786	0.473038248	-1.079971256	0.002063302	0.069805274	-3.840520144
R16I	16	R	I	0.004033226	0.048496087	-4.365987853	0.001428321	0.045137298	-4.469536128	0.000792914	0.02682574	-5.220238244
R16K	16	R	K	0.0342488	0.411812428	-1.279940725	0.003237101	0.102297713	-3.289154203	0.000611099	0.02067459	-5.595997481
R16L	16	R	L	0.054203846	0.651754721	-0.617598967	0.038347293	1.211837509	0.277196265	0.080854846	2.735466664	1.451786974
R16M	16	R	M	NA	NA	NA	NA	NA	NA	NA	NA	NA
R16N	16	R	N	0.059884645	0.720061456	-0.473808052	0.008530196	0.269568216	-1.891277694	0.327691898	11.08641353	3.470720822
R16P	16	R	P	0.082271026	0.989238479	-0.015609737	0.037184317	1.175085546	0.232765788	0.00582899	0.197205359	-2.342229336
R16Q	16	R	Q	0.057162744	0.687332939	-0.540918995	0.008770294	0.277155712	-1.851231354	0.005079735	0.171856668	-2.540722264
R16R	16	R	R	0.083166019	1	0	0.031643923	1	0	0.029557972	1	0
R16S	16	R	S	0.063765828	0.766729355	-0.38321068	0.034321888	1.084628086	0.117200434	0.008033546	0.271789495	-1.879438398
R16T	16	R	T	0.191496192	2.302577357	1.203249626	0.011488814	0.363065398	-1.461698656	0.002515803	0.085114197	-3.554456389
R16V	16	R	V	0.013687689	0.164582709	-2.603115322	0.000762381	0.024092499	-5.375272157	0.001699699	0.057503912	-4.120196083
R16W	16	R	W	NA	NA	NA	NA	NA	NA	NA	NA	NA
R16Y	16	R	Y	0.03205767	0.385465964	-1.375324616	0.000630403	0.01992176	-5.649511061	0.000241765	0.008179354	-6.933797299
L17A	17	L	A	0.034369924	0.420345506	-1.250352446	0.02721584	0.423206692	-1.240565656	0.011968481	0.081506918	-3.616933682
L17C	17	L	C	0.004460486	0.054551912	-4.196226419	0.078895938	1.226832948	0.294938818	0.029966804	0.204077852	-2.292808476
L17D	17	L	D	0.00648624	0.07932697	-3.656044742	0.093327782	1.451248323	0.5372944	0.006930138	0.047195147	-4.405217685
L17E	17	L	E	0.136183992	1.665535508	0.735986111	0.052978859	0.823822001	-0.27959544	0.16460837	1.121004525	0.164792102
L17F	17	L	F	0.023387784	0.286033509	-1.805743927	0.038537789	0.599263156	-0.738738418	0.006914009	0.047085303	-4.408579378
L17G	17	L	G	0.012180747	0.148971005	-2.746896534	0.013600902	0.211494221	-2.241309849	0.138124022	0.940642648	-0.08828135
L17H	17	L	H	0.04429334	0.541709263	-0.884409334	0.041548573	0.646080901	-0.630213267	0.015444461	0.105178798	-3.249084182
L17I	17	L	I	0.004529996	0.055402031	-4.173917332	0.009152317	0.142318662	-2.812803239	0.004888466	0.033291094	-4.908719916
L17K	17	L	K	0.061417314	0.751136131	-0.412853698	0.066819272	1.039040614	0.055252047	0.004261612	0.029022137	-5.106702446
L17L	17	L	L	0.081765889	1	0	0.064308624	1	0	0.146840059	1	0
L17M	17	L	M	NA	NA	NA	NA	NA	NA	NA	NA	NA
L17N	17	L	N	0.072117212	0.881996298	-0.181155495	0.024724389	0.384464599	-1.379077331	0.126386184	0.860706442	-0.216406828
L17P	17	L	P	0.069945831	0.855440229	-0.22526104	0.021438908	0.333375328	-1.584780757	0.061690251	0.420118673	-1.251131184
L17Q	17	L	Q	0.022362266	0.273491381	-1.870432726	0.131125239	2.038999315	1.027861291	0.082284078	0.560365332	-0.835560391
L17R	17	L	R	0.039010761	0.477103128	-1.067626951	0.007487692	0.116433714	-3.102419236	0.017172504	0.116947	-3.096073244
L17S	17	L	S	0.046505751	0.56876714	-0.814089979	0.034075321	0.529871713	-0.916284983	0.020071017	0.136686247	-2.871060006
L17T	17	L	T	0.127156321	1.55512675	0.637032171	0.04725338	0.73479073	-0.444594669	0.05284733	0.35989723	-1.474343098
L17V	17	L	V	0.060361861	0.738227907	-0.437861819	0.154494197	2.402386935	1.264468534	0.025384549	0.172872098	-2.532223062
L17W	17	L	W	0.037849259	0.462897912	-1.11123404	0.015326044	0.238320205	-2.069026823	0.003284865	0.022370362	-5.482267601
L17Y	17	L	Y	0.067116601	0.820838643	-0.284829444	0.024852953	0.386463761	-1.371594957	0.040934201	0.278767259	-1.842866966
N18A	18	N	A	0.053479946	0.377592853	-1.405096637	0.032366516	0.263922937	-1.921811356	0.015643886	0.132433852	-2.916656153
N18C	18	N	C	0.024292754	0.171517945	-2.543568573	0.008333571	0.06795358	-3.879306636	0.056592346	0.479084446	-1.06164812
N18D	18	N	D	0.06130604	0.432848649	-1.208065438	0.314397429	2.563658465	1.358204077	0.257105536	2.176535735	1.122033707
N18E	18	N	E	0.098031093	0.692144305	-0.530855238	0.018153071	0.148023713	-2.756099781	0.02988362	0.25298081	-1.982900143
N18F	18	N	F	0.032159364	0.227059802	-2.138855776	0.009862652	0.080422006	-3.636265869	0.016908382	0.143138485	-2.804516475
N18G	18	N	G	0.154517836	1.090966517	0.125606824	0.055850197	0.455413493	-1.134751057	0.044912078	0.38020474	-1.395151577
N18H	18	N	H	0.034464538	0.243335383	-2.03898198	0.009214611	0.075137748	-3.734318305	0.086455841	0.731894885	-0.450291632
N18I	18	N	I	0.016434616	0.116035898	-3.107356897	0.00562166	0.045840123	-4.447245267	0.011494656	0.097308402	-3.361291815
N18K	18	N	K	NA	NA	NA	NA	NA	NA	NA	NA	NA
N18L	18	N	L	0.055056341	0.38872292	-1.363185919	0.031003029	0.252804798	-1.983904252	0.159320747	1.348735253	0.431607186
N18M	18	N	M	0.057946942	0.409131883	-1.289362125	0.127174529	1.037006121	0.052424409	0.026995927	0.228534946	-2.129513307
N18N	18	N	N	0.141633894	1	0	0.122636238	1	0	0.118126035	1	0
N18P	18	N	P	0.103998147	0.734274427	-0.44560874	0.097708002	0.796730261	-0.327836723	0.045504842	0.385222799	-1.376235007
N18Q	18	N	Q	0.019305701	0.136307069	-2.875067715	0.057710914	0.470586139	-1.087469269	0.001501177	0.012708267	-6.298088895
N18R	18	N	R	0.011941067	0.084309386	-3.568162934	0.007347747	0.059914972	-4.060939634	0.012659734	0.107171414	-3.222007957
N18S	18	N	S	0.050140919	0.354017798	-1.498106202	0.001655492	0.01349921	-6.210981222	0.017420524	0.147474046	-2.761467015
N18T	18	N	T	0.022947091	0.162016948	-2.625783361	0.016448483	0.134124168	-2.898358877	0.01975289	0.167218772	-2.580191282
N18V	18	N	V	0.005061307	0.035735143	-4.806512626	0.001892308	0.015430249	-6.018094868	0.008738902	0.073979474	-3.756731144
N18W	18	N	W	0.005623884	0.039707193	-4.6544558	0.030533515	0.248976282	-2.005919781	0.007232392	0.061226063	-4.029710263
N18Y	18	N	Y	0.0022657	0.015996879	-5.966065759	0.003609974	0.02943644	-5.086253003	0.006619206	0.056035112	-4.157525087
A19A	19	A	A	0.088912591	1	0	0.105305428	1	0	0.208250479	1	0
A19C	19	A	C	0.201463367	2.265858683	1.180057886	0.113244789	1.075393648	0.104864855	0.015613956	0.074976809	-3.737411767
A19D	19	A	D	0.042403341	0.476910414	-1.068209809	0.010292708	0.097741472	-3.354885356	0.026528086	0.127385472	-2.972727342
A19E	19	A	E	0.054378208	0.611591757	-0.709359134	0.019939102	0.189345437	-2.40090744	0.085823376	0.412116102	-1.27887726
A19F	19	A	F	0.021700059	0.244060586	-2.034688767	0.010031075	0.095256959	-3.392031704	0.006661571	0.031988264	-4.966313471
A19G	19	A	G	0.037708238	0.424104586	-1.23750801	0.03920938	0.372339595	-1.425309054	0.01679777	0.080661375	-3.631978182
A19H	19	A	H	0.054275918	0.610441299	-0.712075525	0.059780012	0.567682152	-0.816844711	0.0457164	0.219526025	-2.18753611
A19I	19	A	I	0.008002	0.089998498	-3.473955269	0.001171713	0.011126802	-6.489817175	0.013110979	0.06295774	-3.989472445
A19K	19	A	K	0.023280961	0.261840987	-1.933237151	0.009570747	0.090885597	-3.459804513	0.007582235	0.036409207	-4.779552884
A19L	19	A	L	0.039214862	0.441049594	-1.180987205	0.030676424	0.291309048	-1.779377583	0.029249709	0.14045446	-2.831825658
A19M	19	A	M	0.016512887	0.185720462	-2.428795323	0.055759327	0.529500975	-0.917294754	0.029289026	0.140643257	-2.829887705
A19N	19	A	N	0.037042889	0.416621411	-1.263191112	0.177525236	1.685812774	0.75344432	0.031172211	0.149686142	-2.739987436
A19P	19	A	P	0.080433941	0.904640616	-0.144583324	0.08254585	0.783870795	-0.35131222	0.08021312	0.385176161	-1.376409678
A19Q	19	A	Q	0.048917089	0.550170546	-0.862049191	0.097511031	0.925982945	-0.110942473	0.043825882	0.210447929	-2.248464782
A19R	19	A	R	0.028984751	0.325991523	-1.617093647	0.023636209	0.224453852	-2.155509239	0.044006393	0.211314726	-2.242534785
A19S	19	A	S	0.046476875	0.522725457	-0.935874675	0.070417331	0.668696119	-0.58057735	0.179301358	0.860988935	-0.215933398
A19T	19	A	T	0.054038894	0.607775492	-0.718389594	0.022153915	0.210377711	-2.248946231	0.068189717	0.327440864	-1.610693715
A19V	19	A	V	0.012356813	0.138977087	-2.847081047	0.028161389	0.267425807	-1.902789398	0.001796522	0.008626737	-6.856969298
A19W	19	A	W	0.027704593	0.311593588	-1.68226255	0.011456333	0.108791478	-3.200362548	0.02749804	0.132043106	-2.920919119
A19Y	19	A	Y	0.076191725	0.856928403	-0.222753423	0.031612002	0.30019347	-1.736035501	0.039373171	0.189066412	-2.403035005
S20A	20	S	A	0.042886665	0.425162045	-1.233915283	0.033040188	0.501467369	-0.995772267	0.027487152	0.229233619	-2.125109454
S20C	20	S	C	0.034818079	0.345173158	-1.534607815	0.00523449	0.079446455	-3.653873339	0.03007154	0.250786549	-1.995468124
S20D	20	S	D	0.022427767	0.222340331	-2.16915843	0.017923125	0.272028182	-1.878171973	0.010143344	0.084592086	-3.563333495
S20E	20	S	E	0.059154838	0.586438507	-0.769948256	0.031379532	0.476262762	-1.070170343	0.005363549	0.044730199	-4.482606998
S20F	20	S	F	0.01713543	0.169874116	-2.557462055	0.018212025	0.276412968	-1.855102795	0.005219008	0.043524778	-4.522019259
S20G	20	S	G	0.065583339	0.650168211	-0.621115075	0.148198456	2.249281669	1.169464336	0.256393013	2.138231659	1.096418165
S20H	20	S	H	0.036277912	0.359645388	-1.475352992	0.012989548	0.197148824	-2.34264299	0.012489786	0.104160619	-3.263118165
S20I	20	S	I	0.093276044	0.924703138	-0.112937811	0.004897038	0.074324778	-3.750012945	0.017504255	0.145979611	-2.776161211
S20K	20	S	K	0.013000656	0.12888355	-2.955859961	0.003949293	0.059940381	-4.060327943	0.061421108	0.512231423	-0.965132336
S20L	20	S	L	0.084242761	0.835150611	-0.259891699	0.054199373	0.822610844	-0.281718004	0.024909763	0.207739065	-2.26715556
S20M	20	S	M	0.004205263	0.04168937	-4.584176623	0.344077799	5.222239876	2.384668727	0.024875957	0.207457135	-2.269114822
S20N	20	S	N	0.048783969	0.483625663	-1.048037292	0.036739117	0.557607849	-0.842677225	0.038418618	0.320398377	-1.642061256
S20P	20	S	P	0.077641645	0.769709668	-0.377613727	0.049402788	0.749810678	-0.415401724	0.016465758	0.137318896	-2.864397931
S20Q	20	S	Q	0.033833165	0.335409099	-1.576006268	0.003870747	0.058748256	-4.089310171	0.014059973	0.117255454	-3.092273068
S20R	20	S	R	0.028328426	0.280837217	-1.832193958	0.011633996	0.176574949	-2.501647416	0.004146409	0.034579663	-4.853932369
S20S	20	S	S	0.10087134	1	0	0.065887015	1	0	0.119908903	1	0
S20T	20	S	T	0.023897332	0.236909041	-2.07759484	0.010714796	0.162623781	-2.620389848	0.256206033	2.136672312	1.095365668
S20V	20	S	V	0.101364928	1.004893241	0.007042238	0.065140639	0.988671879	-0.016436297	0.040708224	0.339492927	-1.558546578
S20W	20	S	W	0.102460948	1.015758774	0.022557826	0.070283594	1.066729053	0.093193782	0.003808519	0.03176177	-4.976564886
S20Y	20	S	Y	0.009809493	0.09724757	-3.362193992	0.012226441	0.185566783	-2.42998961	0.030399087	0.253518177	-1.979838902
G21A	21	G	A	0.053105197	0.43937005	-1.186491563	0.051267961	1.185132686	0.245048591	0.021524129	0.161592272	-2.62956989
G21C	21	G	C	0.021551475	0.178307838	-2.487557973	0.027532731	0.636458696	-0.651861204	0.050453455	0.378779021	-1.400571665
G21D	21	G	D	0.005043731	0.041729707	-4.582781402	0.085614574	1.979104078	0.984847483	0.054033629	0.405657155	-1.301667161
G21E	21	G	E	0.104119442	0.861440451	-0.215177025	0.38935444	9.000488138	3.170003248	0.211869206	1.590606841	0.669577281
G21F	21	G	F	0.037330375	0.308855818	-1.694994588	0.007538432	0.174261708	-2.520672503	0.004656331	0.034957379	-4.838259179
G21G	21	G	G	0.120866674	1	0	0.043259258	1	0	0.133200235	1	0
G21H	21	G	H	0.063244201	0.523255904	-0.934411409	0.024213966	0.559740676	-0.837169504	0.069716085	0.523393105	-0.934033176
G21I	21	G	I	0.036955011	0.305750212	-1.709574595	0.041760202	0.965347169	-0.050880221	0.048189477	0.361782224	-1.466806573
G21K	21	G	K	0.028723503	0.237646181	-2.073112877	0.029411801	0.679896105	-0.556613791	0.013124454	0.098531762	-3.34326734
G21L	21	G	L	0.019635536	0.162456161	-2.621877641	0.011077492	0.256072167	-1.965377644	0.002050225	0.015392054	-6.021670449
G21M	21	G	M	0.004885477	0.040420384	-4.628773148	0.029535231	0.682749366	-0.550572025	0.03528162	0.264876558	-1.916607925
G21N	21	G	N	0.019616013	0.16229464	-2.623312743	0.048571831	1.122807775	0.167110959	0.032456228	0.243664941	-2.037029407
G21P	21	G	P	0.090575421	0.749382921	-0.416224996	0.029049651	0.671524483	-0.574488096	0.178618078	1.340974192	0.423281472
G21Q	21	G	Q	0.074624598	0.617412524	-0.695693348	0.007925121	0.183200586	-2.44850398	0.016258564	0.122061076	-3.034324877
G21R	21	G	R	0.023209437	0.192025116	-2.380633076	0.01181702	0.273167432	-1.872142603	0.004094665	0.030740674	-5.023707386
G21S	21	G	S	0.069570612	0.575597969	-0.796866593	0.045683262	1.056034336	0.078656743	0.02511932	0.18858315	-2.406727322
G21T	21	G	T	0.118306998	0.97882232	-0.030881095	0.057179587	1.321788426	0.402491269	0.006529695	0.049021648	-4.350437217
G21V	21	G	V	0.097174446	0.80398048	-0.314767621	0.010488342	0.242453128	-2.044222226	0.018405016	0.138175549	-2.855425753
G21W	21	G	W	0.003354978	0.027757679	-5.170969233	0.025187144	0.582237081	-0.780321372	0.060990932	0.457889069	-1.126929969
G21Y	21	G	Y	0.008106874	0.067072865	-3.898126953	0.023531951	0.5439749	-0.878388011	0.013428658	0.100815569	-3.310209637
N22A	22	N	A	0.056322748	0.72363362	-0.466668659	0.169772161	2.588554484	1.372146684	0.04461633	0.868470264	-0.203451643
N22C	22	N	C	0.024148499	0.310259467	-1.688452864	0.004948882	0.075456728	-3.728206641	0.007253973	0.141200755	-2.824180293
N22D	22	N	D	0.052228982	0.671036982	-0.575535816	0.006789493	0.10352094	-3.272005474	0.064384801	1.253269506	0.325696689
N22E	22	N	E	0.071193196	0.914688848	-0.128647033	0.011758257	0.179280807	-2.479707047	0.004585754	0.089263078	-3.485792632
N22F	22	N	F	0.028897978	0.371280678	-1.429417857	0.054549612	0.831730264	-0.265812367	0.045456976	0.884833703	-0.176521757
N22G	22	N	G	0.128729682	1.653916551	0.725886444	0.039290192	0.599066439	-0.739212081	0.003204104	0.062368853	-4.003030462
N22H	22	N	H	0.055083769	0.70771523	-0.498759128	0.007246627	0.110490966	-3.177999673	0.033892752	0.659732606	-0.600046685
N22I	22	N	I	0.035163376	0.451778401	-1.146312797	0.013075758	0.199369036	-2.32648673	0.045475722	0.885198598	-0.175926928
N22K	22	N	K	NA	NA	NA	NA	NA	NA	NA	NA	NA
N22L	22	N	L	0.006943175	0.089205787	-3.486718879	0.006966891	0.106225757	-3.234794473	0.064753294	1.260442325	0.333930105
N22M	22	N	M	0.040603783	0.521676642	-0.938772257	0.05242363	0.799314924	-0.32316407	0.041692255	0.811552268	-0.301244081
N22N	22	N	N	0.077833239	1	0	0.065585701	1	0	0.051373468	1	0
N22P	22	N	P	0.063265281	0.812831147	-0.298972408	0.114906875	1.752011087	0.809011905	0.089826201	1.748494006	0.80611285
N22Q	22	N	Q	0.037882172	0.486709436	-1.038867349	0.013226443	0.201666559	-2.309956226	0.056768749	1.105020767	0.144073483
N22R	22	N	R	0.022034151	0.283094364	-1.820645067	0.063848295	0.973509375	-0.038733222	0.006693099	0.130283186	-2.940277191
N22S	22	N	S	0.029148502	0.374499404	-1.416964672	0.170062112	2.592975445	1.374608544	0.315094315	6.133405534	2.616688343
N22T	22	N	T	0.091736088	1.17862355	0.237102997	0.124098236	1.892153834	0.920029386	0.002759903	0.053722345	-4.218333919
N22V	22	N	V	0.02162734	0.277867658	-1.847530171	0.001988962	0.030326146	-5.043294007	0.011967281	0.232946717	-2.101928098
N22W	22	N	W	0.051479531	0.661408051	-0.596387488	0.016095936	0.245418379	-2.026684798	0.050251227	0.97815523	-0.03186466
N22Y	22	N	Y	0.058567604	0.752475483	-0.410283518	0.020313156	0.309719277	-1.690966915	0.008791671	0.17113252	-2.54681416
S23A	23	S	A	0.031765042	0.228722423	-2.128330287	0.02392072	0.17593226	-2.50690805	0.01304801	0.054080223	-4.208755082
S23C	23	S	C	0.042652068	0.307113854	-1.7031545	0.029940453	0.220206229	-2.183072813	0.05006274	0.207495556	-2.268847659
S23D	23	S	D	0.077038736	0.55471315	-0.850186169	0.01079057	0.079362551	-3.655397794	0.144235388	0.597813906	-0.742231639
S23E	23	S	E	0.134640345	0.969470345	-0.044731326	0.028465882	0.209361041	-2.25593509	0.164051687	0.679946728	-0.556506374
S23F	23	S	F	0.004888325	0.035198116	-4.82835798	0.028552558	0.209998531	-2.251548859	0.02724435	0.112919942	-3.146627804
S23G	23	S	G	0.081246975	0.585014346	-0.773456092	0.08516835	0.626396702	-0.674851478	0.032745388	0.135720149	-2.881293179
S23H	23	S	H	0.079885627	0.575212034	-0.797834236	0.069463775	0.510892597	-0.968908063	0.009025103	0.03740644	-4.740569521
S23I	23	S	I	0.038234708	0.275306895	-1.860887351	0.036390306	0.267643644	-1.901614705	0.012335833	0.051128454	-4.289729773
S23K	23	S	K	0.055835519	0.40204056	-1.314587041	0.127353832	0.93666274	-0.094398418	0.044916673	0.186166601	-2.425333825
S23L	23	S	L	0.00374255	0.026948026	-5.21367659	0.001758256	0.012931631	-6.272951945	0.04144931	0.171795386	-2.541236803
S23M	23	S	M	0.041536602	0.299082001	-1.741387006	0.057844933	0.425438265	-1.232978297	0.046965219	0.194657228	-2.360992175
S23N	23	S	N	0.014473261	0.104213917	-3.262380138	0.139712486	1.027558244	0.039220171	0.009750191	0.04041172	-4.629082446
S23P	23	S	P	0.072878483	0.524757482	-0.930277262	0.013388675	0.098471108	-3.3441557	0.013375616	0.055438054	-4.172979577
S23Q	23	S	Q	0.003716836	0.026762875	-5.223623095	0.049027151	0.360585189	-1.471587955	0.035060745	0.145316632	-2.782728259
S23R	23	S	R	0.015001408	0.108016805	-3.210672308	0.076766821	0.564605087	-0.824685967	0.003192963	0.013233906	-6.239617223
S23S	23	S	S	0.138880313	1	0	0.135965515	1	0	0.241271383	1	0
S23T	23	S	T	0.09491051	0.683397868	-0.549202349	0.015230452	0.11201702	-3.158210141	0.014377028	0.059588618	-4.068819406
S23V	23	S	V	0.015157648	0.109141802	-3.195724324	0.015027832	0.110526787	-3.17753203	0.028671661	0.118835729	-3.07295944
S23W	23	S	W	0.010880887	0.078347221	-3.673974084	0.009421348	0.069292185	-3.851163534	0.010419892	0.043187433	-4.533244623
S23Y	23	S	Y	0.042634156	0.306984876	-1.703760513	0.045810087	0.336924311	-1.569503564	0.057800821	0.23956766	-2.061494927
I24A	24	I	A	0.023145953	0.325049369	-1.621269241	0.039060632	0.515171223	-0.956876087	0.027643353	0.184941533	-2.434858841
I24C	24	I	C	0.007117405	0.099953018	-3.32260606	0.0174955	0.23074839	-2.115607515	0.008480336	0.056735749	-4.139598136
I24D	24	I	D	0.037747508	0.530105788	-0.915647802	0.019592045	0.25839975	-1.952323421	0.008692394	0.058154471	-4.103966068
I24E	24	I	E	0.077864927	1.093493333	0.128944425	0.235423545	3.105004408	1.634595316	0.177793137	1.189484322	0.250336257
I24F	24	I	F	0.133759768	1.87845054	0.90954313	0.049580994	0.653924415	-0.612804207	0.050220325	0.3359876	-1.573520105
I24G	24	I	G	0.049865619	0.700286045	-0.513983756	0.032963119	0.434751028	-1.201738655	0.013754501	0.092021346	-3.441887623
I24H	24	I	H	0.041577515	0.583892349	-0.776225687	0.009501519	0.125315668	-2.996361292	0.046534828	0.311330625	-1.683480596
I24I	24	I	I	0.071207501	1	0	0.07582068	1	0	0.14947077	1	0
I24K	24	I	K	0.003004696	0.042196342	-4.566738266	0.028790523	0.379718602	-1.396997418	0.005427311	0.036310183	-4.783482002
I24L	24	I	L	0.108371827	1.521915892	0.605888631	0.068553935	0.904158797	-0.14535192	0.024548627	0.164236975	-2.606149136
I24M	24	I	M	NA	NA	NA	NA	NA	NA	NA	NA	NA
I24N	24	I	N	0.008703054	0.122221031	-3.032435541	0.059596785	0.786022826	-0.347356887	0.010701173	0.071593753	-3.804022476
I24P	24	I	P	0.034750041	0.488010964	-1.035014533	0.042066844	0.554820187	-0.849907815	0.153495273	1.026925019	0.038330847
I24Q	24	I	Q	0.112133557	1.574743611	0.655116958	0.027469364	0.362293817	-1.464767912	0.007422539	0.049658797	-4.331806869
I24R	24	I	R	0.014324091	0.201159855	-2.31358568	0.041576249	0.548349721	-0.8668318	0.029484032	0.19725617	-2.341857666
I24S	24	I	S	0.065354958	0.917810022	-0.123732534	0.036116292	0.476338277	-1.06994161	0.129295926	0.865024821	-0.209186565
I24T	24	I	T	0.032828236	0.461022156	-1.117092009	0.003504795	0.046224785	-4.435189585	0.03897348	0.260743157	-1.939298704
I24V	24	I	V	0.059605754	0.837071276	-0.256577622	0.022146878	0.292095475	-1.775488085	0.002871211	0.019209183	-5.702060059
I24W	24	I	W	0.035837197	0.503278404	-0.990571404	0.084226349	1.110862482	0.151680231	0.029765689	0.199140537	-2.32814117
I24Y	24	I	Y	0.046761963	0.656699956	-0.606693737	0.061472644	0.810763549	-0.302646866	0.04047862	0.270812948	-1.884631378
I25A	25	I	A	0.050136582	0.614039832	-0.70359585	0.048069	0.497589871	-1.006970978	0.035901986	0.256912363	-1.960651781
I25C	25	I	C	0.032418938	0.397045803	-1.332622651	0.003748666	0.0388046	-4.687628495	0.017097339	0.122347488	-3.030943616
I25D	25	I	D	0.027574357	0.337712566	-1.566132233	0.032588158	0.337338768	-1.567729966	0.001897067	0.013575295	-6.202872678
I25E	25	I	E	0.105317397	1.289858101	0.367212361	0.04827012	0.499671787	-1.000947335	0.007046407	0.050423646	-4.309755755
I25F	25	I	F	0.001822874	0.022325365	-5.485172443	0.031721278	0.328365197	-1.60662687	0.026369318	0.188697184	-2.405855201
I25G	25	I	G	0.020185997	0.247224794	-2.016104656	0.046351749	0.479813624	-1.059453972	0.023461419	0.167888444	-2.574425165
I25H	25	I	H	0.050788833	0.62202817	-0.684948177	0.073278875	0.758551796	-0.3986804	0.082240326	0.588506612	-0.764869469
I25I	25	I	I	0.081650374	1	0	0.096603654	1	0	0.139744098	1	0
I25K	25	I	K	0.006789766	0.08315658	-3.588025758	0.065563201	0.678682417	-0.559191459	0.011104581	0.079463682	-3.653560547
I25L	25	I	L	0.058243737	0.713330919	-0.487356586	0.034429844	0.356403121	-1.488418123	0.11522403	0.824535933	-0.278345728
I25M	25	I	M	NA	NA	NA	NA	NA	NA	NA	NA	NA
I25N	25	I	N	0.10149744	1.24307378	0.313911927	0.025142145	0.260260806	-1.941970027	0.082863959	0.592969295	-0.753970693
I25P	25	I	P	0.079938258	0.979031129	-0.030573362	0.069893955	0.723512541	-0.466910071	0.099619396	0.712870146	-0.488288791
I25Q	25	I	Q	0.065552302	0.802841416	-0.316813053	0.044322902	0.458811856	-1.124025424	0.171506136	1.227287154	0.295472842
I25R	25	I	R	0.043095428	0.527804408	-0.921924695	0.043449331	0.449769021	-1.1527438	0.021091599	0.150930161	-2.728046965
I25S	25	I	S	0.037596577	0.460458107	-1.118858192	0.047812823	0.494938039	-1.01468017	0.059717172	0.427332335	-1.226569608
I25T	25	I	T	0.051158826	0.626559607	-0.674476331	0.103128833	1.067545884	0.09429808	0.010477813	0.074978574	-3.737377798
I25V	25	I	V	0.012780443	0.156526443	-2.675521694	0.072403624	0.749491567	-0.41601585	0.009991283	0.071496992	-3.805973653
I25W	25	I	W	0.075380715	0.923213336	-0.115264031	0.014556323	0.150680872	-2.730431806	0.009674801	0.069232271	-3.852411507
I25Y	25	I	Y	0.055782066	0.683181993	-0.549658145	0.040333427	0.417514512	-1.26010175	0.025427922	0.181960618	-2.458301852
H26A	26	H	A	0.083344121	0.448276807	-1.157538235	0.056149059	0.303896709	-1.718347044	0.003764776	0.031045895	-5.009453652
H26C	26	H	C	0.009832138	0.052883389	-4.241041552	0.028740715	0.15555396	-2.684512969	0.005533026	0.045627616	-4.453948925
H26D	26	H	D	0.08862656	0.476689069	-1.068879551	0.017259956	0.093416414	-3.420180127	0.005084656	0.041930177	-4.575867278
H26E	26	H	E	0.028234564	0.151863144	-2.719156315	0.040271574	0.217962667	-2.197847045	0.315905932	2.605090813	1.381333665
H26F	26	H	F	0.003787596	0.020372061	-5.617264238	0.005700813	0.030854625	-5.018369416	0.01122193	0.092540668	-3.433768675
H26G	26	H	G	0.040997497	0.220510179	-2.181082842	0.036605123	0.198118661	-2.335563316	0.017472406	0.144084677	-2.795011182
H26H	26	H	H	0.185921108	1	0	0.184763631	1	0	0.121264844	1	0
H26I	26	H	I	0.015031723	0.080850006	-3.628608312	0.002699079	0.01460828	-6.097069871	0.002048892	0.016896008	-5.88717378
H26K	26	H	K	0.03689973	0.198469826	-2.333008411	0.073027207	0.395246653	-1.33917485	0.00731245	0.060301486	-4.051662638
H26L	26	H	L	0.006075621	0.032678489	-4.935514897	0.003684689	0.019942721	-5.647993948	0.002058308	0.016973661	-5.880558434
H26M	26	H	M	0.042198138	0.226967979	-2.139439324	0.001710117	0.009255702	-6.755441932	0.023786242	0.196151175	-2.349962117
H26N	26	H	N	0.011668946	0.06276289	-3.993944413	0.020863998	0.112922647	-3.146593244	0.014756116	0.12168503	-3.038776402
H26P	26	H	P	0.037305759	0.200653706	-2.31722029	0.076616104	0.414670914	-1.269961239	0.000799674	0.006594445	-7.244533111
H26Q	26	H	Q	NA	NA	NA	NA	NA	NA	NA	NA	NA
H26R	26	H	R	0.074512713	0.400775975	-1.319132068	0.067471746	0.365178719	-1.453325402	0.170767307	1.408217756	0.493870438
H26S	26	H	S	0.064728611	0.348150954	-1.52221512	0.121310609	0.656571902	-0.606975083	0.064130344	0.528845309	-0.919082311
H26T	26	H	T	0.095229739	0.512205094	-0.965206493	0.119079805	0.644498078	-0.633752038	0.133082424	1.09745264	0.134158683
H26V	26	H	V	0.012770749	0.068689074	-3.863775548	0.00393085	0.021275022	-5.554695581	0.001399843	0.011543683	-6.436752588
H26W	26	H	W	0.077638833	0.417590204	-1.259840226	0.041350701	0.223803248	-2.159697118	0.009252676	0.076301389	-3.712146867
H26Y	26	H	Y	0.040016626	0.215234441	-2.216019142	0.049666597	0.268811545	-1.895332993	0.039941466	0.32937383	-1.602202165
Y27A	27	Y	A	0.039698928	0.168700544	-2.567463469	0.042303533	0.14968293	-2.740018392	0.019516087	0.048276747	-4.372527721
Y27C	27	Y	C	0.033474482	0.14224977	-2.813501776	0.072145931	0.255274527	-1.969878513	0.283744057	0.701894814	-0.510673251
Y27D	27	Y	D	0.050214115	0.213384819	-2.228470551	0.055523061	0.196457692	-2.347709436	0.027527756	0.068095133	-3.876304503
Y27E	27	Y	E	0.005881055	0.024991536	-5.322416602	0.002003033	0.007087347	-7.140538597	0.004473328	0.011065625	-6.497771189
Y27F	27	Y	F	0.01137394	0.048333545	-4.37083139	0.007649156	0.027065069	-5.207424136	0.058652046	0.145086976	-2.78501008
Y27G	27	Y	G	0.003042184	0.012927759	-6.273384022	0.005210718	0.018437126	-5.761242429	0.002141469	0.00529733	-7.560518963
Y27H	27	Y	H	0.026967245	0.114597275	-3.125355357	0.010104407	0.035752505	-4.805811853	0.025263377	0.062493762	-4.000144001
Y27I	27	Y	I	0.021087409	0.089610916	-3.480181701	0.011746848	0.041563965	-4.588522912	0.004725446	0.011689289	-6.418669013
Y27K	27	Y	K	0.016025591	0.068100727	-3.876185981	0.00473338	0.016748155	-5.899853977	0.005058	0.012511925	-6.320552472
Y27L	27	Y	L	0.07756601	0.329616662	-1.601138925	0.123644	0.437490556	-1.19267622	0.021648144	0.053550794	-4.222948211
Y27M	27	Y	M	0.01103171	0.046879239	-4.414907053	0.08901407	0.314959199	-1.666763147	0.028253334	0.069889986	-3.838770425
Y27N	27	Y	N	0.040460768	0.171937981	-2.540039822	0.019896746	0.070400817	-3.828264013	0.015329816	0.037921211	-4.720851163
Y27P	27	Y	P	0.019002188	0.080749775	-3.630397943	0.029009702	0.102645261	-3.284261067	0.002554214	0.006318333	-7.306240307
Y27Q	27	Y	Q	0.009027575	0.038362671	-4.704153035	0.018693052	0.066141777	-3.918294387	0.008171745	0.020214363	-5.62847545
Y27R	27	Y	R	0.013593911	0.057767308	-4.113602924	0.009822847	0.034756258	-4.84658342	0.003177756	0.007860784	-6.991111087
Y27S	27	Y	S	0.008098587	0.034414936	-4.860821369	0.001504291	0.005322645	-7.553640816	0.002280618	0.005641543	-7.469694501
Y27T	27	Y	T	0.044148193	0.18760769	-2.414209133	0.013335615	0.047185515	-4.405512155	0.008744596	0.021631419	-5.530727868
Y27V	27	Y	V	0.044681638	0.189874566	-2.39688143	0.0487809	0.172601849	-2.534480177	0.028755659	0.071132584	-3.813345626
Y27W	27	Y	W	0.289302595	1.229391009	0.297943839	0.152257753	0.538734827	-0.892352763	0.045728165	0.113117301	-3.144108496
Y27Y	27	Y	Y	0.235321873	1	0	0.282620957	1	0	0.404254386	1	0
T28A	28	T	A	0.036770707	0.207679422	-2.267569824	0.036325293	0.261753942	-1.933716828	0.009620943	0.076395607	-3.710366511
T28C	28	T	C	0.15529552	0.87710263	-0.189182432	0.155137599	1.117895419	0.160785228	0.026793318	0.212753773	-2.23274338
T28D	28	T	D	0.009404374	0.053115512	-4.234722931	0.002688339	0.019371721	-5.68990409	0.003531638	0.028043156	-5.156207462
T28E	28	T	E	0.065149376	0.367960959	-1.442375391	0.014948241	0.107714508	-3.214715522	0.002009818	0.015959068	-5.96947977
T28F	28	T	F	0.025416322	0.143550327	-2.800371482	0.075972278	0.547443443	-0.86921817	0.032097913	0.254875186	-1.972137171
T28G	28	T	G	0.039504299	0.223118635	-2.164117083	0.042728894	0.307897218	-1.699479264	0.011796936	0.093674196	-3.416204507
T28H	28	T	H	0.064215116	0.362684302	-1.46321379	0.044178689	0.318344192	-1.65134065	0.096132628	0.763346257	-0.389590476
T28I	28	T	I	0.005883992	0.033232541	-4.911259572	0.015085947	0.108706794	-3.201485981	0.004190564	0.033275398	-4.909400246
T28K	28	T	K	0.013798325	0.077932367	-3.68163355	0.037494509	0.270179118	-1.888011922	0.00425863	0.033815882	-4.886155196
T28L	28	T	L	0.070759533	0.399646894	-1.323202219	0.086179424	0.620994422	-0.687347786	0.009428904	0.074870714	-3.739454678
T28M	28	T	M	0.003672302	0.020741009	-5.591370135	0.004271307	0.030778321	-5.021941675	0.462600922	3.673307284	1.877079587
T28N	28	T	N	0.073201436	0.413438659	-1.2742548	0.094238906	0.679069688	-0.558368459	0.012321886	0.097842594	-3.35339353
T28P	28	T	P	0.057820291	0.326566593	-1.614550882	0.032950123	0.237433038	-2.074407401	0.025260242	0.200580295	-2.317748213
T28Q	28	T	Q	0.017458108	0.098602667	-3.342229522	0.052463581	0.378043733	-1.403374957	0.127864702	1.01531648	0.021929494
T28R	28	T	R	0.028229007	0.159436253	-2.648948381	0.010566364	0.076139439	-3.715212255	0.003632879	0.028847073	-5.115431239
T28S	28	T	S	0.052691086	0.297597061	-1.748567815	0.046881531	0.337820419	-1.565671565	0.014189552	0.112672892	-3.149787634
T28T	28	T	T	0.17705513	1	0	0.138776487	1	0	0.125935808	1	0
T28V	28	T	V	0.019205247	0.108470432	-3.204626259	0.025726725	0.185382452	-2.431423408	0.020882566	0.165819128	-2.592317654
T28W	28	T	W	0.055694562	0.314560567	-1.66859027	0.056330717	0.405909661	-1.300769418	0.002055933	0.016325248	-5.936751289
T28Y	28	T	Y	0.028775268	0.162521515	-2.621297379	0.027055048	0.194954117	-2.35879347	0.005394219	0.042833084	-4.545130629
N29A	29	N	A	0.075827396	0.347277844	-1.525837725	0.156561172	0.709973396	-0.49416313	0.370937465	1.409748094	0.495437392
N29C	29	N	C	0.005127903	0.023485011	-5.412115915	0.00360797	0.016361418	-5.933558415	0.011996388	0.045592282	-4.455066563
N29D	29	N	D	0.083083262	0.380508598	-1.393999043	0.006400321	0.029024166	-5.106601593	0.041721224	0.15856154	-2.656885218
N29E	29	N	E	0.049872093	0.228406536	-2.13032416	0.030479279	0.138217395	-2.854988897	0.05811819	0.220878222	-2.178676914
N29F	29	N	F	0.008981816	0.041135338	-4.603477885	0.01444755	0.065516729	-3.931992864	0.08407106	0.319512123	-1.646057422
N29G	29	N	G	0.074962004	0.343314479	-1.542397392	0.106272811	0.481925805	-1.053117041	0.026626605	0.101194432	-3.304798179
N29H	29	N	H	0.026978264	0.123556313	-3.016759372	0.05356249	0.242895108	-2.041594662	0.005984187	0.022742908	-5.458439483
N29I	29	N	I	0.009847369	0.045099441	-4.470746653	0.015054405	0.068268695	-3.872632015	0.004741155	0.018018762	-5.794356283
N29K	29	N	K	NA	NA	NA	NA	NA	NA	NA	NA	NA
N29L	29	N	L	0.01532594	0.070190455	-3.832581333	0.007511177	0.034061675	-4.875706823	0.001765853	0.006711125	-7.219229719
N29M	29	N	M	0.034246881	0.15684546	-2.672584325	0.044457732	0.201606864	-2.310383335	0.011257652	0.042784714	-4.546760746
N29N	29	N	N	0.218347924	1	0	0.220516956	1	0	0.263123225	1	0
N29P	29	N	P	0.026662589	0.122110569	-3.033740018	0.016386934	0.074311445	-3.750271765	0.005320335	0.020219936	-5.628077778
N29Q	29	N	Q	0.031931862	0.14624303	-2.773560228	0.055575397	0.252023239	-1.988371326	0.002024883	0.00769557	-7.021756067
N29R	29	N	R	0.042483705	0.19456885	-2.361647335	0.02437965	0.110556807	-3.177140245	0.013006057	0.04942953	-4.338483002
N29S	29	N	S	0.182621427	0.836378122	-0.25777277	0.145131201	0.65814078	-0.603531876	0.026082786	0.099127646	-3.334568716
N29T	29	N	T	0.012504436	0.057268401	-4.126116878	0.019948708	0.090463376	-3.466522356	0.013844845	0.052617345	-4.248317748
N29V	29	N	V	0.002797262	0.012811033	-6.286469403	0.003568746	0.016183546	-5.949328399	0.002869046	0.01090381	-6.519023828
N29W	29	N	W	0.035348278	0.161889689	-2.62691699	0.012380817	0.056144514	-4.154711132	0.003178915	0.012081467	-6.371060494
N29Y	29	N	Y	0.014308631	0.065531334	-3.931671279	0.016317855	0.073998188	-3.756366254	0.009113797	0.034636991	-4.8515426
I30A	30	I	A	0.002302357	0.006106987	-7.355323529	0.006888448	0.016510773	-5.920448492	0.008286769	0.011969284	-6.384519309
I30C	30	I	C	0.00572637	0.015189156	-6.04081446	0.046704139	0.111944154	-3.159148906	0.012356503	0.017847546	-5.808130446
I30D	30	I	D	0.02006508	0.053222485	-4.231820322	0.046852967	0.112300876	-3.154558917	0.018967116	0.027395816	-5.189900592
I30E	30	I	E	0.010187226	0.027021546	-5.209745974	0.010731506	0.025722118	-5.28084675	0.008439608	0.012190043	-6.358152972
I30F	30	I	F	0.070343981	0.186586916	-2.42208027	0.040049673	0.095994207	-3.380908843	0.016129494	0.023297198	-5.42369977
I30G	30	I	G	0.00292742	0.007764961	-7.00880555	0.009932792	0.023807697	-5.392428105	0.003662979	0.005290751	-7.56231167
I30H	30	I	H	0.018032505	0.047831093	-4.385907433	0.00984831	0.023605203	-5.404751281	0.006661554	0.009621849	-6.699470177
I30I	30	I	I	0.377003825	1	0	0.417209271	1	0	0.692336235	1	0
I30K	30	I	K	0.013188565	0.034982575	-4.837219708	0.01046001	0.025071374	-5.317815131	0.008320655	0.012018228	-6.378631977
I30L	30	I	L	0.128125334	0.33985155	-1.557023393	0.191548992	0.459119692	-1.123057782	0.04096115	0.059163667	-4.079144715
I30M	30	I	M	NA	NA	NA	NA	NA	NA	NA	NA	NA
I30N	30	I	N	0.041940492	0.111246862	-3.168163457	0.011265768	0.027002679	-5.210753649	0.013816692	0.019956622	-5.646988658
I30P	30	I	P	0.011964446	0.031735608	-4.97775372	0.006142515	0.014722863	-6.085797925	0.002082713	0.003008239	-8.376865274
I30Q	30	I	Q	0.030333304	0.080458875	-3.635604619	0.003730625	0.008941856	-6.805209929	0.005017853	0.007247711	-7.108258831
I30R	30	I	R	0.012926756	0.03428813	-4.866146978	0.01183773	0.028373601	-5.139306907	0.004617388	0.006669286	-7.228251946
I30S	30	I	S	0.010713353	0.028417095	-5.137097131	0.005415208	0.012979597	-6.26761059	0.011951188	0.017262116	-5.856246892
I30T	30	I	T	0.006458217	0.017130376	-5.86729933	0.006294177	0.015086379	-6.050609615	0.013211657	0.019082718	-5.711589524
I30V	30	I	V	0.111171422	0.294881417	-1.761793188	0.047088583	0.112865621	-3.14732199	0.021040438	0.03039049	-5.040236237
I30W	30	I	W	0.062063142	0.164622048	-2.602770521	0.043371652	0.103956588	-3.265946904	0.065659993	0.094838303	-3.398386348
I30Y	30	I	Y	0.021309831	0.056524177	-4.144988103	0.023594329	0.056552743	-4.144259188	0.008122671	0.011732263	-6.413374897
N31A	31	N	A	0.060376749	0.333741882	-1.583195349	0.023961098	0.089905822	-3.475441651	0.026308659	0.092276386	-3.437894692
N31C	31	N	C	0.040264372	0.222567588	-2.167684582	0.024042111	0.090209796	-3.47057209	0.035208153	0.123490943	-3.017522858
N31D	31	N	D	0.005026337	0.027783861	-5.169609099	0.016675127	0.062567708	-3.998437925	0.024684381	0.086579306	-3.529833957
N31E	31	N	E	0.017742981	0.098077092	-3.34993998	0.007646944	0.028692542	-5.123180389	0.004810741	0.016873448	-5.889101362
N31F	31	N	F	0.011300774	0.062466791	-4.000766772	0.013490806	0.050619635	-4.304159094	0.012353612	0.043329715	-4.528499437
N31G	31	N	G	0.024269765	0.134154904	-2.898028299	0.00788526	0.029586741	-5.078905394	0.012674681	0.044455847	-4.491483017
N31H	31	N	H	0.113886825	0.629527164	-0.667659464	0.039187739	0.147038583	-2.765733331	0.007450947	0.026133846	-5.257936756
N31I	31	N	I	0.029497356	0.163051227	-2.616602795	0.038931975	0.146078915	-2.77518014	0.009405047	0.032987759	-4.921925409
N31K	31	N	K	NA	NA	NA	NA	NA	NA	NA	NA	NA
N31L	31	N	L	0.061726304	0.341201761	-1.551303004	0.067154384	0.251973849	-1.988654085	0.069305197	0.243084723	-2.040468866
N31M	31	N	M	0.035637531	0.196992006	-2.343791008	0.028191273	0.105778108	-3.240887021	0.149289151	0.523624686	-0.933394982
N31N	31	N	N	0.180908516	1	0	0.266513307	1	0	0.285107169	1	0
N31P	31	N	P	0.020946436	0.115784688	-3.110483624	0.009633842	0.036147695	-4.789952548	0.013607199	0.047726612	-4.389062277
N31Q	31	N	Q	0.138985072	0.768261633	-0.380330387	0.252285481	0.946614949	-0.079150389	0.066770603	0.234194755	-2.094219332
N31R	31	N	R	0.053659967	0.296613828	-1.753342237	0.029742255	0.111597635	-3.163621646	0.026276208	0.092162565	-3.439675327
N31S	31	N	S	0.050659637	0.280029037	-1.836351663	0.030509329	0.114475819	-3.126885212	0.133916867	0.469707121	-1.090166629
N31T	31	N	T	0.039006331	0.215613568	-2.213480129	0.063268496	0.237393384	-2.074648366	0.039864102	0.139821466	-2.838342232
N31V	31	N	V	0.029298441	0.161951699	-2.626364495	0.02577719	0.096720087	-3.370040642	0.008178978	0.028687382	-5.123439862
N31W	31	N	W	0.004555027	0.025178622	-5.311656842	0.004090632	0.015348695	-6.025740158	0.011867476	0.041624614	-4.586419309
N31Y	31	N	Y	0.025974039	0.143575544	-2.800118064	0.005079405	0.019058729	-5.713404267	0.016534443	0.057993782	-4.107957954
Y32A	32	Y	A	0.003849684	0.017136136	-5.866814338	0.007075722	0.01535243	-6.025389147	0.014416301	0.020644363	-5.598108265
Y32C	32	Y	C	0.010140176	0.045137063	-4.469543657	0.007191607	0.015603869	-6.001952435	0.022817162	0.032674523	-4.935689994
Y32D	32	Y	D	0.008028832	0.035738818	-4.806364283	0.014019238	0.030418009	-5.03893048	0.013646241	0.019541625	-5.677305754
Y32E	32	Y	E	0.002956963	0.013162358	-6.247438186	0.024284539	0.052690974	-4.246300348	0.019783687	0.028330542	-5.141498001
Y32F	32	Y	F	0.397036851	1.767333936	0.821574661	0.041990281	0.091107712	-3.45628301	0.024278307	0.034766906	-4.8461415
Y32G	32	Y	G	0.000950388	0.004230472	-7.884965608	0.004685201	0.010165638	-6.620155445	0.002761163	0.003954027	-7.982461532
Y32H	32	Y	H	0.00684792	0.030482213	-5.035888549	0.009697204	0.021040347	-5.570697662	0.010876763	0.01557569	-6.004560086
Y32I	32	Y	I	0.008683416	0.038652572	-4.693291771	0.021600046	0.046866339	-4.41530408	0.010493725	0.015027174	-6.056282458
Y32K	32	Y	K	0.017546856	0.078106488	-3.6784138	0.01762817	0.038248429	-4.708455704	0.044988609	0.064424375	-3.95624956
Y32L	32	Y	L	0.003885778	0.017296801	-5.853350986	0.017412678	0.037780869	-4.726200299	0.008069826	0.011556113	-6.435199936
Y32M	32	Y	M	0.007988342	0.035558582	-4.813658396	0.01052007	0.022825746	-5.453194199	0.013831934	0.019807541	-5.657806421
Y32N	32	Y	N	0.003954494	0.017602678	-5.828061233	0.027805158	0.060329779	-4.050985894	0.032471366	0.046499491	-4.426641269
Y32P	32	Y	P	0.003956925	0.017613497	-5.82717483	0.003664888	0.007951829	-6.974497532	0.005998506	0.008589952	-6.863134186
Y32Q	32	Y	Q	0.005119126	0.022786815	-5.455656919	0.036659824	0.079542043	-3.652138576	0.035497914	0.050833555	-4.298075059
Y32R	32	Y	R	0.003041436	0.013538375	-6.20680164	0.010517916	0.022821072	-5.453489605	0.006219888	0.008906975	-6.810848781
Y32S	32	Y	S	0.009349796	0.041618837	-4.586619549	0.005580481	0.012108155	-6.36787716	0.003086201	0.004419487	-7.82190525
Y32T	32	Y	T	0.003455037	0.015379438	-6.022853379	0.012516912	0.027158362	-5.202459705	0.005501732	0.007878564	-6.987851674
Y32V	32	Y	V	0.006392825	0.028456441	-5.135100934	0.009553525	0.020728601	-5.592233406	0.012727749	0.018226331	-5.777832029
Y32W	32	Y	W	0.272162166	1.211478057	0.276768274	0.256710412	0.556993141	-0.844268533	0.014216344	0.020358022	-5.61825882
Y32Y	32	Y	Y	0.224652989	1	0	0.460886128	1	0	0.698316583	1	0
Y33A	33	Y	A	0.007216962	0.013805136	-6.178651119	0.004768319	0.008773775	-6.832586513	0.00660287	0.00989853	-6.658569971
Y33C	33	Y	C	0.043251419	0.082734501	-3.595367117	0.169978137	0.312762219	-1.676861845	0.045698464	0.068507733	-3.867589335
Y33D	33	Y	D	0.047866487	0.091562543	-3.449098658	0.024605699	0.045274841	-4.465146625	0.015949302	0.023910005	-5.386241731
Y33E	33	Y	E	0.022760793	0.043538522	-4.521563765	0.009039276	0.016632398	-5.909860023	0.011124469	0.016676975	-5.905998557
Y33F	33	Y	F	0.045497866	0.08703167	-3.522315712	0.027865797	0.051273467	-4.285643735	0.036942792	0.055381881	-4.174442137
Y33G	33	Y	G	0.004382407	0.008382992	-6.898319092	0.026051911	0.047935892	-4.382749918	0.01509356	0.022627141	-5.465801859
Y33H	33	Y	H	0.028249826	0.054038348	-4.209872631	0.018687397	0.03438508	-4.862073477	0.023254795	0.034861857	-4.842206777
Y33I	33	Y	I	0.010610973	0.02029745	-5.622557701	0.03035898	0.05586096	-4.162015828	0.022538344	0.033787806	-4.887353533
Y33K	33	Y	K	0.027039617	0.051723372	-4.273039863	0.009723133	0.017890704	-5.804646014	0.01401563	0.021011188	-5.572698433
Y33L	33	Y	L	0.017208081	0.032916886	-4.92502834	0.003848943	0.007082111	-7.141604791	0.005821347	0.00872693	-6.840310121
Y33M	33	Y	M	0.120844146	0.231159586	-2.113038904	0.008954386	0.016476199	-5.923472772	0.020660891	0.030973269	-5.012832534
Y33N	33	Y	N	0.030372606	0.058098959	-4.105343873	0.019282358	0.035479817	-4.816857625	0.028977415	0.043440782	-4.524806111
Y33P	33	Y	P	0.002355981	0.004506694	-7.793714729	0.002079409	0.003826143	-8.029893579	0.002284479	0.003424721	-8.189797912
Y33Q	33	Y	Q	0.010738852	0.020542068	-5.605274773	0.010880358	0.020020015	-5.642413131	0.012508235	0.018751414	-5.736856782
Y33R	33	Y	R	0.014953092	0.028603377	-5.127670728	0.015013984	0.027625946	-5.177832329	0.004014883	0.006018813	-7.376305246
Y33S	33	Y	S	0.003244902	0.006207087	-7.331867968	0.006780366	0.012475971	-6.324704039	0.005541877	0.008307969	-6.91128841
Y33T	33	Y	T	0.008179108	0.0156456	-5.998099197	0.021476482	0.039517036	-4.661381439	0.006719784	0.0100738	-6.633248173
Y33V	33	Y	V	0.010752474	0.020568125	-5.603445891	0.019120944	0.035182812	-4.828985405	0.012945087	0.01940631	-5.687330388
Y33W	33	Y	W	0.02170073	0.041510756	-4.590370986	0.028010113	0.051539012	-4.278191312	0.042250216	0.063338376	-3.980776312
Y33Y	33	Y	Y	0.522773676	1	0	0.543474008	1	0	0.66705556	1	0
K34A	34	K	A	0.002220047	0.004911025	-7.669760039	0.00310269	0.005919625	-7.400278499	0.003515557	0.005327065	-7.55244347
K34C	34	K	C	0.019748211	0.043685543	-4.516700258	0.012446991	0.023747627	-5.396072826	0.018485597	0.028010915	-5.157867096
K34D	34	K	D	0.012219884	0.02703193	-5.209191666	0.012541596	0.023928123	-5.385148932	0.005712511	0.008656072	-6.852071829
K34E	34	K	E	0.036654458	0.081084301	-3.624433567	0.035545062	0.067816458	-3.882220753	0.027593538	0.041812025	-4.579938265
K34F	34	K	F	0.011273008	0.02493732	-5.325549751	0.006285838	0.011992757	-6.381692833	0.013679979	0.020729042	-5.592202753
K34G	34	K	G	0.003296092	0.007291374	-7.099593675	0.005242939	0.010003008	-6.643422316	0.006572989	0.009959939	-6.649647366
K34H	34	K	H	0.012169521	0.02692052	-5.215149899	0.019733788	0.037650113	-4.731201985	0.007178697	0.010877759	-6.522474862
K34I	34	K	I	0.006028799	0.013336468	-6.228479577	0.006658773	0.012704279	-6.298541665	0.011938905	0.018090822	-5.788598255
K34K	34	K	K	0.452053692	1	0	0.524136215	1	0	0.659942641	1	0
K34L	34	K	L	0.00960485	0.021247145	-5.556587169	0.003385222	0.006458668	-7.27454764	0.034024523	0.051556789	-4.277693784
K34M	34	K	M	NA	NA	NA	NA	NA	NA	NA	NA	NA
K34N	34	K	N	NA	NA	NA	NA	NA	NA	NA	NA	NA
K34P	34	K	P	0.053272394	0.117845281	-3.085034108	0.030705115	0.058582319	-4.093390894	0.022622537	0.034279551	-4.866507978
K34Q	34	K	Q	0.017114751	0.037859997	-4.7231819	0.021057218	0.040175087	-4.637555051	0.016978862	0.025727785	-5.28052894
K34R	34	K	R	0.183044256	0.40491707	-1.304301633	0.134616655	0.256835249	-1.961084879	0.017553678	0.026598794	-5.232495372
K34S	34	K	S	0.013227991	0.029261991	-5.094828265	0.002026169	0.003865731	-8.01504315	0.005365326	0.008129989	-6.942530865
K34T	34	K	T	0.016045441	0.035494548	-4.816258763	0.042847933	0.081749614	-3.612644275	0.005580376	0.00845585	-6.885834461
K34V	34	K	V	0.004974672	0.011004604	-6.50574893	0.008336306	0.015904846	-5.974389799	0.004418808	0.006695746	-7.222539551
K34W	34	K	W	0.007155023	0.015827818	-5.981393822	0.009964085	0.019010487	-5.717060676	0.008939366	0.013545671	-6.206024376
K34Y	34	K	Y	0.030886342	0.068324499	-3.871453213	0.028284865	0.053964721	-4.211839617	0.032277419	0.04890943	-4.353743531
D35A	35	D	A	0.009484153	0.015035065	-6.05552505	0.020348444	0.030728189	-5.024293452	0.004655137	0.006589078	-7.245707646
D35C	35	D	C	0.01464557	0.023217372	-5.428651516	0.014855828	0.022433789	-5.478182869	0.01122895	0.015893933	-5.975380016
D35D	35	D	D	0.630802249	1	0	0.662207715	1	0	0.706492842	1	0
D35E	35	D	E	NA	NA	NA	NA	NA	NA	NA	NA	NA
D35F	35	D	F	0.012515778	0.019841049	-5.655367914	0.048774795	0.073654828	-3.763076094	0.012899545	0.018258564	-5.775282858
D35G	35	D	G	0.009825284	0.015575855	-6.004544853	0.015584314	0.023533876	-5.409117254	0.004840055	0.00685082	-7.189507603
D35H	35	D	H	0.008109796	0.012856321	-6.28137835	0.013132926	0.019832034	-5.656023555	0.010624101	0.015037804	-6.055262266
D35I	35	D	I	0.015883383	0.025179655	-5.311597648	0.039343063	0.059411967	-4.073102638	0.008165867	0.011558316	-6.43492503
D35K	35	D	K	0.030160006	0.047812142	-4.38647916	0.009395075	0.014187504	-6.139235379	0.038970025	0.05515983	-4.180238175
D35L	35	D	L	0.003378224	0.005355441	-7.544778811	0.005120789	0.007732904	-7.014773913	0.003567918	0.005050183	-7.629448745
D35M	35	D	M	0.041274075	0.065431084	-3.933880019	0.028369594	0.042840929	-4.544866426	0.05363153	0.075912347	-3.71952163
D35N	35	D	N	0.020464846	0.032442569	-4.945968113	0.009543677	0.014411909	-6.116594776	0.023472864	0.033224489	-4.911609166
D35P	35	D	P	0.009677576	0.015341696	-6.02639821	0.004068675	0.006144106	-7.346581126	0.002087758	0.002955102	-8.402576562
D35Q	35	D	Q	0.017907812	0.028388948	-5.138526807	0.007005783	0.010579434	-6.562593783	0.009524459	0.013481324	-6.21289403
D35R	35	D	R	0.040342494	0.063954264	-3.96681563	0.003885932	0.005868146	-7.412879463	0.003117434	0.004412549	-7.824172138
D35S	35	D	S	0.008088844	0.012823105	-6.285110531	0.003945257	0.005957734	-7.391020568	0.004747176	0.006719355	-7.217461449
D35T	35	D	T	0.012541151	0.019881271	-5.652446195	0.016959195	0.025610084	-5.287144191	0.008455497	0.01196827	-6.384641543
D35V	35	D	V	0.015024385	0.0238179	-5.391809942	0.007142141	0.010785349	-6.534783346	0.005068448	0.007174097	-7.122987094
D35W	35	D	W	0.016746099	0.026547303	-5.235290867	0.014993062	0.022641026	-5.464916853	0.012003778	0.016990657	-5.879114537
D35Y	35	D	Y	0.028895543	0.045807609	-4.448268941	0.029514581	0.044569974	-4.487784071	0.016855965	0.023858649	-5.389343822
A36A	36	A	A	0.403401244	1	0	0.46692106	1	0	0.325110743	1	0
A36C	36	A	C	0.018895128	0.046839539	-4.416129314	0.065978283	0.141305005	-2.823115526	0.008990711	0.027654304	-5.176352159
A36D	36	A	D	0.017693252	0.043860181	-4.510944424	0.091782876	0.196570436	-2.346881736	0.065534047	0.201574535	-2.310614701
A36E	36	A	E	0.073793277	0.182927738	-2.450654238	0.049554417	0.106130183	-3.236093085	0.008882722	0.027322141	-5.193785625
A36F	36	A	F	0.020600812	0.051067794	-4.291442458	0.013741678	0.029430409	-5.086548589	0.008500491	0.026146447	-5.257241268
A36G	36	A	G	0.012293903	0.030475621	-5.036200593	0.01094871	0.023448739	-5.414345872	0.002094765	0.006443234	-7.277999309
A36H	36	A	H	0.00577319	0.014311286	-6.126702913	0.008004851	0.017143908	-5.866160213	0.006808626	0.020942484	-5.577423643
A36I	36	A	I	0.04061724	0.100686948	-3.312051421	0.026182452	0.056074687	-4.156506527	0.036287235	0.111614999	-3.163397182
A36K	36	A	K	0.017050977	0.042268032	-4.564289245	0.01407531	0.030144947	-5.051940018	0.022418696	0.068957107	-3.858156931
A36L	36	A	L	0.040039899	0.099255766	-3.332705278	0.003158606	0.006764755	-7.207746646	0.004040835	0.012429102	-6.330134143
A36M	36	A	M	0.017798547	0.044121199	-4.502384185	0.059054296	0.126475973	-2.983064751	0.035231053	0.108366313	-3.206011744
A36N	36	A	N	0.027652972	0.068549546	-3.86670908	0.009064688	0.019413749	-5.686777475	0.004288644	0.013191333	-6.244265817
A36P	36	A	P	0.069022347	0.171100978	-2.54708009	0.013243041	0.028362484	-5.139872319	0.001834722	0.005643375	-7.469226092
A36Q	36	A	Q	0.033812297	0.083818029	-3.576595599	0.004964946	0.010633374	-6.555256702	0.005694331	0.017515049	-5.835261157
A36R	36	A	R	0.025630383	0.063535707	-3.976288587	0.026093862	0.055884954	-4.161396273	0.009712984	0.029875926	-5.064872783
A36S	36	A	S	0.046840549	0.116114042	-3.106385644	0.039257379	0.084077121	-3.572142918	0.312372742	0.960819503	-0.057662659
A36T	36	A	T	0.03678145	0.091178326	-3.455165264	0.037901343	0.081172913	-3.622857803	0.016770612	0.051584305	-4.276924011
A36V	36	A	V	0.052715542	0.130677687	-2.935915268	0.02240246	0.047979117	-4.381449578	0.012351829	0.037992682	-4.71813462
A36W	36	A	W	0.023360754	0.057909474	-4.110056806	0.019405131	0.041559767	-4.588668608	0.041040977	0.126236915	-2.985794241
A36Y	36	A	Y	0.016226236	0.040223565	-4.635815235	0.01826461	0.039117126	-4.676055803	0.072033236	0.221565227	-2.174196615
A37A	37	A	A	0.388718838	1	0	0.378326398	1	0	0.597355056	1	0
A37C	37	A	C	0.239713236	0.61667512	-0.697417453	0.278748132	0.73679271	-0.440669309	0.072232675	0.120920839	-3.047865201
A37D	37	A	D	0.01260672	0.032431461	-4.946462157	0.019691927	0.0520501	-4.263955266	0.009890317	0.016556848	-5.91642813
A37E	37	A	E	0.026406137	0.0679312	-3.87978184	0.022701205	0.060004284	-4.05879068	0.056163083	0.094019599	-3.410894662
A37F	37	A	F	0.008076892	0.020778235	-5.588783049	0.016608937	0.04390108	-4.509599763	0.013280449	0.022232086	-5.491212887
A37G	37	A	G	0.00412141	0.010602548	-6.559445165	0.019608796	0.051830366	-4.270058603	0.005748295	0.009622912	-6.699310747
A37H	37	A	H	0.002631703	0.006770197	-7.206586567	0.008687708	0.022963527	-5.444511947	0.007583455	0.012695054	-6.299589675
A37I	37	A	I	0.013506352	0.034745812	-4.847017108	0.087663839	0.231714836	-2.109577675	0.009662763	0.016175912	-5.950009161
A37K	37	A	K	0.016355191	0.042074603	-4.570906525	0.032746758	0.086556895	-3.530207438	0.028618085	0.047907998	-4.383589659
A37L	37	A	L	0.029146566	0.074981101	-3.737329178	0.007499116	0.019821816	-5.656767069	0.006911283	0.011569807	-6.433491405
A37M	37	A	M	0.058894725	0.151509831	-2.722516686	0.038055528	0.100589141	-3.31345352	0.052653579	0.088144526	-3.503985204
A37N	37	A	N	0.007792679	0.020047083	-5.640463895	0.006233124	0.016475521	-5.92353214	0.011163369	0.018687996	-5.741744331
A37P	37	A	P	0.008606156	0.022139796	-5.497214264	0.00379256	0.01002457	-6.640315818	0.006858063	0.011480715	-6.444643681
A37Q	37	A	Q	0.042076724	0.108244623	-3.207632728	0.011079428	0.029285368	-5.093676151	0.015280107	0.025579606	-5.288862142
A37R	37	A	R	0.009460125	0.024336678	-5.360723915	0.01327065	0.035077251	-4.833320505	0.00349938	0.005858124	-7.415345528
A37S	37	A	S	0.017586707	0.045242743	-4.46616978	0.008245721	0.021795256	-5.51984205	0.004150394	0.006947951	-7.1691967
A37T	37	A	T	0.024436955	0.062865374	-3.991590586	0.003167898	0.008373451	-6.89996192	0.007992082	0.013379115	-6.223873517
A37V	37	A	V	0.009760483	0.025109364	-5.315630732	0.009810201	0.025930521	-5.269204999	0.008845943	0.014808518	-6.077428959
A37W	37	A	W	0.035133423	0.090382609	-3.467810992	0.018870235	0.049878186	-4.325447185	0.038434548	0.064341212	-3.958113079
A37Y	37	A	Y	0.044968979	0.115685104	-3.11172498	0.01519184	0.040155378	-4.63826297	0.043677076	0.073117446	-3.77364052
S38A	38	S	A	0.026996072	0.04798329	-4.381324116	0.015585748	0.024124767	-5.373341202	0.007728077	0.011368587	-6.458803187
S38C	38	S	C	0.035849744	0.06371996	-3.972110819	0.020472939	0.031689521	-4.979850348	0.043749597	0.064358976	-3.957714823
S38D	38	S	D	0.01154671	0.020523323	-5.606591832	0.011070013	0.017134979	-5.866911741	0.014499486	0.021329843	-5.550982823
S38E	38	S	E	0.005642874	0.010029742	-6.639571628	0.005927376	0.009174829	-6.768103094	0.00612335	0.009007913	-6.794591391
S38F	38	S	F	0.020107974	0.035740264	-4.806305908	0.044871393	0.069455241	-3.847772637	0.018361881	0.027011719	-5.210270729
S38G	38	S	G	0.00329772	0.005861425	-7.41453286	0.021175858	0.03277755	-4.931148161	0.003241262	0.004768143	-7.712356854
S38H	38	S	H	0.013540557	0.024067222	-5.37678654	0.008666679	0.013414923	-6.220017456	0.009034616	0.013290606	-6.23344931
S38I	38	S	I	0.027630657	0.049111212	-4.347803777	0.014970342	0.023172195	-5.431461456	0.040967227	0.060265899	-4.0525143
S38K	38	S	K	0.032228968	0.05728433	-4.125715647	0.020302412	0.031425566	-4.991917439	0.031453711	0.046270794	-4.433754325
S38L	38	S	L	0.023993748	0.042646906	-4.551415105	0.005611985	0.008686643	-6.846985471	0.004728201	0.006955542	-7.167621391
S38M	38	S	M	0.10369595	0.184310992	-2.439785984	0.045472147	0.070385132	-3.828585477	0.02816011	0.041425658	-4.593331593
S38N	38	S	N	0.021190216	0.037663861	-4.730675294	0.046908818	0.072608916	-3.783709468	0.019987793	0.029403559	-5.087865388
S38P	38	S	P	0.007307236	0.01298801	-6.266675826	0.007843756	0.012141143	-6.363951972	0.003925199	0.005774266	-7.43614681
S38Q	38	S	Q	0.023192914	0.04122349	-4.600389529	0.012458873	0.01928476	-5.696395022	0.016714384	0.024588127	-5.345894336
S38R	38	S	R	0.003318708	0.005898729	-7.405380196	0.00519064	0.008034454	-6.959584281	0.00517356	0.007610699	-7.037755335
S38S	38	S	S	0.562614029	1	0	0.64604762	1	0	0.679774602	1	0
S38T	38	S	T	0.014535413	0.025835497	-5.274501578	0.016303312	0.025235466	-5.308403485	0.009356219	0.013763708	-6.182987039
S38V	38	S	V	0.008242002	0.014649478	-6.093006955	0.007816834	0.012099471	-6.368912215	0.01593537	0.023442138	-5.414752054
S38W	38	S	W	0.010471614	0.018612429	-5.747589849	0.012165624	0.018830848	-5.730758226	0.01833146	0.026966968	-5.212662871
S38Y	38	S	Y	0.044596898	0.079267305	-3.657130267	0.031137629	0.048197111	-4.374909511	0.022753894	0.033472704	-4.90087107
N39A	39	N	A	0.106038567	0.492792933	-1.020946527	0.038405721	0.119922066	-3.059830951	0.28447996	1.13997815	0.189006172
N39C	39	N	C	0.091980992	0.427463176	-1.22612795	0.024742121	0.077257404	-3.694182989	0.034096412	0.136632347	-2.871629015
N39D	39	N	D	0.05721098	0.265876534	-1.911171643	0.025832945	0.080663508	-3.631940048	0.045851238	0.183736701	-2.444288267
N39E	39	N	E	0.002412466	0.011211453	-6.478882911	0.011821971	0.036914166	-4.759681629	0.012658131	0.05072411	-4.301184546
N39F	39	N	F	0.013342205	0.062005215	-4.011466624	0.043134933	0.134689054	-2.892295487	0.004617999	0.018505408	-5.755909219
N39G	39	N	G	0.026714362	0.124149631	-3.009848126	0.02381815	0.074372298	-3.74909083	0.012132638	0.048618337	-4.362355657
N39H	39	N	H	0.056004693	0.260270557	-1.941915979	0.053392683	0.166718933	-2.584510146	0.023153297	0.09278071	-3.430031306
N39I	39	N	I	0.02391046	0.111119061	-3.169821787	0.006995015	0.02184197	-5.516753179	0.009228918	0.036982447	-4.757015497
N39K	39	N	K	NA	NA	NA	NA	NA	NA	NA	NA	NA
N39L	39	N	L	0.088653266	0.411998239	-1.279289925	0.087763197	0.274041043	-1.867536114	0.013582836	0.05442962	-4.199464219
N39M	39	N	M	0.007833861	0.036406297	-4.779668189	0.017790133	0.055549783	-4.170074916	0.033767969	0.135316198	-2.885593548
N39N	39	N	N	0.215178749	1	0	0.320255666	1	0	0.249548608	1	0
N39P	39	N	P	0.002376775	0.011045585	-6.500386406	0.0012717	0.003970889	-7.976322336	0.000879339	0.003523718	-8.14868568
N39Q	39	N	Q	0.038132659	0.17721387	-2.496436568	0.051568755	0.161023708	-2.634654976	0.118103841	0.473269887	-1.079264966
N39R	39	N	R	0.046539496	0.216282957	-2.209008111	0.069016906	0.215505653	-2.214202383	0.022653817	0.090779178	-3.461494766
N39S	39	N	S	0.049214579	0.228714868	-2.128377943	0.072281884	0.225700562	-2.147518087	0.003263855	0.013079034	-6.256600192
N39T	39	N	T	0.036236401	0.168401392	-2.570024032	0.016971312	0.05299301	-4.238054127	0.014134413	0.056639918	-4.142037019
N39V	39	N	V	0.006813119	0.031662602	-4.981076366	0.013071156	0.040814754	-4.614765426	0.00402018	0.016109807	-5.955916982
N39W	39	N	W	0.056412673	0.262166563	-1.931444399	0.031343606	0.097870573	-3.352981039	0.010865705	0.043541439	-4.521467112
N39Y	39	N	Y	0.026808918	0.124589061	-3.004750689	0.046936557	0.146559648	-2.770440156	0.055204489	0.221217378	-2.176463369
S40A	40	S	A	0.142293367	0.504980783	-0.985699609	0.35463724	1.590481402	0.669463502	0.160337264	0.564574055	-0.824765263
S40C	40	S	C	0.045182487	0.160346811	-2.640732433	0.068026118	0.305084361	-1.712719865	0.168051771	0.591738114	-0.756969273
S40D	40	S	D	0.005508286	0.019548194	-5.676820867	0.00320963	0.014394588	-6.118329654	0.003582637	0.012615058	-6.308709381
S40E	40	S	E	0.003314666	0.011763321	-6.409560772	0.001600027	0.007175822	-7.122640163	0.003714515	0.013079424	-6.256557194
S40F	40	S	F	0.006276237	0.022273554	-5.488524421	0.015967862	0.071612863	-3.803637445	0.006680772	0.023524104	-5.409716434
S40G	40	S	G	0.072481391	0.257227097	-1.958885468	0.042269155	0.189569221	-2.399203354	0.090540026	0.318806423	-1.649247401
S40H	40	S	H	0.020455771	0.072594889	-3.783988217	0.002416549	0.01083777	-6.52778826	0.001748878	0.00615809	-7.343301317
S40I	40	S	I	0.036656802	0.130090256	-2.942415188	0.009895697	0.04438034	-4.493935465	0.019054358	0.06709355	-3.897682113
S40K	40	S	K	0.102918523	0.365244546	-1.453065363	0.060648927	0.271999047	-1.8783265	0.027694077	0.09751543	-3.358225677
S40L	40	S	L	0.012324819	0.04373919	-4.514929699	0.002366859	0.010614916	-6.557763208	0.003530609	0.012431859	-6.329814125
S40M	40	S	M	0.013430152	0.047661876	-4.391020438	0.012556603	0.056314007	-4.150362388	0.064260951	0.226273451	-2.143860776
S40N	40	S	N	0.016163461	0.057362034	-4.123759996	0.006014884	0.026975626	-5.212199749	0.004743627	0.016703096	-5.903740613
S40P	40	S	P	0.009833876	0.034899155	-4.840664065	0.015958657	0.071571578	-3.804469401	0.002238407	0.007881801	-6.987259017
S40Q	40	S	Q	0.028253644	0.100268535	-3.318059153	0.002433044	0.010911744	-6.51797451	0.014674677	0.051671969	-4.274474329
S40R	40	S	R	0.066827931	0.237163696	-2.076044911	0.035362672	0.158594943	-2.656581329	0.005723489	0.020153352	-5.632836395
S40S	40	S	S	0.281779766	1	0	0.22297478	1	0	0.283996868	1	0
S40T	40	S	T	0.020730356	0.073569357	-3.764751217	0.06775788	0.303881364	-1.718419891	0.112662014	0.396701606	-1.333873856
S40V	40	S	V	0.039081357	0.138694689	-2.850015551	0.054769903	0.245632725	-2.025425314	0.015525882	0.0546692	-4.193127929
S40W	40	S	W	0.009616824	0.034128868	-4.872863642	0.002993015	0.013423111	-6.219137112	0.002970887	0.010460985	-6.578837542
S40Y	40	S	Y	0.066870285	0.237314007	-2.075130839	0.018140497	0.081356721	-3.619594663	0.008268292	0.029114026	-5.102141832
A41A	41	A	A	0.43917082	1	0	0.570649961	1	0	0.668464053	1	0
A41C	41	A	C	0.198929614	0.452966375	-1.142524135	0.052632582	0.092232692	-3.438577984	0.022610275	0.03382422	-4.885799533
A41D	41	A	D	0.010165292	0.023146556	-5.433058641	0.020699501	0.036273552	-4.784938177	0.019851082	0.029696559	-5.073560413
A41E	41	A	E	0.010491901	0.02389025	-5.387434231	0.011858242	0.020780237	-5.588644063	0.012107339	0.018112177	-5.786896212
A41F	41	A	F	0.032904479	0.074924101	-3.738426321	0.011745284	0.020582292	-5.60245256	0.006988662	0.010454806	-6.579689934
A41G	41	A	G	0.005394564	0.01228352	-6.347132094	0.004432007	0.007766595	-7.008502116	0.005209087	0.00779262	-7.003675733
A41H	41	A	H	0.007485447	0.017044499	-5.874550014	0.005397437	0.009458403	-6.724187645	0.004355817	0.006516157	-7.261762944
A41I	41	A	I	0.007184184	0.016358518	-5.93381417	0.009862958	0.017283726	-5.85444192	0.008794642	0.013156492	-6.248081318
A41K	41	A	K	0.008414284	0.019159479	-5.705797891	0.01251648	0.021933727	-5.510705226	0.022113883	0.033081634	-4.917825709
A41L	41	A	L	0.01015002	0.023111781	-5.435227738	0.017498197	0.030663627	-5.027327852	0.003373714	0.005046964	-7.630368473
A41M	41	A	M	0.012472372	0.02839982	-5.13797438	0.023042593	0.040379558	-4.630231075	0.029097858	0.043529428	-4.521865128
A41N	41	A	N	0.018769548	0.042738605	-4.548316371	0.010938294	0.019168132	-5.705146458	0.016839521	0.025191363	-5.310926987
A41P	41	A	P	0.016894649	0.038469426	-4.700143875	0.012162611	0.021313611	-5.552081182	0.007682942	0.011493425	-6.44304737
A41Q	41	A	Q	0.011838043	0.026955441	-5.213279699	0.017871251	0.031317362	-4.996893512	0.010114614	0.015131126	-6.046336807
A41R	41	A	R	0.015525332	0.035351465	-4.822086196	0.01881079	0.032963797	-4.922973746	0.005193746	0.007769671	-7.007930692
A41S	41	A	S	0.154594333	0.352014128	-1.506294764	0.134194707	0.235161161	-2.08827829	0.09069778	0.135680863	-2.881710839
A41T	41	A	T	0.004835705	0.011010989	-6.504912148	0.013730807	0.024061698	-5.37711773	0.011033666	0.016505998	-5.92086581
A41V	41	A	V	0.003345123	0.007616906	-7.036579224	0.005326703	0.009334449	-6.743219393	0.006830701	0.010218502	-6.612672494
A41W	41	A	W	0.020450959	0.046567209	-4.424541787	0.019548395	0.034256368	-4.867483979	0.019643488	0.029386005	-5.088726949
A41Y	41	A	Y	0.010983332	0.025009248	-5.321394509	0.0270812	0.047456764	-4.397242472	0.02899713	0.043378742	-4.52686796
N42A	42	N	A	0.015382305	0.046441109	-4.42845377	0.045498229	0.121399039	-3.042171091	0.00864177	0.020506394	-5.607782358
N42C	42	N	C	0.06270939	0.189327516	-2.401043992	0.040505974	0.108078633	-3.209846762	0.118409308	0.280978078	-1.831470519
N42D	42	N	D	0.032362109	0.097705269	-3.355419826	0.034653967	0.092464222	-3.434960943	0.019281321	0.045753402	-4.449977185
N42E	42	N	E	0.02012253	0.060752443	-4.040913773	0.022113549	0.059003695	-4.083050882	0.010526872	0.024979627	-5.323104246
N42F	42	N	F	0.013933751	0.042067743	-4.571141773	0.067142844	0.179151519	-2.480747817	0.00627309	0.014885659	-6.06993305
N42G	42	N	G	0.024278891	0.073301018	-3.770022953	0.016316944	0.04353711	-4.521610561	0.016739545	0.03972192	-4.653920817
N42H	42	N	H	0.102310276	0.308887562	-1.694846314	0.040594219	0.108314089	-3.206707184	0.051826612	0.122981394	-3.023488026
N42I	42	N	I	0.009711733	0.029320939	-5.09192487	0.019404712	0.051775937	-4.271574434	0.010962832	0.026014134	-5.264560529
N42K	42	N	K	NA	NA	NA	NA	NA	NA	NA	NA	NA
N42L	42	N	L	0.005882268	0.017759306	-5.815281	0.00275494	0.007350772	-7.08788843	0.004281785	0.010160414	-6.620896967
N42M	42	N	M	0.037598853	0.113515656	-3.139036805	0.043076637	0.114937713	-3.121075852	0.067589501	0.160385769	-2.640381954
N42N	42	N	N	0.331221741	1	0	0.374782445	1	0	0.421418315	1	0
N42P	42	N	P	0.004160334	0.012560569	-6.314954381	0.00299788	0.007998987	-6.965967051	0.005897217	0.013993737	-6.15907493
N42Q	42	N	Q	0.042049486	0.126952675	-2.977637298	0.007316893	0.019523042	-5.678678355	0.019327344	0.045862611	-4.446537698
N42R	42	N	R	0.002993136	0.009036654	-6.789995537	0.010041428	0.026792684	-5.22201708	0.008279505	0.019646761	-5.669564703
N42S	42	N	S	0.064754494	0.195501944	-2.354745143	0.027339726	0.072948257	-3.776982674	0.032822236	0.077885167	-3.682507594
N42T	42	N	T	0.035075824	0.105898313	-3.239248491	0.025517262	0.068085532	-3.876507921	0.062051864	0.147245296	-2.763706551
N42V	42	N	V	0.023375138	0.070572474	-3.824750609	0.010476826	0.02795442	-5.160779776	0.008400401	0.019933641	-5.648650944
N42W	42	N	W	0.082370825	0.248687857	-2.007592031	0.103813168	0.276995812	-1.852063932	0.033806308	0.080220309	-3.639888658
N42Y	42	N	Y	0.04572182	0.138039912	-2.856842632	0.050450605	0.134613042	-2.893109905	0.043976725	0.104354092	-3.260440926
R43A	43	R	A	0.00519769	0.007798051	-7.002670746	0.003789928	0.006407093	-7.286114463	0.005382547	0.008476416	-6.882329963
R43C	43	R	C	0.0267546	0.040139703	-4.638826253	0.016602288	0.028067128	-5.15497474	0.009028129	0.014217464	-6.136192065
R43D	43	R	D	0.042766584	0.06416235	-3.962129214	0.013627491	0.02303806	-5.439836929	0.009150362	0.014409956	-6.116790295
R43E	43	R	E	0.009156992	0.013738159	-6.185667493	0.02570338	0.043453049	-4.524398791	0.046199866	0.072755377	-3.780802314
R43F	43	R	F	0.034574322	0.051871567	-4.268912224	0.029074936	0.04915286	-4.346580819	0.050283978	0.079187022	-3.658592189
R43G	43	R	G	0.009170313	0.013758144	-6.183570362	0.018293567	0.030926333	-5.015020411	0.006789398	0.010691919	-6.547335422
R43H	43	R	H	0.012381897	0.018576457	-5.750380858	0.010608057	0.017933534	-5.801196371	0.007926855	0.012483182	-6.323870452
R43I	43	R	I	0.01174065	0.0176144	-5.827100882	0.021308096	0.036022567	-4.794955197	0.024485673	0.038559947	-4.696753113
R43K	43	R	K	0.006606352	0.009911455	-6.656687438	0.046033651	0.077822547	-3.683667992	0.033106356	0.052135766	-4.26158276
R43L	43	R	L	0.014481589	0.021726607	-5.524393291	0.019423893	0.032837214	-4.92852444	0.01969654	0.031018039	-5.010748726
R43M	43	R	M	0.013271048	0.019910443	-5.650330883	0.01027011	0.017362214	-5.847905286	0.041099494	0.06472333	-3.949570352
R43N	43	R	N	0.009382715	0.014076809	-6.150535829	0.069641147	0.117732384	-3.086416886	0.010008429	0.015761236	-5.987475477
R43P	43	R	P	0.015974862	0.023966953	-5.38280969	0.010694035	0.018078885	-5.78955049	0.009932401	0.015641508	-5.998476611
R43Q	43	R	Q	0.017788513	0.026687957	-5.227667305	0.017298161	0.029243541	-5.095738186	0.024623583	0.038777127	-4.688650283
R43R	43	R	R	0.666537061	1	0	0.591520741	1	0	0.63500277	1	0
R43S	43	R	S	0.005291154	0.007938274	-6.97695887	0.003610283	0.006103392	-7.356173033	0.010625621	0.016733189	-5.901143764
R43T	43	R	T	0.019430467	0.029151368	-5.100292601	0.019206579	0.032469832	-4.944756278	0.006644917	0.010464391	-6.578367897
R43V	43	R	V	0.006898857	0.010350298	-6.594183824	0.011562561	0.019547177	-5.676895905	0.003469746	0.005464143	-7.515789141
R43W	43	R	W	NA	NA	NA	NA	NA	NA	NA	NA	NA
R43Y	43	R	Y	0.014820534	0.022235124	-5.491015763	0.013339893	0.022551861	-5.470609726	0.010458016	0.016469245	-5.924081729
Q44A	44	Q	A	0.016937236	0.13929154	-2.843820455	0.014539937	0.063010661	-3.988260246	0.003681091	0.015108857	-6.048461695
Q44C	44	Q	C	0.032875101	0.270364276	-1.887023556	0.051105106	0.221470458	-2.174813827	0.015595004	0.064008931	-3.96558298
Q44D	44	Q	D	0.042620287	0.350508518	-1.512478591	0.085799025	0.371820952	-1.427320025	0.044760931	0.183719057	-2.444426808
Q44E	44	Q	E	0.023882156	0.196406446	-2.348085818	0.005196391	0.022519219	-5.472699397	0.046251409	0.189836651	-2.397169538
Q44F	44	Q	F	0.029733693	0.244529393	-2.031920206	0.035406807	0.153439886	-2.704254539	0.0247686	0.101661511	-3.298154512
Q44G	44	Q	G	0.042310436	0.347960314	-1.523005324	0.052667376	0.228240753	-2.131371684	0.016704517	0.068562876	-3.866428557
Q44H	44	Q	H	NA	NA	NA	NA	NA	NA	NA	NA	NA
Q44I	44	Q	I	0.0161013	0.132416823	-2.916841669	0.024460016	0.106000579	-3.237855949	0.006130278	0.025161426	-5.312642528
Q44K	44	Q	K	0.008741032	0.071886096	-3.798143434	0.018250924	0.079092692	-3.660311797	0.020635581	0.084697736	-3.561532786
Q44L	44	Q	L	0.021954282	0.180551642	-2.469516557	0.023338831	0.101141785	-3.305548952	0.036412518	0.149453402	-2.742232353
Q44M	44	Q	M	0.191716505	1.576673301	0.656883753	0.094501124	0.409532601	-1.287949793	0.12706447	0.521529914	-0.93917809
Q44N	44	Q	N	0.208437469	1.714186223	0.777523847	0.055730999	0.241517348	-2.049801273	0.202192202	0.82988802	-0.269011413
Q44P	44	Q	P	0.021355537	0.175627578	-2.509408693	0.024914281	0.107969194	-3.211308354	0.005291568	0.021718984	-5.524899578
Q44Q	44	Q	Q	0.12159558	1	0	0.230753604	1	0	0.243637933	1	0
Q44R	44	Q	R	0.006427147	0.052856748	-4.241768527	0.008970222	0.038873595	-4.68506566	0.023853133	0.09790402	-3.35248809
Q44S	44	Q	S	0.06245621	0.513638814	-0.961173868	0.037497825	0.162501579	-2.621474356	0.025794044	0.105870396	-3.239628869
Q44T	44	Q	T	0.019951534	0.164081076	-2.607519239	0.08925979	0.386818617	-1.370270865	0.015718358	0.064515234	-3.954216324
Q44V	44	Q	V	0.028786223	0.23673741	-2.078640389	0.027497007	0.119161766	-3.069006688	0.017786987	0.073005821	-3.775844696
Q44W	44	Q	W	0.016968606	0.139549529	-2.841150836	0.017832983	0.077281492	-3.693733243	0.069534225	0.285399831	-1.808943616
Q44Y	44	Q	Y	0.033775805	0.277771647	-1.848028746	0.043248936	0.187424748	-2.415616635	0.005815268	0.023868485	-5.388749192
D45A	45	D	A	0.022201984	0.171521477	-2.543538861	0.005453427	0.027730748	-5.172369668	0.005887649	0.025397451	-5.299172479
D45C	45	D	C	0.10288644	0.794849436	-0.331246491	0.059918031	0.304683998	-1.714614365	0.202824202	0.874919233	-0.192778252
D45D	45	D	D	0.129441421	1	0	0.196656312	1	0	0.231820486	1	0
D45E	45	D	E	NA	NA	NA	NA	NA	NA	NA	NA	NA
D45F	45	D	F	0.070315341	0.543221331	-0.880387962	0.076284857	0.387909527	-1.366207885	0.01226882	0.052923796	-4.23993964
D45G	45	D	G	0.016848324	0.130161768	-2.941622338	0.004357923	0.022160096	-5.495892053	0.001638831	0.007069397	-7.144197188
D45H	45	D	H	0.049118692	0.37946657	-1.397955301	0.033449738	0.17009237	-2.555609665	0.002567768	0.011076535	-6.496349553
D45I	45	D	I	0.034953335	0.270032071	-1.888797331	0.003371748	0.017145383	-5.866036038	0.040766864	0.175855314	-2.507539162
D45K	45	D	K	0.014500338	0.112022395	-3.158140917	0.004078282	0.020738118	-5.591571231	0.002834852	0.012228651	-6.353590923
D45L	45	D	L	0.050734391	0.391948659	-1.351263407	0.02753865	0.140034406	-2.836146756	0.052869177	0.228060849	-2.132509292
D45M	45	D	M	0.107209285	0.82824558	-0.271869496	0.102458864	0.521004705	-0.940631693	0.002502912	0.01079677	-6.533256442
D45N	45	D	N	0.032334529	0.249800481	-2.00115184	0.021101639	0.10730212	-3.220249515	0.028317582	0.122153063	-3.033238053
D45P	45	D	P	0.036816531	0.284426199	-1.813873736	0.039485361	0.200783592	-2.316286719	0.012827945	0.055335681	-4.175646139
D45Q	45	D	Q	0.027228149	0.210351125	-2.249128558	0.004376262	0.02225335	-5.489833647	0.268541542	1.158402983	0.212137222
D45R	45	D	R	0.011066433	0.085493758	-3.548037104	0.037094819	0.188627657	-2.40638687	0.003504619	0.015117815	-6.04760655
D45S	45	D	S	0.03092991	0.23894909	-2.065224819	0.126879754	0.645185262	-0.632214612	0.014161512	0.061088267	-4.032960881
D45T	45	D	T	0.043202709	0.333762633	-1.583105651	0.041377513	0.210405211	-2.248757661	0.015285767	0.065937946	-3.922747248
D45V	45	D	V	0.011491609	0.088778456	-3.493646574	0.051016577	0.259419983	-1.946638479	0.012308056	0.053093047	-4.235333243
D45W	45	D	W	0.069713886	0.538574794	-0.892781384	0.046732669	0.237636254	-2.073173142	0.011318681	0.048825199	-4.356230262
D45Y	45	D	Y	0.093839555	0.724957706	-0.464031265	0.07336768	0.373075642	-1.422459924	0.023367229	0.10079881	-3.310449495
F46A	46	F	A	0.052056945	0.386620664	-1.371009345	0.052126201	0.20329187	-2.298375575	0.084918565	0.31332295	-1.674277646
F46C	46	F	C	0.008396409	0.062359115	-4.003255725	0.086040567	0.335557695	-1.575367254	0.039443868	0.14553554	-2.780556587
F46D	46	F	D	0.039466765	0.293114908	-1.770461751	0.008357681	0.032594906	-4.939209658	0.011489418	0.042392359	-4.560051952
F46E	46	F	E	0.037911131	0.281561403	-1.828478515	0.020725718	0.080830176	-3.628962203	0.011319268	0.041764558	-4.581577006
F46F	46	F	F	0.13464605	1	0	0.256410652	1	0	0.271025677	1	0
F46G	46	F	G	0.026787261	0.198945762	-2.329552927	0.048585019	0.189481281	-2.399872766	0.014081302	0.051955602	-4.266576867
F46H	46	F	H	0.050136509	0.372357815	-1.425238457	0.019213986	0.074934429	-3.738227467	0.00854351	0.031522881	-4.987456781
F46I	46	F	I	0.041850367	0.310817635	-1.685859736	0.010281194	0.040096594	-4.640376491	0.025553892	0.094285872	-3.406814583
F46K	46	F	K	0.003713438	0.027579254	-5.180272773	0.029178856	0.113797362	-3.135460978	0.015480694	0.057118922	-4.129887442
F46L	46	F	L	0.070382271	0.522720654	-0.935887929	0.055358326	0.215897138	-2.211583973	0.021296192	0.078576291	-3.669762121
F46M	46	F	M	0.058711492	0.436043182	-1.197457081	0.013619179	0.053114717	-4.234744536	0.113310806	0.418081444	-1.258144084
F46N	46	F	N	0.062240748	0.46225454	-1.113240605	0.036798292	0.143513118	-2.800745479	0.033741473	0.124495486	-3.005834658
F46P	46	F	P	0.02768382	0.205604395	-2.282056994	0.025468245	0.099326003	-3.33168474	0.009529015	0.035159088	-4.829958561
F46Q	46	F	Q	0.057003992	0.423361788	-1.240037036	0.052446209	0.204539899	-2.289545799	0.04488812	0.165623127	-2.594023952
F46R	46	F	R	0.028361391	0.210636633	-2.247171731	0.024581679	0.0958684	-3.382800837	0.020152158	0.074355161	-3.749423307
F46S	46	F	S	0.020134044	0.149533119	-2.741463039	0.048901151	0.190714193	-2.390515881	0.047983156	0.177042844	-2.497829567
F46T	46	F	T	0.032668394	0.242624231	-2.043204456	0.059896446	0.233595779	-2.097913891	0.057398167	0.211781287	-2.239352975
F46V	46	F	V	0.104748309	0.777953079	-0.362244951	0.085485054	0.333391198	-1.584712079	0.1453038	0.536125588	-0.8993571
F46W	46	F	W	0.105365121	0.78253407	-0.35377453	0.060863654	0.237367885	-2.074803335	0.012970306	0.047856373	-4.385145141
F46Y	46	F	Y	0.037735543	0.280257336	-1.835175957	0.005661892	0.022081345	-5.501028168	0.011570612	0.042691939	-4.549892504
T47A	47	T	A	0.027033354	0.240222892	-2.057554456	0.123732376	1.45144718	0.537492071	0.004177909	0.019900843	-5.65102661
T47C	47	T	C	0.071527844	0.635608339	-0.653790042	0.096914539	1.13685955	0.185054031	0.197085191	0.938785856	-0.091131989
T47D	47	T	D	0.003750573	0.033328214	-4.907112196	0.044688672	0.52422211	-0.93174989	0.077285896	0.368139815	-1.441674305
T47E	47	T	E	0.014309001	0.127152166	-2.975372052	0.105213518	1.234211031	0.303589094	0.035130113	0.167337045	-2.579171235
T47F	47	T	F	0.021059052	0.187134242	-2.41785453	0.012554015	0.147265338	-2.763510197	0.004841759	0.023062994	-5.438276389
T47G	47	T	G	0.069062961	0.61370498	-0.704382805	0.01638065	0.192153816	-2.379666471	0.127628002	0.607936916	-0.718006469
T47H	47	T	H	0.097498526	0.866388153	-0.206914579	0.035689984	0.418662666	-1.256139821	0.061006784	0.290596699	-1.782909779
T47I	47	T	I	0.015724817	0.139733344	-2.839251773	0.019433281	0.227962813	-2.133129592	0.009262671	0.044121351	-4.502379228
T47K	47	T	K	0.034205902	0.303959349	-1.718049703	0.037487033	0.439743017	-1.185267426	0.004077331	0.019421759	-5.686182343
T47L	47	T	L	0.031615935	0.280944464	-1.83164312	0.02965702	0.347892758	-1.523285449	0.017005446	0.081002899	-3.625882652
T47M	47	T	M	0.017870147	0.158797103	-2.654743503	0.004453135	0.052237662	-4.258765852	0.050836542	0.242152272	-2.046013557
T47N	47	T	N	0.051537928	0.45797462	-1.126660446	0.041831599	0.49070711	-1.027065919	0.056969189	0.271364216	-1.881697604
T47P	47	T	P	0.020818523	0.184996861	-2.434427304	0.009636105	0.113036678	-3.145137119	0.023103402	0.110049603	-3.183774154
T47Q	47	T	Q	0.126611274	1.125088882	0.170038979	0.050633339	0.593956243	-0.751571445	0.046685073	0.22237737	-2.168918114
T47R	47	T	R	0.034196003	0.303871383	-1.718467278	0.032980572	0.386879807	-1.370042664	0.008034324	0.0382703	-4.707630979
T47S	47	T	S	0.070562543	0.627030513	-0.673392445	0.041382286	0.485436419	-1.042645748	0.039191377	0.186682268	-2.421343194
T47T	47	T	T	0.112534464	1	0	0.085247592	1	0	0.20993626	1	0
T47V	47	T	V	0.071594795	0.636203278	-0.65244029	0.048319573	0.566814519	-0.81905138	0.006489599	0.030912235	-5.015678242
T47W	47	T	W	0.029175427	0.259257704	-1.947541234	0.050074747	0.587403652	-0.76757586	0.006856665	0.032660698	-4.93630057
T47Y	47	T	Y	0.079310933	0.704770164	-0.504775245	0.113689966	1.333644313	0.415373946	0.014396466	0.068575416	-3.866164723
Q48A	48	Q	A	0.087191835	0.838820607	-0.25356579	0.056759507	0.43851807	-1.189291801	0.003567594	0.034899145	-4.840664479
Q48C	48	Q	C	0.176151459	1.694648068	0.760985696	0.300752768	2.323584727	1.216352252	0.085256937	0.834005937	-0.261870441
Q48D	48	Q	D	0.055470656	0.53365008	-0.906034034	0.007861568	0.060737663	-4.04126479	0.01728692	0.16910523	-2.564006813
Q48E	48	Q	E	0.089204653	0.85818473	-0.220639863	0.062793989	0.485139856	-1.043527387	0.001143392	0.011184962	-6.48229585
Q48F	48	Q	F	0.023649769	0.227520313	-2.135932739	0.060335009	0.466142031	-1.101158492	0.500262334	4.893698637	2.29092526
Q48G	48	Q	G	0.0179016	0.172220615	-2.53767025	0.039165175	0.302586087	-1.724582442	0.006182887	0.060482639	-4.04733511
Q48H	48	Q	H	NA	NA	NA	NA	NA	NA	NA	NA	NA
Q48I	48	Q	I	0.03442718	0.331203356	-1.594210804	0.070811547	0.547082676	-0.870169223	0.090253543	0.882884058	-0.179704102
Q48K	48	Q	K	0.022436616	0.215849296	-2.211903705	0.003785454	0.029246026	-5.095615589	0.040971464	0.400793715	-1.319068211
Q48L	48	Q	L	0.026020906	0.25033161	-1.998087618	0.0270025	0.208618516	-2.261060881	0.013060624	0.127762482	-2.968463848
Q48M	48	Q	M	0.047058876	0.452725366	-1.143291951	0.003023096	0.023356126	-5.42005518	0.019808321	0.19377024	-2.367581083
Q48N	48	Q	N	0.031593719	0.303944315	-1.718121062	0.004748395	0.03668561	-4.768641908	0.000745028	0.007288062	-7.100249134
Q48P	48	Q	P	0.024552908	0.236208877	-2.081864911	0.006127391	0.047339585	-4.400809129	0.007826163	0.0765576	-3.707310579
Q48Q	48	Q	Q	0.103945747	1	0	0.129434819	1	0	0.102225815	1	0
Q48R	48	Q	R	0.014378223	0.138324307	-2.853873402	0.009727959	0.075157206	-3.733944756	0.003023295	0.029574669	-5.079494171
Q48S	48	Q	S	0.056325375	0.541872823	-0.883973802	0.048355643	0.373590689	-1.420469595	0.01592829	0.155814754	-2.682096249
Q48T	48	Q	T	0.038199832	0.367497784	-1.444192546	0.050294296	0.388568523	-1.363759059	0.018536377	0.181327747	-2.463328394
Q48V	48	Q	V	0.05369604	0.516577554	-0.952943136	0.030217333	0.233455984	-2.098777529	0.006934319	0.067833348	-3.881861487
Q48W	48	Q	W	0.005776706	0.055574239	-4.169439913	0.008319099	0.064272495	-3.959654721	0.007616466	0.074506289	-3.746493988
Q48Y	48	Q	Y	0.041173122	0.396102034	-1.336055987	0.031014635	0.239615855	-2.061204725	0.00928395	0.090818058	-3.460877002
D49A	49	D	A	0.039020431	0.208942056	-2.258825189	0.055910573	0.267006174	-1.905054994	0.018423951	0.063650329	-3.973688211
D49C	49	D	C	0.0457966	0.245226299	-2.027814389	0.012655503	0.06043754	-4.048411253	0.008661699	0.029924093	-5.062548694
D49D	49	D	D	0.186752401	1	0	0.209398052	1	0	0.289455698	1	0
D49E	49	D	E	NA	NA	NA	NA	NA	NA	NA	NA	NA
D49F	49	D	F	0.034506944	0.184773763	-2.43616818	0.043946992	0.209872974	-2.252411695	0.006697163	0.02313709	-5.433648744
D49G	49	D	G	0.028930969	0.154916184	-2.690440222	0.022725424	0.10852739	-3.203868897	0.011604145	0.040089537	-4.640630419
D49H	49	D	H	0.016243954	0.086981232	-3.523152038	0.138636746	0.662072759	-0.594938324	0.451102188	1.558449843	0.640111724
D49I	49	D	I	0.039714851	0.212660456	-2.233376306	0.022524183	0.107566347	-3.216701309	0.003760134	0.012990361	-6.266414635
D49K	49	D	K	0.02778997	0.148806493	-2.74849062	0.01000446	0.047777237	-4.387532764	0.008333358	0.028789751	-5.118300863
D49L	49	D	L	0.031891786	0.170770418	-2.549870008	0.009137508	0.043637023	-4.518303503	0.012636003	0.043654358	-4.517730516
D49M	49	D	M	0.011018582	0.05900102	-4.0831163	0.039918401	0.19063406	-2.391122194	0.007596913	0.026245511	-5.251785517
D49N	49	D	N	0.095849984	0.513246329	-0.962276692	0.049496887	0.236377015	-2.080838338	0.058458634	0.201960555	-2.307854546
D49P	49	D	P	0.046787579	0.250532674	-1.996929324	0.019588365	0.093546071	-3.41817913	0.015472863	0.053455029	-4.225530513
D49Q	49	D	Q	0.068828771	0.368556283	-1.440043142	0.016232632	0.077520452	-3.689279212	0.006855124	0.023682809	-5.400015956
D49R	49	D	R	0.019272092	0.103195953	-3.276541701	0.010363412	0.049491445	-4.336677018	0.011738001	0.040551979	-4.624083857
D49S	49	D	S	0.055860438	0.299114963	-1.741228014	0.018697468	0.089291509	-3.485333192	0.013163854	0.045477958	-4.458688698
D49T	49	D	T	0.049847946	0.266919974	-1.905520826	0.067066879	0.320284159	-1.642575652	0.004307009	0.014879683	-6.070512382
D49V	49	D	V	0.104669462	0.560471842	-0.835286201	0.009798542	0.046793856	-4.417537061	0.008269548	0.028569303	-5.129390352
D49W	49	D	W	0.033055962	0.177004215	-2.498144378	0.188775365	0.901514428	-0.149577515	0.009392584	0.032449123	-4.945676701
D49Y	49	D	Y	0.014688659	0.078653119	-3.66835221	0.011932009	0.056982427	-4.133339126	0.00509409	0.01759886	-5.828374212
P50A	50	P	A	0.040271138	0.171010582	-2.547842491	0.017857337	0.086890171	-3.524663209	0.011907025	0.030825751	-5.019720142
P50C	50	P	C	0.126305604	0.536354218	-0.898741998	0.031487593	0.153212218	-2.70639674	0.033501476	0.086730998	-3.52730848
P50D	50	P	D	0.021540645	0.091471916	-3.450527312	0.109443168	0.532528184	-0.909070214	0.039503861	0.102270397	-3.289539486
P50E	50	P	E	0.072995116	0.309972295	-1.689788819	0.006898503	0.033566711	-4.896825022	0.120094573	0.310909348	-1.6854341
P50F	50	P	F	0.009133627	0.038785763	-4.688329019	0.034482511	0.167784882	-2.575315369	0.050121954	0.129759269	-2.946090501
P50G	50	P	G	0.051553516	0.218920971	-2.191517936	0.143427286	0.697887987	-0.518932596	0.072501827	0.187697871	-2.41351581
P50H	50	P	H	0.014163905	0.06014674	-4.055369641	0.012593571	0.061277755	-4.028492746	0.033561055	0.086885239	-3.5247451
P50I	50	P	I	0.088069362	0.373984782	-1.418948529	0.016229757	0.078970695	-3.662538809	0.013244783	0.034289033	-4.866108973
P50K	50	P	K	0.032376882	0.137487781	-2.862624686	0.027883201	0.135673983	-2.881784005	0.039514063	0.102296809	-3.28916695
P50L	50	P	L	0.026461321	0.112367469	-3.15370367	0.012709658	0.061842611	-4.015254964	0.008313508	0.021522599	-5.53800387
P50M	50	P	M	0.01254915	0.053289713	-4.229999132	0.027839766	0.135462637	-2.884033113	0.010784934	0.027920802	-5.162515815
P50N	50	P	N	0.041951947	0.178148104	-2.488850968	0.101180225	0.492322385	-1.022324758	0.020064764	0.051945083	-4.266868993
P50P	50	P	P	0.23548916	1	0	0.205516198	1	0	0.386268776	1	0
P50Q	50	P	Q	0.035225352	0.149583751	-2.74097463	0.019126122	0.09306382	-3.425635782	0.014485183	0.037500268	-4.736955292
P50R	50	P	R	0.04071202	0.172882779	-2.53213393	0.00524462	0.025519252	-5.292270138	0.057476905	0.148800286	-2.748550792
P50S	50	P	S	0.02926734	0.124283172	-3.008297121	0.055858467	0.271795936	-1.879404209	0.011511348	0.029801394	-5.068476395
P50T	50	P	T	0.016500063	0.070067186	-3.835117228	0.041001899	0.199506896	-2.325489483	0.008218065	0.021275509	-5.554662509
P50V	50	P	V	0.057686162	0.244963131	-2.029363469	0.056493762	0.27488715	-1.863088626	0.032707905	0.084676544	-3.561893802
P50W	50	P	W	0.021078445	0.089509193	-3.481820331	0.025486802	0.124013591	-3.011429861	0.023255051	0.060204325	-4.053989068
P50Y	50	P	Y	0.026669245	0.113250413	-3.142411789	0.049239555	0.239589654	-2.061362486	0.012962944	0.033559389	-4.897139729
G51A	51	G	A	0.033999529	0.382786614	-1.385387716	0.041061596	0.38377014	-1.381685632	0.137586849	0.556061444	-0.846683787
G51C	51	G	C	0.012679508	0.14275333	-2.808403694	0.175781434	1.642889524	0.71623547	0.047533917	0.192109774	-2.379997171
G51D	51	G	D	0.178370173	2.00819592	1.005900025	0.011992028	0.11207997	-3.157399621	0.191794977	0.775145248	-0.367461425
G51E	51	G	E	0.064035423	0.720948311	-0.472032266	0.023499101	0.219627445	-2.186869751	0.009144603	0.036958192	-4.757962019
G51F	51	G	F	0.045491062	0.512165026	-0.965319356	0.033023296	0.308642535	-1.695991195	0.062720706	0.253487645	-1.980012663
G51G	51	G	G	0.088821101	1	0	0.106995286	1	0	0.247431017	1	0
G51H	51	G	H	0.087030185	0.979836817	-0.029386593	0.058130606	0.543300625	-0.880177388	0.020233646	0.081774897	-3.61219815
G51I	51	G	I	0.007810585	0.087936138	-3.507400022	0.075342324	0.70416489	-0.5060148	0.010920006	0.044133538	-4.501980775
G51K	51	G	K	0.019294499	0.217228776	-2.20271287	0.058629211	0.547960691	-0.867855693	0.015702545	0.063462314	-3.977956071
G51L	51	G	L	0.019318619	0.217500329	-2.200910509	0.016648579	0.155601052	-2.684076278	0.043362124	0.175249344	-2.512519047
G51M	51	G	M	0.003165397	0.035637896	-4.81044404	0.025561848	0.238906299	-2.065483201	0.007690606	0.03108182	-5.007785221
G51N	51	G	N	0.035618287	0.401011547	-1.318284315	0.005506399	0.051463943	-4.280294181	0.111721643	0.451526428	-1.147117665
G51P	51	G	P	0.039983827	0.450161353	-1.151485892	0.016269749	0.152060425	-2.717283371	0.05612818	0.226843749	-2.140229189
G51Q	51	G	Q	0.022268778	0.250714946	-1.995880091	0.043764235	0.409029563	-1.289722976	0.004350615	0.017583144	-5.829663091
G51R	51	G	R	0.025893436	0.291523469	-1.778316063	0.064135422	0.599422874	-0.738353956	0.004461169	0.01802995	-5.793460821
G51S	51	G	S	0.025527617	0.287404865	-1.79884361	0.113712238	1.062778016	0.087840291	0.004880434	0.019724422	-5.663873179
G51T	51	G	T	0.036945216	0.415950891	-1.265514889	0.035081386	0.327877869	-1.608769567	0.009359746	0.037827699	-4.724413168
G51V	51	G	V	0.011240933	0.126557005	-2.982140726	0.016228426	0.151674212	-2.720952281	0.002214427	0.008949676	-6.803948797
G51W	51	G	W	0.128443592	1.446093216	0.532160553	0.016631005	0.155436802	-2.685599969	0.00594994	0.024046862	-5.378007538
G51Y	51	G	Y	0.114062236	1.284179487	0.360846859	0.062005831	0.579519276	-0.787071445	0.00681285	0.027534341	-5.182624125
K52A	52	K	A	0.088460442	0.703764869	-0.506834595	0.054778441	0.309546902	-1.691770075	0.017896673	0.141456118	-2.821573518
K52C	52	K	C	0.037844908	0.301082786	-1.731767871	0.022191536	0.125401911	-2.995368756	0.448942236	3.54845989	1.827192999
K52D	52	K	D	0.025679323	0.204297025	-2.291259898	0.035369045	0.199866555	-2.322891017	0.00256278	0.020256327	-5.625483567
K52E	52	K	E	0.010673677	0.08491659	-3.557809753	0.008811991	0.049795587	-4.327838292	0.012519715	0.098956398	-3.337063201
K52F	52	K	F	0.013239598	0.105330289	-3.247007729	0.014809689	0.083687911	-3.578836961	0.013916766	0.109998755	-3.184440902
K52G	52	K	G	0.021614066	0.171955057	-2.539896549	0.011247907	0.063560678	-3.975721666	0.013400787	0.105920432	-3.238947186
K52H	52	K	H	0.038046169	0.302683962	-1.724115858	0.042087615	0.23783245	-2.071982524	0.003555114	0.028099783	-5.153297206
K52I	52	K	I	0.057168927	0.454818913	-1.136635848	0.049656739	0.280604729	-1.83338877	0.006150385	0.048612926	-4.362516221
K52K	52	K	K	0.125696019	1	0	0.1769633	1	0	0.126517489	1	0
K52L	52	K	L	0.018398482	0.146372832	-2.77228029	0.023607157	0.133401427	-2.906153991	0.002149697	0.016991304	-5.879059582
K52M	52	K	M	NA	NA	NA	NA	NA	NA	NA	NA	NA
K52N	52	K	N	NA	NA	NA	NA	NA	NA	NA	NA	NA
K52P	52	K	P	0.086573408	0.688752183	-0.537943108	0.042161887	0.238252151	-2.069438856	0.047623653	0.376419527	-1.409586624
K52Q	52	K	Q	0.158888476	1.264069274	0.338075529	0.020409624	0.115332524	-3.116128679	0.006489694	0.051294837	-4.28504257
K52R	52	K	R	0.039549641	0.314645139	-1.668202438	0.048315237	0.273024053	-1.872900039	0.01408762	0.111349194	-3.166836985
K52S	52	K	S	0.05180502	0.412145269	-1.27877516	0.031664298	0.178931442	-2.482521177	0.011952549	0.094473489	-3.403946653
K52T	52	K	T	0.028947798	0.230300036	-2.118413457	0.117828971	0.665838457	-0.586755896	0.137538248	1.087108576	0.120496038
K52V	52	K	V	0.042223558	0.335918019	-1.57381891	0.021122318	0.119359881	-3.06661009	0.02550957	0.201628806	-2.310226329
K52W	52	K	W	0.054553283	0.434009633	-1.20420103	0.133438507	0.754046219	-0.407275139	0.01187381	0.093851139	-3.413481935
K52Y	52	K	Y	0.009305084	0.074028471	-3.755775954	0.048951874	0.276621614	-1.854014206	0.019561183	0.154612479	-2.693271328
F53A	53	F	A	0.054398351	0.124018987	-3.011367083	0.016663506	0.027962635	-5.160355861	0.005400568	0.007727084	-7.015860292
F53C	53	F	C	0.020475387	0.0466804	-4.421039261	0.016286124	0.027329359	-5.19340458	0.01110316	0.015886299	-5.976073094
F53D	53	F	D	0.03086023	0.070356075	-3.82918118	0.0089268	0.014979851	-6.060832932	0.005919838	0.00847005	-6.883413741
F53E	53	F	E	0.056975468	0.129894376	-2.944589129	0.036050045	0.060494727	-4.047046804	0.077433463	0.110791091	-3.174086218
F53F	53	F	F	0.438629213	1	0	0.595920461	1	0	0.698914169	1	0
F53G	53	F	G	0.027749886	0.06326502	-3.982448157	0.0450436	0.075586597	-3.725725754	0.006405956	0.009165584	-6.769557545
F53H	53	F	H	0.002956565	0.006740466	-7.212935868	0.008251383	0.01384645	-6.174340008	0.008582757	0.01228013	-6.347530302
F53I	53	F	I	0.024314824	0.055433663	-4.173093858	0.086629675	0.145371203	-2.782186582	0.007157465	0.010240835	-6.609522856
F53K	53	F	K	0.007028908	0.016024715	-5.963557483	0.005315126	0.008919186	-6.808872192	0.013021339	0.018630813	-5.746165545
F53L	53	F	L	0.016724177	0.038128278	-4.712994816	0.027532936	0.046202368	-4.435889397	0.040721649	0.058264162	-4.101247418
F53M	53	F	M	0.063676774	0.145172214	-2.784162745	0.01870911	0.031395314	-4.99330693	0.020830974	0.029804767	-5.068313103
F53N	53	F	N	0.029531359	0.067326476	-3.892682228	0.004346793	0.007294251	-7.099024429	0.019704503	0.028193022	-5.148518044
F53P	53	F	P	0.014065452	0.032066837	-4.962774116	0.002768269	0.004645366	-7.749991922	0.002838387	0.004061138	-7.943900293
F53Q	53	F	Q	0.016430975	0.037459828	-4.738511918	0.006982351	0.011716918	-6.415263022	0.009426479	0.01348732	-6.212252457
F53R	53	F	R	0.010716533	0.024431873	-5.355091738	0.016526746	0.027733141	-5.172245158	0.006954633	0.009950626	-6.650997033
F53S	53	F	S	0.03498846	0.079767738	-3.648050817	0.028526557	0.047869738	-4.384742267	0.002075793	0.002970026	-8.395308805
F53T	53	F	T	0.013557004	0.030907664	-5.015891554	0.007811738	0.013108692	-6.253332495	0.005169217	0.007396069	-7.079025649
F53V	53	F	V	0.045616085	0.103996914	-3.265387372	0.020290928	0.034049725	-4.876213038	0.006536605	0.009352515	-6.740429948
F53W	53	F	W	0.039284411	0.089561774	-3.480973082	0.006619408	0.011107871	-6.492273837	0.030653095	0.043858168	-4.511010654
F53Y	53	F	Y	0.052019939	0.118596612	-3.075865294	0.040798444	0.068462901	-3.868533754	0.02114995	0.030261155	-5.046389141
T54A	54	T	A	0.135431218	0.8135671	-0.297666756	0.086343918	0.27670416	-1.853583759	0.025025056	0.051564062	-4.277490271
T54C	54	T	C	0.07719786	0.463745656	-1.108594327	0.178818968	0.573056604	-0.803250447	0.029339483	0.060453925	-4.04802017
T54D	54	T	D	0.057217952	0.343721662	-1.540687321	0.024384568	0.078144604	-3.677709924	0.011348325	0.023383194	-5.418384208
T54E	54	T	E	0.006680003	0.040128348	-4.639234432	0.037373141	0.119768756	-3.061676487	0.013611342	0.028046134	-5.156054295
T54F	54	T	F	0.005405216	0.032470402	-4.944730959	0.014486539	0.046424643	-4.428965389	0.031428812	0.064758983	-3.948775867
T54G	54	T	G	0.033288164	0.199969808	-2.3221459	0.067851275	0.217441257	-2.201302393	0.008542907	0.017602638	-5.828064546
T54H	54	T	H	0.008902437	0.053479027	-4.224882961	0.009769444	0.031307889	-4.997329939	0.009721008	0.020030112	-5.641685724
T54I	54	T	I	0.022923916	0.137709338	-2.860301699	0.004554187	0.014594686	-6.098413036	0.017750053	0.036573936	-4.773040294
T54K	54	T	K	0.090942128	0.546310697	-0.872206424	0.012508958	0.04008714	-4.640716696	0.015097237	0.031107817	-5.006579025
T54L	54	T	L	0.035108717	0.210906301	-2.245325898	0.021975283	0.07042363	-3.827796592	0.017900519	0.036883972	-4.76086216
T54M	54	T	M	0.008111458	0.048727433	-4.35912196	0.021017045	0.067352791	-3.89211845	0.025436364	0.05241156	-4.253971145
T54N	54	T	N	0.04787327	0.287585964	-1.797934828	0.014100421	0.045187261	-4.467940081	0.038190919	0.078692288	-3.667633943
T54P	54	T	P	0.024802208	0.148992685	-2.746686596	0.018082711	0.057949203	-4.109067366	0.006698294	0.013801818	-6.1789979
T54Q	54	T	Q	0.055660192	0.334363831	-1.580509299	0.010264766	0.032895234	-4.925977609	0.049407829	0.1018047	-3.296123923
T54R	54	T	R	0.023666463	0.142169997	-2.814311058	0.021984816	0.070454182	-3.827170836	0.01522842	0.031378119	-4.994097323
T54S	54	T	S	0.039231029	0.235669997	-2.08515999	0.071091813	0.227826129	-2.13399488	0.156004035	0.321445898	-1.637352153
T54T	54	T	T	0.166465948	1	0	0.312044162	1	0	0.485319727	1	0
T54V	54	T	V	0.054731117	0.328782659	-1.604793888	0.027772894	0.089003089	-3.490000778	0.012773939	0.026320668	-5.247660088
T54W	54	T	W	0.075752699	0.455064232	-1.135857898	0.038506991	0.123402375	-3.018557929	0.016217332	0.033415769	-4.903327118
T54Y	54	T	Y	0.030608005	0.183869464	-2.44324619	0.007068101	0.022650963	-5.464283826	0.014958397	0.030821737	-5.019908041
E55A	55	E	A	0.051005865	0.364687445	-1.455267561	0.018944738	0.104981691	-3.251790353	0.021570215	0.063735656	-3.971755486
E55C	55	E	C	0.018553316	0.132654578	-2.914253625	0.131001543	0.725941077	-0.462075643	0.004271127	0.012620323	-6.308107308
E55D	55	E	D	NA	NA	NA	NA	NA	NA	NA	NA	NA
E55E	55	E	E	0.139861863	1	0	0.180457543	1	0	0.338432466	1	0
E55F	55	E	F	0.0682723	0.488140929	-1.034630372	0.090183699	0.499750232	-1.000720857	0.036850597	0.108886117	-3.199108078
E55G	55	E	G	0.028352039	0.202714581	-2.302478229	0.009606317	0.053233113	-4.231532247	0.011385536	0.033641972	-4.893593907
E55H	55	E	H	0.065486219	0.468220702	-1.094739373	0.028761169	0.159379148	-2.649465205	0.042885097	0.126716851	-2.980319702
E55I	55	E	I	0.042008779	0.300359071	-1.735239859	0.00518972	0.028758676	-5.119858917	0.022965671	0.067858947	-3.881317155
E55K	55	E	K	0.029099077	0.208055841	-2.264957305	0.013551936	0.075097645	-3.735088532	0.040076723	0.118418671	-3.078031527
E55L	55	E	L	0.024172923	0.172834273	-2.532538766	0.040221707	0.222887367	-2.165613245	0.009012234	0.026629343	-5.230839363
E55M	55	E	M	0.040008759	0.286059102	-1.805614845	0.090157856	0.499607026	-1.001134329	0.04505835	0.133138378	-2.909001599
E55N	55	E	N	0.109673194	0.784153676	-0.350791677	0.065530852	0.363137227	-1.46141326	0.008018521	0.023693119	-5.399388071
E55P	55	E	P	0.012678178	0.090647858	-3.463583265	0.020027091	0.110979517	-3.171634662	0.01433418	0.042354623	-4.561336737
E55Q	55	E	Q	0.067880688	0.485340943	-1.042929526	0.04800037	0.265992595	-1.910542013	0.139870446	0.413289089	-1.274776818
E55R	55	E	R	0.014523503	0.103841769	-3.267541229	0.020665494	0.114517207	-3.126363701	0.018445733	0.054503437	-4.197508988
E55S	55	E	S	0.052809239	0.377581406	-1.405140376	0.07586689	0.420414066	-1.250117154	0.058878259	0.173973436	-2.523061053
E55T	55	E	T	0.066758854	0.477319929	-1.066971523	0.056548714	0.313362985	-1.674093318	0.017757232	0.052469057	-4.252389324
E55V	55	E	V	0.063976297	0.45742489	-1.128393224	0.009963748	0.055213809	-4.178827054	0.009761373	0.028842899	-5.115640033
E55W	55	E	W	0.003394387	0.024269567	-5.364707818	0.00432581	0.023971345	-5.382545307	0.054020305	0.159619157	-2.647294288
E55Y	55	E	Y	0.052188456	0.373142865	-1.422199994	0.040037567	0.221866962	-2.172233241	0.055671626	0.164498479	-2.603853853
P56A	56	P	A	0.057900232	0.340237164	-1.555387358	0.119582997	0.519525393	-0.944733828	0.017560733	0.047001474	-4.411150176
P56C	56	P	C	0.06782986	0.398586303	-1.327035962	0.023877576	0.10373554	-3.269017841	0.027724509	0.074204919	-3.752341355
P56D	56	P	D	0.077560247	0.455764642	-1.13363909	0.051454589	0.223543197	-2.161374453	0.005598046	0.014983225	-6.060508006
P56E	56	P	E	0.02746394	0.161385416	-2.631417881	0.003272908	0.014219068	-6.136029283	0.01955521	0.052339712	-4.255950209
P56F	56	P	F	0.044066839	0.258948466	-1.949263085	0.042323619	0.183873923	-2.443211205	0.066969963	0.179245765	-2.47998906
P56G	56	P	G	0.041703878	0.245063078	-2.028774953	0.042676653	0.185407671	-2.431227164	0.203549755	0.544802919	-0.876193662
P56H	56	P	H	0.054855456	0.322345252	-1.633321362	0.010789346	0.046874049	-4.415066778	0.019758683	0.05288431	-4.241016436
P56I	56	P	I	0.033515268	0.196944629	-2.344138021	0.005833311	0.025342676	-5.302287335	0.006650343	0.01779971	-5.812002494
P56K	56	P	K	0.013860559	0.081448334	-3.617970999	0.043953884	0.19095657	-2.388683535	0.011934873	0.031943804	-4.968320063
P56L	56	P	L	0.069375978	0.407671703	-1.294520274	0.01740279	0.075605994	-3.725355571	0.002431843	0.006508853	-7.26338102
P56M	56	P	M	0.052332476	0.307519548	-1.701249972	0.090840798	0.394655617	-1.341333811	0.091117102	0.243875818	-2.035781381
P56N	56	P	N	0.067953648	0.399313714	-1.324405473	0.085076262	0.369611732	-1.435917544	0.019043154	0.05096919	-4.29423077
P56P	56	P	P	0.170176095	1	0	0.230177386	1	0	0.373620896	1	0
P56Q	56	P	Q	0.029996026	0.176264626	-2.504185121	0.022835732	0.099209277	-3.333381162	0.012353571	0.033064453	-4.918575162
P56R	56	P	R	0.026362249	0.154911588	-2.690483029	0.011983264	0.052060994	-4.263653331	0.010617619	0.028418163	-5.137042899
P56S	56	P	S	0.045457694	0.267121502	-1.904431983	0.021138052	0.091833747	-3.444831776	0.011846192	0.031706449	-4.979079859
P56T	56	P	T	0.02879807	0.169225118	-2.562984374	0.010102511	0.04389011	-4.509960302	0.009141248	0.024466641	-5.353040146
P56V	56	P	V	0.049053908	0.288253814	-1.794588396	0.03426792	0.148876139	-2.747815551	0.026353372	0.070535059	-3.825515667
P56W	56	P	W	0.02394693	0.140718534	-2.829115742	0.025845245	0.112284034	-3.154775295	0.050853413	0.136109659	-2.877158647
P56Y	56	P	Y	0.017790647	0.104542573	-3.257837523	0.106565156	0.462969703	-1.111010309	0.013319474	0.035649702	-4.809966168
V57A	57	V	A	0.031886954	0.281558358	-1.828494116	0.00364032	0.02084368	-5.584246197	0.00500285	0.018296684	-5.772274017
V57C	57	V	C	0.122912449	1.08530363	0.118098715	0.136997221	0.784416167	-0.350308825	0.00982779	0.035942709	-4.798157023
V57D	57	V	D	0.018177881	0.160508727	-2.639276355	0.028160024	0.161238146	-2.632734998	0.011678237	0.042710259	-4.549273545
V57E	57	V	E	0.005692703	0.050265948	-4.3142748	0.030905762	0.176959645	-2.498507694	0.068679445	0.251178062	-1.993217631
V57F	57	V	F	0.008550352	0.075498687	-3.727404635	0.012613019	0.072219392	-3.791469914	0.006725662	0.024597444	-5.345347755
V57G	57	V	G	0.021175158	0.186974353	-2.419087702	0.003362813	0.019254732	-5.698643174	0.029527467	0.107989399	-3.211038402
V57H	57	V	H	0.049340919	0.435674978	-1.198675837	0.00248825	0.014247178	-6.133179974	0.024241072	0.088655719	-3.495642497
V57I	57	V	I	0.016726614	0.147694195	-2.759314971	0.211684802	1.212060942	0.277462239	0.046152402	0.168790979	-2.566690293
V57K	57	V	K	0.017705345	0.15633628	-2.677275479	0.034375595	0.196827149	-2.344998865	0.019797555	0.072404656	-3.78777372
V57L	57	V	L	0.056533771	0.499187083	-1.002347491	0.040121228	0.229725386	-2.122017802	0.022122798	0.080908653	-3.627562181
V57M	57	V	M	NA	NA	NA	NA	NA	NA	NA	NA	NA
V57N	57	V	N	0.21511099	1.899406772	0.925548902	0.02599828	0.148860473	-2.747967368	0.270298049	0.988548171	-0.016616825
V57P	57	V	P	0.020696293	0.182746026	-2.45208806	0.023799883	0.136272933	-2.875429057	0.013650702	0.049924061	-4.3241209
V57Q	57	V	Q	0.023787858	0.210044217	-2.251235032	0.0140418	0.080400282	-3.636655629	0.03780491	0.138262096	-2.854522393
V57R	57	V	R	0.022362417	0.197457725	-2.340384281	0.013967441	0.079974514	-3.644315866	0.008533928	0.031210728	-5.001814165
V57S	57	V	S	0.03786219	0.334319043	-1.58070256	0.036020528	0.206245674	-2.277564237	0.029656703	0.108462046	-3.204737811
V57T	57	V	T	0.051163724	0.451770148	-1.146339153	0.129228567	0.739934548	-0.434530434	0.010516294	0.038460741	-4.700469624
V57V	57	V	V	0.113251671	1	0	0.174648646	1	0	0.273429315	1	0
V57W	57	V	W	0.004485708	0.039608317	-4.658052775	0.007624662	0.043657152	-4.517638182	0.009905369	0.036226435	-4.786813357
V57Y	57	V	Y	0.105145149	0.928420288	-0.107150046	0.024589711	0.140795312	-2.828328792	0.052022904	0.190260887	-2.393949083
K58A	58	K	A	0.069063988	0.951031012	-0.072435708	0.098769085	0.699276762	-0.516064532	0.025167309	0.066173272	-3.917607567
K58C	58	K	C	0.048866895	0.672911214	-0.571511932	0.003281648	0.023233789	-5.427631714	0.019124931	0.05028584	-4.313703983
K58D	58	K	D	0.016340219	0.225009526	-2.151942012	0.03243462	0.229634363	-2.122589549	0.003777253	0.009931661	-6.653749221
K58E	58	K	E	0.040511669	0.557857354	-0.842031827	0.062033275	0.439190331	-1.187081802	0.014877087	0.039116837	-4.676066455
K58F	58	K	F	0.030175717	0.415528312	-1.266981316	0.026983303	0.191039503	-2.38805711	0.032761127	0.086139961	-3.537173521
K58G	58	K	G	0.023490856	0.323475849	-1.628270092	0.005202915	0.036836195	-4.762732135	0.017251451	0.045359834	-4.462440841
K58H	58	K	H	0.02501018	0.344397381	-1.537853924	0.010383641	0.073515298	-3.765811693	0.042233763	0.111046687	-3.170761737
K58I	58	K	I	0.096845265	1.333587195	0.415312157	0.114835993	0.813029106	-0.298621095	0.163903378	0.430956799	-1.214384839
K58K	58	K	K	0.072620122	1	0	0.141244627	1	0	0.380324382	1	0
K58L	58	K	L	0.054736241	0.753733804	-0.407872998	0.026085135	0.18468055	-2.436896163	0.002790701	0.007337687	-7.090458892
K58M	58	K	M	0.040201732	0.553589435	-0.853111685	0.054546688	0.386185936	-1.37263247	0.053524898	0.140734859	-2.828948374
K58N	58	K	N	NA	NA	NA	NA	NA	NA	NA	NA	NA
K58P	58	K	P	0.016469322	0.226787309	-2.140588184	0.023813054	0.168594408	-2.568371411	0.006600628	0.017355259	-5.848483316
K58Q	58	K	Q	0.062171321	0.856116995	-0.224120129	0.006240898	0.044185028	-4.500298592	0.02479937	0.065205837	-3.93885508
K58R	58	K	R	0.045087888	0.620873207	-0.68762942	0.016691579	0.118174967	-3.08100363	0.008840247	0.023243965	-5.42699998
K58S	58	K	S	0.066993864	0.922524805	-0.116340392	0.02889375	0.204565301	-2.289366641	0.040305293	0.105976097	-3.2381892
K58T	58	K	T	0.085386888	1.175802043	0.23364519	0.041610633	0.294599759	-1.763171846	0.003272816	0.008605329	-6.86055394
K58V	58	K	V	0.055535561	0.764740666	-0.386957501	0.03862239	0.273443251	-1.87068664	0.016936499	0.044531721	-4.489022825
K58W	58	K	W	0.031285809	0.430814603	-1.214860944	0.051052847	0.361449836	-1.468132661	0.044502306	0.117011445	-3.095278441
K58Y	58	K	Y	0.07585694	1.04457191	0.062911813	0.162877403	1.153158222	0.205590475	0.043755725	0.115048435	-3.119686739
D59A	59	D	A	0.020582354	0.068790953	-3.861637343	0.008802465	0.019997206	-5.644057719	0.003755911	0.006347441	-7.299609132
D59C	59	D	C	0.090566487	0.302693992	-1.724068056	0.037044775	0.084157336	-3.57076715	0.041382915	0.069936589	-3.837808758
D59D	59	D	D	0.299201469	1	0	0.440184739	1	0	0.591720519	1	0
D59E	59	D	E	NA	NA	NA	NA	NA	NA	NA	NA	NA
D59F	59	D	F	0.023819373	0.079609813	-3.650909916	0.00711136	0.016155398	-5.951839925	0.014179449	0.023963085	-5.383042567
D59G	59	D	G	0.046347859	0.154905186	-2.690542647	0.056847874	0.12914549	-2.952930827	0.065891653	0.111356039	-3.166748297
D59H	59	D	H	0.064584322	0.21585563	-2.21186137	0.051307746	0.116559574	-3.100860584	0.015918693	0.026902384	-5.216122171
D59I	59	D	I	0.018055893	0.060346938	-4.050575611	0.005769919	0.01310795	-6.253414148	0.014225262	0.024040509	-5.378388769
D59K	59	D	K	0.008000919	0.026740907	-5.224807782	0.015299345	0.034756646	-4.846567339	0.012227142	0.020663712	-5.596756749
D59L	59	D	L	0.010515124	0.03514396	-4.830579444	0.004200511	0.009542609	-6.711400571	0.004037539	0.006823388	-7.195295953
D59M	59	D	M	0.053858856	0.180008663	-2.473861757	0.012436752	0.028253483	-5.145427457	0.011652372	0.019692357	-5.666220379
D59N	59	D	N	0.059728768	0.199627255	-2.324619392	0.132915836	0.301954667	-1.727596124	0.016740829	0.028291783	-5.143473086
D59P	59	D	P	0.011595551	0.038754993	-4.689474016	0.017289013	0.03927672	-4.670181729	0.006189644	0.010460417	-6.578915766
D59Q	59	D	Q	0.005012758	0.016753789	-5.899368783	0.00452105	0.010270801	-6.605307427	0.01888318	0.03191233	-4.969742264
D59R	59	D	R	0.007598515	0.025395983	-5.29925586	0.011882751	0.026994917	-5.211168392	0.021092957	0.035646824	-4.810082643
D59S	59	D	S	0.111163377	0.371533527	-1.42843569	0.06731527	0.152925042	-2.709103423	0.023745766	0.040130036	-4.639173749
D59T	59	D	T	0.018526631	0.061920254	-4.013444798	0.006239191	0.014174029	-6.140606323	0.004899102	0.008279419	-6.916254691
D59V	59	D	V	0.013377972	0.044712252	-4.483185966	0.005626048	0.012781106	-6.28984349	0.027415346	0.046331578	-4.431860363
D59W	59	D	W	0.015859023	0.053004494	-4.237741498	0.053964644	0.122595444	-3.028022727	0.028773147	0.048626245	-4.362120995
D59Y	59	D	Y	0.071943557	0.240451883	-2.05617987	0.015773468	0.035833746	-4.802537319	0.027599232	0.046642344	-4.422215903
I60A	60	I	A	0.041340314	0.136096226	-2.877301036	0.004407033	0.021287793	-5.553829781	0.002420623	0.003864915	-8.015347659
I60C	60	I	C	0.05831196	0.191968491	-2.381058561	0.112599119	0.543900333	-0.878585786	0.011335649	0.018099194	-5.787930722
I60D	60	I	D	0.002958826	0.009740734	-6.681753725	0.005528962	0.026707175	-5.226628831	0.021346729	0.034083501	-4.874782669
I60E	60	I	E	0.024288583	0.079960313	-3.644572078	0.005547825	0.026798292	-5.221715135	0.05350383	0.085427504	-3.549155551
I60F	60	I	F	0.056494241	0.185984389	-2.426746563	0.040494404	0.195604725	-2.353986873	0.05306301	0.084723664	-3.5610912
I60G	60	I	G	0.0175956	0.057926381	-4.109635655	0.005853154	0.028273157	-5.144423205	0.015514493	0.024771393	-5.335181192
I60H	60	I	H	0.019271754	0.063444438	-3.978362494	0.016144127	0.077982814	-3.68069997	0.004795062	0.00765609	-7.029176453
I60I	60	I	I	0.303757975	1	0	0.207021604	1	0	0.626306834	1	0
I60K	60	I	K	0.006003596	0.019764407	-5.66095149	0.01746097	0.08434371	-3.567575715	0.017146791	0.027377621	-5.190859102
I60L	60	I	L	0.104728453	0.34477598	-1.536268829	0.207931925	1.004397225	0.006329948	0.015695758	0.025060812	-5.318423025
I60M	60	I	M	NA	NA	NA	NA	NA	NA	NA	NA	NA
I60N	60	I	N	0.013028697	0.042891703	-4.543157595	0.120408654	0.581623616	-0.781842246	0.00982634	0.015689339	-5.994071604
I60P	60	I	P	0.052224214	0.171927054	-2.540131518	0.032156502	0.155329209	-2.686598948	0.018675782	0.029818902	-5.067629077
I60Q	60	I	Q	0.024403325	0.080338054	-3.637772677	0.019927649	0.096258789	-3.37693792	0.007130383	0.011384808	-6.456746277
I60R	60	I	R	0.016555464	0.054502156	-4.197542898	0.010554613	0.05098315	-4.29383568	0.01637509	0.026145476	-5.257294844
I60S	60	I	S	0.015597819	0.051349497	-4.283506058	0.004178204	0.020182454	-5.630754576	0.016422462	0.026221112	-5.253127305
I60T	60	I	T	0.014343284	0.047219449	-4.404474969	0.041043126	0.198255279	-2.334568814	0.008892279	0.01419796	-6.138172516
I60V	60	I	V	0.132628703	0.436626243	-1.195529251	0.088486943	0.427428543	-1.226244843	0.005312601	0.008482425	-6.881307565
I60W	60	I	W	0.008274	0.02723879	-5.198193596	0.006931265	0.033480878	-4.90051884	0.028305096	0.045193657	-4.467735902
I60Y	60	I	Y	0.04139037	0.136261015	-2.87555524	0.006685381	0.032293158	-4.952627646	0.009368124	0.014957723	-6.062965574
M61A	61	M	A	0.011599701	0.059565786	-4.069372302	0.015816454	0.046124075	-4.438336222	0.00256215	0.005465635	-7.515395225
M61C	61	M	C	0.075650018	0.388471447	-1.364119533	0.13030711	0.380002683	-1.395918489	0.063112972	0.13463396	-2.892885739
M61D	61	M	D	0.04129669	0.212063201	-2.237433799	0.006767464	0.019735334	-5.663075222	0.01528039	0.032596459	-4.939140929
M61E	61	M	E	0.082253211	0.422379594	-1.243387957	0.011666315	0.034021405	-4.877413479	0.041084603	0.087642566	-3.512224458
M61F	61	M	F	0.076580662	0.393250407	-1.346479837	0.065476265	0.190942432	-2.388790352	0.008241791	0.017581567	-5.829792497
M61G	61	M	G	0.017423071	0.08946945	-3.482461049	0.004943969	0.014417644	-6.116020767	0.007693964	0.016412931	-5.929023315
M61H	61	M	H	0.060311778	0.309707837	-1.691020204	0.024252684	0.07072588	-3.821617968	0.029010645	0.061886137	-4.014239929
M61I	61	M	I	NA	NA	NA	NA	NA	NA	NA	NA	NA
M61K	61	M	K	0.009511784	0.048844094	-4.355672056	0.023723604	0.069182973	-3.853439173	0.071846338	0.153264167	-2.705907661
M61L	61	M	L	0.112984353	0.580187504	-0.785408871	0.060533456	0.17652817	-2.502029667	0.053597077	0.114334447	-3.128667972
M61M	61	M	M	0.194737654	1	0	0.342911025	1	0	0.468774535	1	0
M61N	61	M	N	0.029117151	0.149519882	-2.74159076	0.04380891	0.127755908	-2.968538082	0.015033481	0.032069747	-4.962643197
M61P	61	M	P	0.005781675	0.029689557	-5.073900633	0.005869728	0.017117351	-5.868396725	0.003340878	0.007126834	-7.132523004
M61Q	61	M	Q	0.031672761	0.16264323	-2.620217324	0.054586025	0.159184224	-2.651230734	0.021430718	0.045716472	-4.451142104
M61R	61	M	R	0.021246517	0.10910328	-3.196233615	0.017212279	0.050194591	-4.316324272	0.036041522	0.076884555	-3.701162375
M61S	61	M	S	0.053289254	0.273646378	-1.869615333	0.009380636	0.02735589	-5.19200468	0.045313693	0.096664152	-3.370875227
M61T	61	M	T	0.041858162	0.214946422	-2.217951002	0.020470565	0.059696432	-4.066211483	0.019442599	0.041475373	-4.59160122
M61V	61	M	V	0.009060126	0.04652478	-4.42585687	0.006403421	0.018673709	-5.742847715	0.007888919	0.016828813	-5.892922761
M61W	61	M	W	0.005979177	0.030703755	-5.025441077	0.021326147	0.062191489	-4.007139026	0.020607071	0.04395945	-4.507682854
M61Y	61	M	Y	0.067313818	0.34566411	-1.532557277	0.081312223	0.237123384	-2.076290154	0.019047612	0.040632779	-4.62121215
I62A	62	I	A	0.020655735	0.175987888	-2.506451953	0.022567708	0.148987752	-2.746734357	0.00556782	0.021729269	-5.524216555
I62C	62	I	C	0.054042955	0.460448668	-1.118887766	0.031888299	0.210520544	-2.247967069	0.039664622	0.154797254	-2.691548212
I62D	62	I	D	0.090381131	0.770051745	-0.376972702	0.032448009	0.214215643	-2.222864256	0.064963499	0.253529989	-1.979771688
I62E	62	I	E	0.072969772	0.621706094	-0.685695376	0.026680249	0.176137973	-2.505222124	0.044350287	0.173083779	-2.530457572
I62F	62	I	F	0.017868751	0.152242652	-2.7155555	0.043767383	0.288944015	-1.791138108	0.012015924	0.046893981	-4.414453421
I62G	62	I	G	0.028233254	0.240548727	-2.055598928	0.013144039	0.086774466	-3.526585606	0.00168001	0.006556497	-7.252858988
I62H	62	I	H	0.086951595	0.74083192	-0.432781833	0.083758671	0.552958964	-0.854755676	0.063264962	0.246901188	-2.017994314
I62I	62	I	I	0.117370205	1	0	0.151473576	1	0	0.256235955	1	0
I62K	62	I	K	0.048286931	0.41140706	-1.281361544	0.017685761	0.116758063	-3.09840591	0.038976197	0.15211057	-2.716807687
I62L	62	I	L	0.032577348	0.277560626	-1.849125168	0.058861815	0.388594608	-1.363662214	0.003147464	0.01228346	-6.34713915
I62M	62	I	M	NA	NA	NA	NA	NA	NA	NA	NA	NA
I62N	62	I	N	0.006764462	0.057633553	-4.116947221	0.028369946	0.187293036	-2.416630835	0.020592235	0.080364347	-3.63730058
I62P	62	I	P	0.009958073	0.084843277	-3.559055844	0.008628325	0.056962576	-4.133841797	0.022096355	0.086234405	-3.535592614
I62Q	62	I	Q	0.064656288	0.550874797	-0.860203636	0.095438843	0.630069258	-0.666417674	0.195448303	0.762766893	-0.390685868
I62R	62	I	R	0.058125284	0.495230314	-1.013828468	0.021351575	0.140959077	-2.826651716	0.070948895	0.276888913	-1.852620809
I62S	62	I	S	0.05776566	0.492166304	-1.022782209	0.057728792	0.381114602	-1.391703209	0.005272481	0.020576662	-5.60284723
I62T	62	I	T	0.035200036	0.299906058	-1.737417428	0.028274432	0.186662471	-2.421496198	0.027389156	0.10689037	-3.22579621
I62V	62	I	V	0.095962955	0.81760916	-0.290516735	0.064860271	0.428195285	-1.223659186	0.016558773	0.064623144	-3.951805253
I62W	62	I	W	0.014525945	0.123761774	-3.014362315	0.064378107	0.425012128	-1.234424086	0.053411182	0.208445305	-2.262259214
I62Y	62	I	Y	0.03746481	0.319202049	-1.647458183	0.08952434	0.591022822	-0.758714256	0.00593823	0.02317485	-5.431296219
K63A	63	K	A	0.021840077	0.05437656	-4.200871307	0.010061128	0.019247981	-5.69914904	0.003010683	0.005813598	-7.42635299
K63C	63	K	C	0.013969179	0.034779909	-4.84560203	0.021062266	0.040294298	-4.633280483	0.00791152	0.015277065	-6.032488771
K63D	63	K	D	0.023907159	0.059523098	-4.070406572	0.012396072	0.02371497	-5.398058162	0.022943819	0.044304281	-4.496410085
K63E	63	K	E	0.040704249	0.101343828	-3.302669869	0.023765468	0.045465804	-4.459074327	0.029867692	0.057674208	-4.115929892
K63F	63	K	F	0.036768711	0.091545281	-3.449370663	0.045012332	0.086113257	-3.53762084	0.057885263	0.111775853	-3.161319544
K63G	63	K	G	0.026467041	0.065896592	-3.923652333	0.008661619	0.016570575	-5.915232529	0.003846881	0.007428288	-7.072754605
K63H	63	K	H	0.018565763	0.046224303	-4.435204613	0.022176474	0.042425892	-4.558911191	0.037265703	0.071959692	-3.796667174
K63I	63	K	I	0.014531137	0.036179051	-4.788701627	0.020868002	0.039922651	-4.646648664	0.036735999	0.07093684	-3.817321117
K63K	63	K	K	0.401645068	1	0	0.522710835	1	0	0.517869121	1	0
K63L	63	K	L	0.014590686	0.036327312	-4.782801578	0.039732496	0.076012384	-3.717621716	0.050344073	0.097213892	-3.362693705
K63M	63	K	M	0.02220947	0.055296261	-4.176674264	0.032148318	0.061503063	-4.023197923	0.035817173	0.069162597	-3.853864145
K63N	63	K	N	NA	NA	NA	NA	NA	NA	NA	NA	NA
K63P	63	K	P	0.029172879	0.07263348	-3.783221481	0.019796439	0.03787264	-4.722700198	0.014554525	0.02810464	-5.153047835
K63Q	63	K	Q	0.056485386	0.140635079	-2.829971601	0.031272498	0.05982753	-4.063046679	0.045864281	0.08856346	-3.497144609
K63R	63	K	R	0.047431354	0.118092708	-3.082008208	0.019159768	0.036654623	-4.769861031	0.012227586	0.023611344	-5.404376016
K63S	63	K	S	0.011336471	0.028225098	-5.146877618	0.00473143	0.009051715	-6.787593046	0.004486367	0.008663129	-6.850896131
K63T	63	K	T	0.018652164	0.04643942	-4.428506243	0.051977979	0.09943926	-3.330040627	0.031449759	0.060729164	-4.041466682
K63V	63	K	V	0.057901996	0.144162098	-2.794236181	0.026531548	0.050757601	-4.30023231	0.013130351	0.025354575	-5.301610108
K63W	63	K	W	0.053328344	0.132774801	-2.912946726	0.018827217	0.036018418	-4.795121367	0.022962343	0.044340051	-4.495245765
K63Y	63	K	Y	0.032129403	0.079994517	-3.643955066	0.022016667	0.042120167	-4.569345047	0.01153312	0.022270337	-5.488732804
S64A	64	S	A	0.015705304	0.040684624	-4.619372515	0.011010912	0.029302846	-5.092815406	0.00857598	0.014248264	-6.13307
S64C	64	S	C	0.01175019	0.030438893	-5.037940299	0.00426961	0.011362522	-6.459573116	0.023382878	0.038848671	-4.685990952
S64D	64	S	D	0.018054985	0.046771478	-4.418227166	0.0055685	0.0148192	-6.076388591	0.029044913	0.048255662	-4.373157959
S64E	64	S	E	0.034132247	0.088419659	-3.499489015	0.004281341	0.011393742	-6.455614528	0.015111669	0.025106758	-5.315780441
S64F	64	S	F	0.022459326	0.058180932	-4.103309789	0.016912839	0.045009379	-4.473630531	0.014129272	0.023474589	-5.412756304
S64G	64	S	G	0.027954192	0.072415395	-3.787559763	0.010703889	0.02848578	-5.133614288	0.007024724	0.011670984	-6.42093004
S64H	64	S	H	0.015252166	0.03951077	-4.661610244	0.019092794	0.050810798	-4.298721076	0.013957847	0.023189781	-5.430366981
S64I	64	S	I	0.005931076	0.015364466	-6.024258537	0.065249666	0.173646011	-2.525778827	0.090364895	0.150133617	-2.73568104
S64K	64	S	K	0.066003591	0.170982444	-2.54807989	0.014660265	0.039014706	-4.679838159	0.007672553	0.012747297	-6.293664864
S64L	64	S	L	0.007637138	0.019784022	-5.659520411	0.016280499	0.043326563	-4.528604386	0.004465367	0.007418829	-7.074592768
S64M	64	S	M	0.025336985	0.065635514	-3.929379561	0.01128132	0.030022471	-5.057813472	0.017786025	0.029549974	-5.080699339
S64N	64	S	N	0.018284946	0.047367192	-4.399968026	0.010975022	0.029207333	-5.09752556	0.015013185	0.024943135	-5.325213384
S64P	64	S	P	0.019667976	0.050949933	-4.294775939	0.006285373	0.016726981	-5.901679128	0.005630686	0.009354908	-6.740060825
S64Q	64	S	Q	0.02919442	0.075628209	-3.724931742	0.0202734	0.053952692	-4.212161255	0.014841297	0.024657558	-5.341826239
S64R	64	S	R	0.022026933	0.057060817	-4.131355784	0.012183607	0.032423688	-4.946807987	0.003971989	0.006599123	-7.243509877
S64S	64	S	S	0.386025543	1	0	0.375762539	1	0	0.601896472	1	0
S64T	64	S	T	0.208048319	0.538949619	-0.891777679	0.318101856	0.846550209	-0.240332459	0.089888441	0.149342029	-2.743307855
S64V	64	S	V	0.010701797	0.027723027	-5.172771396	0.033927652	0.09029014	-3.469287745	0.006000138	0.009968721	-6.64837591
S64W	64	S	W	0.028367232	0.073485375	-3.766399039	0.022707836	0.060431347	-4.048559096	0.028066528	0.046630159	-4.422592834
S64Y	64	S	Y	0.027465634	0.071149785	-3.812996791	0.020471078	0.054478763	-4.198162248	0.003175141	0.005275227	-7.566551
L65A	65	L	A	0.074917535	0.752803933	-0.409653929	0.071492456	0.902261123	-0.148383071	0.033728918	0.158227988	-2.65992328
L65C	65	L	C	0.100626237	1.01113613	0.015977242	0.095243668	1.202010171	0.265449104	0.038065073	0.178569615	-2.485441479
L65D	65	L	D	0.050233376	0.504766782	-0.986311122	0.067052513	0.846227406	-0.240882684	0.124050661	0.581942373	-0.781051799
L65E	65	L	E	0.072757697	0.731100941	-0.451857486	0.055197007	0.69660655	-0.521584057	0.013003954	0.061003721	-4.034958947
L65F	65	L	F	0.011460678	0.115161875	-3.118264916	0.009322525	0.117653697	-3.087381445	0.005816926	0.027288169	-5.195580581
L65G	65	L	G	0.025807599	0.259325959	-1.947161468	0.029559597	0.373053005	-1.422547465	0.030629023	0.143685861	-2.799009988
L65H	65	L	H	0.051408685	0.51657679	-0.95294527	0.048584335	0.613152197	-0.70568287	0.166672966	0.781890726	-0.354961098
L65I	65	L	I	0.012314446	0.1237409	-3.014605668	0.004335656	0.054717581	-4.191851729	0.001708192	0.008013414	-6.963367344
L65K	65	L	K	0.052565501	0.528200982	-0.92084111	0.016766642	0.2116012	-2.240580283	0.060698764	0.28474804	-1.812242183
L65L	65	L	L	0.099517992	1	0	0.07923699	1	0	0.213166573	1	0
L65M	65	L	M	0.089271933	0.89704315	-0.156750711	0.284101297	3.585462995	1.842159428	0.045610796	0.213967861	-2.224533984
L65N	65	L	N	0.003967384	0.039866002	-4.648697264	0.000792909	0.010006808	-6.642874317	0.004710312	0.022096859	-5.500014908
L65P	65	L	P	0.003111924	0.031269964	-4.999078637	0.00175576	0.022158341	-5.496006289	0.000632957	0.002969309	-8.395657112
L65Q	65	L	Q	0.088188255	0.886153888	-0.174370839	0.05058793	0.638438301	-0.64738089	0.013160637	0.061738748	-4.017679968
L65R	65	L	R	0.039896231	0.400894653	-1.318704919	0.022755699	0.287185305	-1.799946168	0.060059494	0.281749119	-1.827516994
L65S	65	L	S	0.04119203	0.413915407	-1.272592146	0.046492438	0.586751688	-0.769178009	0.073719359	0.345829826	-1.531865795
L65T	65	L	T	0.047139466	0.473677823	-1.078021965	0.020171893	0.254576721	-1.973827592	0.079232412	0.371692481	-1.427818591
L65V	65	L	V	0.028786674	0.289261003	-1.789556259	0.007583589	0.095707692	-3.385221315	0.009254786	0.043415748	-4.525637763
L65W	65	L	W	0.007879305	0.079174675	-3.658817153	0.00220803	0.027866148	-5.165342614	0.00326713	0.01532665	-6.027813764
L65Y	65	L	Y	0.098957053	0.994363446	-0.008154832	0.086759064	1.094931339	0.130840404	0.022811069	0.107010534	-3.224175274
P66A	66	P	A	0.073433651	0.227403992	-2.136670515	0.030510676	0.075647002	-3.724573292	0.044476468	0.087471623	-3.515041134
P66C	66	P	C	0.024803739	0.076810417	-3.702554211	0.044200732	0.109589601	-3.189817194	0.00980877	0.019290852	-5.695939303
P66D	66	P	D	0.020667331	0.064001087	-3.965759783	0.013259468	0.032875016	-4.926864575	0.029052011	0.057136428	-4.129445337
P66E	66	P	E	0.033917539	0.105033369	-3.251080355	0.014085842	0.034923897	-4.839641647	0.008837731	0.017381116	-5.846335469
P66F	66	P	F	0.041773221	0.129360273	-2.950533461	0.017931394	0.044458411	-4.491399799	0.028533896	0.056117454	-4.155406641
P66G	66	P	G	0.011482753	0.035558955	-4.81364328	0.004480717	0.011109318	-6.492085991	0.012311243	0.024212453	-5.36810696
P66H	66	P	H	0.004213427	0.013047835	-6.260045702	0.006058413	0.015020997	-6.056875655	0.009526414	0.018735545	-5.738078266
P66I	66	P	I	0.053387674	0.165327069	-2.596605136	0.0259425	0.06432084	-3.95856994	0.014258566	0.028042243	-5.15625443
P66K	66	P	K	0.040214058	0.124531971	-3.005411926	0.091067463	0.225789178	-2.146951757	0.013174524	0.025910263	-5.27033252
P66L	66	P	L	0.035848812	0.111013996	-3.171186516	0.063110447	0.156473623	-2.676008616	0.064224484	0.126309934	-2.984959985
P66M	66	P	M	0.073620363	0.22798219	-2.133006973	0.035296607	0.087513054	-3.514357956	0.03149688	0.061944739	-4.012874437
P66N	66	P	N	0.041653676	0.128990075	-2.954668033	0.041605841	0.103155928	-3.277101369	0.013556751	0.026661986	-5.229071951
P66P	66	P	P	0.322921555	1	0	0.403329619	1	0	0.508467399	1	0
P66Q	66	P	Q	0.026262972	0.081329262	-3.620081664	0.057128114	0.141641256	-2.819686548	0.013037022	0.025639839	-5.285468999
P66R	66	P	R	0.053201646	0.16475099	-2.60164096	0.03177861	0.078790667	-3.665831444	0.026035606	0.051204081	-4.287597395
P66S	66	P	S	0.038228887	0.118384439	-3.07844863	0.01939967	0.048098798	-4.377855336	0.067785153	0.133312682	-2.907114066
P66T	66	P	T	0.037315222	0.115555067	-3.113347577	0.018995982	0.047097909	-4.408193175	0.021169371	0.041633683	-4.586104997
P66V	66	P	V	0.035989584	0.111449929	-3.165532401	0.033789631	0.083776716	-3.577306863	0.010535477	0.020720063	-5.592827784
P66W	66	P	W	0.009535856	0.029529946	-5.081677466	0.015878859	0.039369436	-4.666780162	0.01257203	0.024725341	-5.337865746
P66Y	66	P	Y	0.021528035	0.066666454	-3.906895208	0.032149417	0.079710032	-3.649094878	0.061140206	0.120244103	-3.055961953
A67A	67	A	A	0.192058519	1	0	0.392040249	1	0	0.460862941	1	0
A67C	67	A	C	0.031541344	0.164227781	-2.606229899	0.01079701	0.027540564	-5.182298074	0.007115578	0.015439685	-6.017212907
A67D	67	A	D	0.047417474	0.246890763	-2.018055234	0.007483259	0.019087986	-5.711191325	0.039346443	0.085375586	-3.550032621
A67E	67	A	E	0.047761039	0.248679617	-2.007639833	0.016858388	0.043001677	-4.539463278	0.009376331	0.020345161	-5.619170491
A67F	67	A	F	0.023185421	0.120720609	-3.050256104	0.020610665	0.052572828	-4.249538834	0.008626822	0.018718846	-5.739364707
A67G	67	A	G	0.033940687	0.17672055	-2.50045828	0.043147535	0.110058943	-3.183651716	0.037635755	0.081663662	-3.614161928
A67H	67	A	H	0.04049495	0.210846937	-2.245732033	0.033652358	0.085839039	-3.542222267	0.022936176	0.04976789	-4.328640975
A67I	67	A	I	0.027385871	0.142591285	-2.810042285	0.018778448	0.047899287	-4.383852008	0.01223826	0.026555096	-5.234867419
A67K	67	A	K	0.008736801	0.045490309	-4.458296965	0.028994852	0.073958866	-3.757133093	0.015970465	0.034653393	-4.850859573
A67L	67	A	L	0.027536461	0.14337537	-2.802130889	0.01415103	0.036095861	-4.792022772	0.016027693	0.03477757	-4.845699051
A67M	67	A	M	0.013912398	0.072438325	-3.787102994	0.01516603	0.038684879	-4.692086422	0.06975042	0.151347425	-2.724063962
A67N	67	A	N	0.202986997	1.056901813	0.079841355	0.061209987	0.156131895	-2.679162806	0.065293708	0.141677064	-2.819321878
A67P	67	A	P	0.033852813	0.176263012	-2.504198327	0.056411854	0.143893017	-2.796931511	0.017379013	0.037709722	-4.728919693
A67Q	67	A	Q	0.070598328	0.367587587	-1.443840046	0.127545001	0.325336495	-1.619995426	0.031074446	0.067426653	-3.890537207
A67R	67	A	R	0.007009826	0.036498385	-4.776023543	0.006629262	0.016909646	-5.886009704	0.005186064	0.011252943	-6.473553877
A67S	67	A	S	0.092997929	0.48421663	-1.046275466	0.030543794	0.077909842	-3.682050604	0.033169796	0.071973234	-3.796395706
A67T	67	A	T	0.049404602	0.257237232	-1.958828623	0.058249857	0.148581319	-2.750675356	0.07225749	0.156787373	-2.673118723
A67V	67	A	V	0.013510905	0.070347854	-3.829349782	0.004402914	0.011230771	-6.476399247	0.022028324	0.047797994	-4.386906111
A67W	67	A	W	0.013019268	0.067788026	-3.882825732	0.009267422	0.023638955	-5.402689935	0.014879656	0.03228651	-4.952924708
A67Y	67	A	Y	0.022648367	0.117924303	-3.084067026	0.044060084	0.112386633	-3.153457638	0.038844619	0.084286705	-3.568551109
L68A	68	L	A	0.010000773	0.023172459	-5.431445026	0.043228977	0.096262761	-3.376878392	0.009029883	0.015100803	-6.049230938
L68C	68	L	C	0.039301002	0.091063049	-3.45699042	0.012983384	0.028911542	-5.112210609	0.009878663	0.01652023	-5.919622433
L68D	68	L	D	0.009010383	0.020877659	-5.581896215	0.03913736	0.087151502	-3.520330657	0.007934261	0.013268579	-6.235842299
L68E	68	L	E	0.004627836	0.010723007	-6.543146713	0.035810363	0.079742909	-3.648499956	0.010565476	0.017668797	-5.822652355
L68F	68	L	F	0.015692503	0.036360579	-4.781481037	0.041336468	0.0920485	-3.441461978	0.046843231	0.078336609	-3.674169518
L68G	68	L	G	0.004904446	0.01136393	-6.459394353	0.006295408	0.014018684	-6.156505254	0.00300297	0.00502191	-7.637548121
L68H	68	L	H	0.02331745	0.054028092	-4.210146456	0.015225901	0.033905202	-4.882349533	0.009605496	0.016063409	-5.960078053
L68I	68	L	I	0.131888067	0.305593474	-1.710314362	0.074952207	0.166904396	-2.582906141	0.16445938	0.275027784	-1.862350726
L68K	68	L	K	0.015873114	0.036779068	-4.764971269	0.013170045	0.0293272	-5.091616854	0.009510864	0.015905155	-5.974361757
L68L	68	L	L	0.431580118	1	0	0.449072696	1	0	0.597973695	1	0
L68M	68	L	M	0.048908967	0.113325348	-3.141457507	0.054095887	0.120461313	-3.053358201	0.010935085	0.0182869	-5.773045646
L68N	68	L	N	0.017184546	0.039817742	-4.650444779	0.023932856	0.053293946	-4.229884527	0.006216218	0.010395471	-6.587901119
L68P	68	L	P	0.027954576	0.064772623	-3.94847203	0.00429748	0.009569675	-6.707314347	0.016717829	0.027957465	-5.160622626
L68Q	68	L	Q	0.024235579	0.056155457	-4.154429952	0.019146972	0.042636687	-4.551760852	0.007908291	0.013225148	-6.240572287
L68R	68	L	R	0.015146109	0.035094547	-4.832609313	0.009400675	0.020933527	-5.578040812	0.015976519	0.026717763	-5.226056992
L68S	68	L	S	0.0212327	0.049197585	-4.345268689	0.016030162	0.03569614	-4.808088125	0.005509032	0.009212833	-6.762139439
L68T	68	L	T	0.034582363	0.080129649	-3.641520034	0.012672154	0.028218491	-5.147215368	0.00655945	0.010969462	-6.510363463
L68V	68	L	V	0.103109773	0.238912241	-2.065447319	0.083634598	0.186238439	-2.424777221	0.032854618	0.05494325	-4.185913951
L68W	68	L	W	0.00401185	0.009295726	-6.749216797	0.022997092	0.051210178	-4.287425628	0.012122097	0.020271957	-5.624370851
L68Y	68	L	Y	0.017437844	0.040404652	-4.629334798	0.022579315	0.050279866	-4.313875379	0.016396942	0.027420842	-5.188583295
N69A	69	N	A	0.081673751	0.287459392	-1.798569925	0.083646224	0.248953692	-2.006050686	0.237397898	0.539562355	-0.890138398
N69C	69	N	C	0.064726838	0.227812942	-2.134078386	0.093381318	0.277927953	-1.84721715	0.011467822	0.02606428	-5.261782177
N69D	69	N	D	0.007561734	0.02661432	-5.231653459	0.018178249	0.054103366	-4.208137824	0.008968701	0.020384231	-5.61640264
N69E	69	N	E	0.010597325	0.037298405	-4.744742242	0.016602705	0.049414121	-4.338932818	0.015260545	0.03468445	-4.84956719
N69F	69	N	F	0.015206644	0.053521388	-4.223740656	0.011904433	0.035430798	-4.818852229	0.016086938	0.036562692	-4.773483879
N69G	69	N	G	0.017398187	0.061234757	-4.029505432	0.012526349	0.03728179	-4.745385071	0.008318839	0.018907212	-5.724919538
N69H	69	N	H	0.018181291	0.063990972	-3.965987803	0.021980462	0.065419775	-3.934129386	0.027629828	0.062797586	-3.993147087
N69I	69	N	I	0.008126602	0.028602432	-5.127718349	0.024109615	0.071756707	-3.800742502	0.015213333	0.034577147	-4.854037373
N69K	69	N	K	NA	NA	NA	NA	NA	NA	NA	NA	NA
N69L	69	N	L	0.014633438	0.051503931	-4.279173639	0.011829391	0.035207452	-4.827975356	0.002268934	0.005156875	-7.599287174
N69M	69	N	M	0.008900167	0.031325078	-4.996538087	0.051492993	0.153257017	-2.705974964	0.023598862	0.053635932	-4.220656375
N69N	69	N	N	0.284122743	1	0	0.335991098	1	0	0.439982322	1	0
N69P	69	N	P	0.012719752	0.044768511	-4.481371863	0.007690695	0.02288958	-5.449165225	0.000892107	0.002027598	-8.946012326
N69Q	69	N	Q	0.204073399	0.71825788	-0.477426179	0.134241958	0.399540222	-1.323587346	0.007794904	0.017716402	-5.818770526
N69R	69	N	R	0.014317244	0.050391053	-4.310688574	0.008123267	0.02417703	-5.370219183	0.010730033	0.024387418	-5.357719146
N69S	69	N	S	0.057755639	0.203277072	-2.298480593	0.039244637	0.11680261	-3.097855577	0.027991113	0.063618722	-3.974404796
N69T	69	N	T	0.036621045	0.128891634	-2.955769468	0.030346531	0.09031945	-3.468819495	0.01874034	0.042593392	-4.553226548
N69V	69	N	V	0.01252172	0.044071516	-4.504009652	0.007381048	0.021967986	-5.508453547	0.019346039	0.043970037	-4.507335454
N69W	69	N	W	0.009109504	0.032061862	-4.962997999	0.022845806	0.067995272	-3.878421759	0.015966686	0.036289382	-4.784308709
N69Y	69	N	Y	0.065413697	0.230230413	-2.118849669	0.018238971	0.054284089	-4.203326801	0.030878179	0.070180498	-3.832785997
S70A	70	S	A	0.01465005	0.025085694	-5.316991327	0.015509631	0.025922963	-5.269625548	0.005667647	0.008287796	-6.914795853
S70C	70	S	C	0.048568764	0.083165666	-3.587868141	0.087921461	0.146952876	-2.766574503	0.03252739	0.047564775	-4.393962637
S70D	70	S	D	0.046289905	0.07926351	-3.657199329	0.02568559	0.042931171	-4.541830671	0.007487502	0.010948967	-6.513061412
S70E	70	S	E	0.030244399	0.051788337	-4.271228952	0.020719051	0.034630045	-4.851831925	0.017415215	0.025466254	-5.295269425
S70F	70	S	F	0.019573989	0.033517093	-4.898959163	0.013009393	0.021744039	-5.523236211	0.024612169	0.035990353	-4.79624592
S70G	70	S	G	0.015824898	0.027097419	-5.205700736	0.010779711	0.018017324	-5.794471397	0.010753123	0.015724282	-5.990862011
S70H	70	S	H	0.022110456	0.037860358	-4.723168155	0.012445623	0.020801748	-5.587151413	0.008384461	0.012260589	-6.34982785
S70I	70	S	I	0.009157236	0.015680193	-5.994912853	0.015593817	0.026063673	-5.261815796	0.021360715	0.031235756	-5.000657755
S70K	70	S	K	0.014456708	0.024754629	-5.336157878	0.016318199	0.027274412	-5.196308069	0.010460442	0.015296296	-6.030673853
S70L	70	S	L	0.02175429	0.037250484	-4.746597014	0.011051719	0.018471962	-5.758519097	0.01747844	0.025558708	-5.290041254
S70M	70	S	M	0.016627274	0.028471351	-5.13434525	0.021042879	0.035171294	-4.829457758	0.021549599	0.03151196	-4.98795668
S70N	70	S	N	0.029885938	0.051174536	-4.288430079	0.034608109	0.057844365	-4.111679771	0.016919217	0.024740957	-5.336954907
S70P	70	S	P	0.011160582	0.01911058	-5.709484646	0.01704134	0.02848308	-5.133751054	0.004873237	0.00712613	-7.132665496
S70Q	70	S	Q	0.009780445	0.016747332	-5.899924941	0.007855477	0.013129729	-6.251019098	0.006684998	0.009775467	-6.67661868
S70R	70	S	R	0.017649178	0.030221186	-5.048295918	0.005989832	0.010011469	-6.642202533	0.00318086	0.004651368	-7.74812911
S70S	70	S	S	0.584000186	1	0	0.598296977	1	0	0.683854604	1	0
S70T	70	S	T	0.040212714	0.068857365	-3.860245207	0.007803114	0.013042209	-6.26066793	0.011437777	0.016725451	-5.901811048
S70V	70	S	V	0.008404624	0.014391475	-6.118641735	0.017598731	0.029414708	-5.087318471	0.011178933	0.016346944	-5.93483521
S70W	70	S	W	0.026829673	0.045941206	-4.444067458	0.04407989	0.073675601	-3.76266926	0.049891909	0.072956896	-3.776811835
S70Y	70	S	Y	0.012818692	0.021949808	-5.509647901	0.016649459	0.027828084	-5.167314607	0.034281761	0.05013019	-4.318176479
P71A	71	P	A	0.016159744	0.026685077	-5.227823037	0.02785275	0.043545168	-4.521343549	0.014884055	0.02392333	-5.385437945
P71C	71	P	C	0.020236503	0.033417154	-4.903267317	0.022184	0.034682608	-4.849643808	0.049417262	0.079428995	-3.654190449
P71D	71	P	D	0.011976138	0.019776562	-5.660064546	0.05506053	0.086081985	-3.53814484	0.0169904	0.027308887	-5.194485692
P71E	71	P	E	0.065396099	0.107990569	-3.211022769	0.025008	0.039097667	-4.676773668	0.009485894	0.015246799	-6.035349818
P71F	71	P	F	0.029570305	0.048830346	-4.356078202	0.021098868	0.032986105	-4.921997746	0.039839661	0.064034794	-3.965000166
P71G	71	P	G	0.013239295	0.021862451	-5.515401024	0.006803566	0.010636738	-6.55480043	0.008660757	0.013920544	-6.166640577
P71H	71	P	H	0.030446693	0.050277551	-4.313941799	0.009977519	0.015598917	-6.002410356	0.007083599	0.011385559	-6.456651072
P71I	71	P	I	0.009215379	0.015217636	-6.038111911	0.008943172	0.013981812	-6.160304829	0.013578689	0.0218252	-5.517861297
P71K	71	P	K	0.006901404	0.011396499	-6.455265468	0.017851142	0.02790859	-5.163146954	0.020354201	0.032715566	-4.933878963
P71L	71	P	L	0.017256733	0.028496568	-5.133068018	0.016986135	0.026556232	-5.234805703	0.013969541	0.022453421	-5.476920933
P71M	71	P	M	0.027817491	0.045935869	-4.444235063	0.022512826	0.035196697	-4.828416154	0.044189794	0.071026818	-3.815492345
P71N	71	P	N	0.003833509	0.006330391	-7.303489708	0.005962327	0.00932154	-6.745215927	0.006366599	0.010233115	-6.610610805
P71P	71	P	P	0.605572313	1	0	0.639628958	1	0	0.622156464	1	0
P71Q	71	P	Q	0.016395365	0.027074165	-5.206939336	0.025899502	0.040491447	-4.626238988	0.007087995	0.011392625	-6.455756035
P71R	71	P	R	0.02758508	0.045552083	-4.456339152	0.010621314	0.01660543	-5.912201137	0.019040746	0.030604433	-5.030115527
P71S	71	P	S	0.020400075	0.033687265	-4.891652885	0.015207009	0.023774735	-5.394426934	0.030403243	0.04886752	-4.354980308
P71T	71	P	T	0.021535339	0.035561961	-4.813521326	0.009617082	0.015035408	-6.055492192	0.012642921	0.020321128	-5.620875735
P71V	71	P	V	0.021517237	0.035532069	-4.814734501	0.018856811	0.029480859	-5.084077617	0.018002828	0.028936174	-5.11098201
P71W	71	P	W	0.0120044	0.01982323	-5.656664103	0.02328417	0.036402621	-4.779813872	0.016343925	0.026269799	-5.250451055
P71Y	71	P	Y	0.022940897	0.037883002	-4.722305522	0.016644317	0.026021831	-5.264133692	0.029501425	0.047418017	-4.398420873
T72A	72	T	A	0.015269729	0.046378662	-4.430394975	0.007937862	0.03018841	-5.049861401	0.005052872	0.010591956	-6.560887187
T72C	72	T	C	0.071705043	0.217789328	-2.198994832	0.019010977	0.072300469	-3.789851184	0.061264242	0.128423637	-2.961017336
T72D	72	T	D	0.025551492	0.077607405	-3.687661883	0.021924787	0.083381953	-3.584121034	0.008325449	0.017452014	-5.840462672
T72E	72	T	E	0.028879337	0.08771505	-3.511031786	0.004641535	0.017652179	-5.82400987	0.026749624	0.056073231	-4.156543984
T72F	72	T	F	0.017239399	0.05236113	-4.255359954	0.007632698	0.029027841	-5.106418904	0.008563765	0.017951578	-5.799745561
T72G	72	T	G	0.045654287	0.138665513	-2.850319065	0.00692789	0.026347394	-5.246195912	0.011320236	0.023729761	-5.39715859
T72H	72	T	H	0.008973266	0.027254451	-5.197364325	0.004152088	0.015790767	-5.984774971	0.011713179	0.024553459	-5.347929884
T72I	72	T	I	0.008032409	0.024396791	-5.357164786	0.0081679	0.031063265	-5.008646728	0.014301469	0.029979097	-5.059899262
T72K	72	T	K	0.028145522	0.085486237	-3.548164027	0.033340785	0.126798027	-2.979395796	0.035661787	0.074755129	-3.741683627
T72L	72	T	L	0.018498809	0.05618633	-4.153637016	0.008905587	0.033868753	-4.883901319	0.003738693	0.007837141	-6.995456857
T72M	72	T	M	0.017143181	0.05206889	-4.263434549	0.018023446	0.068544798	-3.866808999	0.032986103	0.069146294	-3.854204266
T72N	72	T	N	0.108890819	0.330733479	-1.596259004	0.451506121	1.717118719	0.779989789	0.028505194	0.0597533	-4.064837803
T72P	72	T	P	0.00894458	0.027167323	-5.201983775	0.0079314	0.030163832	-5.051036488	0.002694511	0.005648301	-7.467967379
T72Q	72	T	Q	0.027763489	0.084325891	-3.56788054	0.009024758	0.034321973	-4.864723705	0.005805975	0.01217063	-6.360452304
T72R	72	T	R	0.022283329	0.06768103	-3.885104659	0.022813786	0.086762897	-3.526777968	0.006614839	0.01386619	-6.172284741
T72S	72	T	S	0.144594429	0.439175856	-1.187129353	0.031533651	0.119925335	-3.059791625	0.198117066	0.415297948	-1.267781353
T72T	72	T	T	0.329240387	1	0	0.262944033	1	0	0.477048026	1	0
T72V	72	T	V	0.044403354	0.13486606	-2.89040076	0.008609435	0.032742464	-4.932693315	0.01316443	0.027595606	-5.179417597
T72W	72	T	W	0.012687355	0.038535232	-4.697678096	0.015204834	0.057825363	-4.112153777	0.040520589	0.084940271	-3.557407472
T72Y	72	T	Y	0.016099786	0.048899791	-4.354027898	0.049766428	0.189266236	-2.401511027	0.007851954	0.016459462	-5.924938994
V73A	73	V	A	0.046124447	0.11292171	-3.14660521	0.02150861	0.052724408	-4.245385205	0.018516943	0.042496372	-4.556516503
V73C	73	V	C	0.026851549	0.06573787	-3.927131482	0.046398665	0.113737809	-3.136216173	0.05305283	0.12175621	-3.037932738
V73D	73	V	D	0.071602576	0.175297178	-2.512125327	0.014370946	0.035227736	-4.827144415	0.018528121	0.042522024	-4.555645904
V73E	73	V	E	0.036477425	0.089303906	-3.485132916	0.030943526	0.075852373	-3.72066188	0.050060165	0.114888045	-3.121699415
V73F	73	V	F	0.018769871	0.045952332	-4.443718103	0.020898375	0.05122853	-4.28690869	0.035598019	0.08169743	-3.613565495
V73G	73	V	G	0.017192613	0.042090895	-4.570348014	0.021463941	0.052614911	-4.248384473	0.017875484	0.041024223	-4.607380168
V73H	73	V	H	0.027475621	0.06726572	-3.893984718	0.038004878	0.093161981	-3.424114879	0.009384011	0.0215363	-5.537085803
V73I	73	V	I	0.052446429	0.128399165	-2.961292273	0.038728322	0.094935373	-3.396910458	0.026353017	0.060480157	-4.047394302
V73K	73	V	K	0.017310745	0.042380106	-4.560468999	0.012828766	0.031447365	-4.990917062	0.045669121	0.104810603	-3.254143429
V73L	73	V	L	0.015260466	0.037360621	-4.742337747	0.025193367	0.061756915	-4.017255505	0.009880799	0.022676428	-5.4626628
V73M	73	V	M	0.047235515	0.115641823	-3.112264832	0.045703224	0.112033063	-3.158003533	0.045817596	0.105151353	-3.249460688
V73N	73	V	N	0.017514103	0.042877967	-4.543619678	0.006825106	0.016730495	-5.901376026	0.054155186	0.124286116	-3.008262953
V73P	73	V	P	0.02359404	0.057762846	-4.113714362	0.077333205	0.189568156	-2.399211459	0.011634373	0.026700879	-5.226968979
V73Q	73	V	Q	0.049406751	0.120957436	-3.047428629	0.035130577	0.086116159	-3.537572209	0.057433519	0.131809889	-2.923469483
V73R	73	V	R	0.030003002	0.073453245	-3.767029956	0.016951045	0.041552376	-4.588925216	0.018486781	0.042427151	-4.558868373
V73S	73	V	S	0.026340043	0.064485601	-3.954879136	0.020637136	0.050588151	-4.305056674	0.021096973	0.048417538	-4.368326458
V73T	73	V	T	0.01159679	0.028391222	-5.13841124	0.019982908	0.048984432	-4.351532888	0.023880957	0.05480678	-4.18950182
V73V	73	V	V	0.408463939	1	0	0.407944071	1	0	0.435729972	1	0
V73W	73	V	W	0.047580697	0.116486897	-3.101760415	0.064877763	0.159035925	-2.652575397	0.037337763	0.085690142	-3.544726951
V73Y	73	V	Y	0.008753381	0.021429996	-5.544224583	0.034275569	0.084020264	-3.573118865	0.009508371	0.021821705	-5.518092339
E74A	74	E	A	0.05991719	0.501944773	-0.994399456	0.03350204	0.143838917	-2.797474031	0.053385633	0.143585386	-2.800019177
E74C	74	E	C	0.042310681	0.354449617	-1.496347525	0.018234465	0.078288536	-3.675055117	0.015435234	0.041514429	-4.590243343
E74D	74	E	D	NA	NA	NA	NA	NA	NA	NA	NA	NA
E74E	74	E	E	0.119370085	1	0	0.232913601	1	0	0.371804085	1	0
E74F	74	E	F	0.012860814	0.107739	-3.214387517	0.017106239	0.073444568	-3.767200398	0.051674498	0.138983138	-2.847018236
E74G	74	E	G	0.040260039	0.337270753	-1.568020875	0.012946459	0.055584811	-4.169165469	0.012385592	0.033312147	-4.907807841
E74H	74	E	H	0.064193837	0.537771563	-0.894934625	0.054834209	0.235427253	-2.08664676	0.010613384	0.028545636	-5.130585996
E74I	74	E	I	0.030475515	0.255302785	-1.969718821	0.048808707	0.209557134	-2.254584459	0.008816928	0.023713909	-5.398122691
E74K	74	E	K	0.131149129	1.09867668	0.135766891	0.006869424	0.029493443	-5.083461964	0.010918786	0.029367041	-5.089658302
E74L	74	E	L	0.040611273	0.340213152	-1.555489183	0.049734784	0.213533191	-2.227467762	0.04713611	0.126776741	-2.979638005
E74M	74	E	M	0.078568209	0.658190107	-0.603423752	0.038852101	0.166809069	-2.583730364	0.025815262	0.069432431	-3.848246502
E74N	74	E	N	0.044286377	0.371000628	-1.430506464	0.024924806	0.107013099	-3.224140687	0.025870224	0.069580257	-3.84517818
E74P	74	E	P	0.026119078	0.218807568	-2.192265458	0.030420538	0.13060868	-2.936677315	0.031063327	0.083547567	-3.581258371
E74Q	74	E	Q	0.038803322	0.325067386	-1.621189276	0.126678919	0.543888028	-0.878618426	0.076073936	0.204607585	-2.28906847
E74R	74	E	R	0.040482638	0.33913554	-1.560066112	0.075327199	0.323412626	-1.628552092	0.062471273	0.168022018	-2.573277792
E74S	74	E	S	0.06164816	0.516445638	-0.953311599	0.059121063	0.253832594	-1.978050763	0.019988392	0.05376055	-4.217308289
E74T	74	E	T	0.063031222	0.528031973	-0.921302807	0.057699735	0.247730209	-2.013158286	0.064807901	0.174306587	-2.520301007
E74V	74	E	V	0.030181626	0.252840781	-1.983698917	0.042599946	0.182900208	-2.450871376	0.036434941	0.097995	-3.351148045
E74W	74	E	W	0.010203727	0.085479764	-3.548273263	0.014935264	0.064123623	-3.963000248	0.014407516	0.03875029	-4.689649093
E74Y	74	E	Y	0.017491516	0.14653182	-2.770714108	0.006119265	0.02627268	-5.250292806	0.005156604	0.013869144	-6.171977473
E75A	75	E	A	0.043026318	0.111280511	-3.167727139	0.147966658	0.406458881	-1.298818685	0.033328146	0.060936542	-4.036548551
E75C	75	E	C	0.027574784	0.071317656	-3.809596908	0.017257031	0.047404419	-4.398834634	0.009811043	0.017938324	-5.800811116
E75D	75	E	D	NA	NA	NA	NA	NA	NA	NA	NA	NA
E75E	75	E	E	0.386647374	1	0	0.364038442	1	0	0.546932014	1	0
E75F	75	E	F	0.048316275	0.124962118	-3.000437285	0.047292147	0.129909762	-2.944418248	0.058562583	0.107074703	-3.223310423
E75G	75	E	G	0.011233332	0.029053171	-5.105160547	0.006110084	0.016784172	-5.896754857	0.002353848	0.004303731	-7.860196294
E75H	75	E	H	0.033092948	0.08558948	-3.546422703	0.008960944	0.024615378	-5.344296296	0.024270482	0.044375684	-4.49408684
E75I	75	E	I	0.024794479	0.064126851	-3.962927619	0.01894838	0.052050491	-4.263944418	0.013523126	0.024725424	-5.337860922
E75K	75	E	K	0.04991854	0.129106114	-2.953370777	0.006175001	0.016962496	-5.881507695	0.020928503	0.038265273	-4.707820503
E75L	75	E	L	0.023129354	0.059820278	-4.063221569	0.027421551	0.075325976	-3.73070872	0.006622843	0.012109079	-6.367767017
E75M	75	E	M	0.011197436	0.02896033	-5.109778148	0.030121928	0.082743811	-3.59520479	0.028927291	0.052890104	-4.24085839
E75N	75	E	N	0.016783109	0.043406758	-4.525936501	0.029448886	0.080894991	-3.627805822	0.018743743	0.0342707	-4.866880546
E75P	75	E	P	0.018360304	0.047485915	-4.396356551	0.008600441	0.02362509	-5.403536343	0.008501721	0.015544384	-6.007462703
E75Q	75	E	Q	0.050276956	0.130033099	-2.943049195	0.050951749	0.13996255	-2.836887242	0.027954661	0.051111765	-4.290200779
E75R	75	E	R	0.014002226	0.03621446	-4.78729033	0.008874975	0.024379224	-5.358203995	0.008577804	0.015683492	-5.994609361
E75S	75	E	S	0.11185178	0.289286278	-1.7894302	0.053554892	0.147113288	-2.765000532	0.054199234	0.09909684	-3.33501714
E75T	75	E	T	0.005500191	0.014225343	-6.135392767	0.00854648	0.023476863	-5.412616571	0.018383119	0.033611342	-4.894908063
E75V	75	E	V	0.024772074	0.064068906	-3.964231828	0.030382279	0.083458986	-3.582788794	0.023278773	0.042562462	-4.554274581
E75W	75	E	W	0.005093566	0.013173673	-6.246198582	0.075736832	0.208046248	-2.265023827	0.015940944	0.029146116	-5.100552528
E75Y	75	E	Y	0.03949002	0.102134458	-3.291458409	0.012467175	0.034246864	-4.867884294	0.03304804	0.060424401	-4.048724913
C76A	76	C	A	0.049082886	0.139317264	-2.843554046	0.03384968	0.099054796	-3.335629364	0.006200293	0.015829776	-5.981215347
C76C	76	C	C	0.352310145	1	0	0.341726811	1	0	0.391685467	1	0
C76D	76	C	D	0.007677281	0.021791256	-5.520106823	0.009861194	0.028856953	-5.114937232	0.003793629	0.009685397	-6.689973029
C76E	76	C	E	0.015904557	0.045143624	-4.469333936	0.029487976	0.086291082	-3.534644714	0.029162205	0.074453121	-3.747523864
C76F	76	C	F	0.032024683	0.090899122	-3.459589824	0.02228128	0.065202025	-3.938939419	0.026164797	0.066800531	-3.903996614
C76G	76	C	G	0.011421998	0.032420293	-4.946959074	0.013315975	0.038966727	-4.681613433	0.024105257	0.061542383	-4.022275892
C76H	76	C	H	0.023708152	0.067293414	-3.893390876	0.019113662	0.055932579	-4.160167331	0.023104931	0.058988481	-4.083422935
C76I	76	C	I	0.078958415	0.224116211	-2.157681088	0.017386542	0.050878483	-4.29680052	0.020133567	0.051402384	-4.282020916
C76K	76	C	K	0.00777467	0.022067687	-5.501920749	0.011691396	0.034212697	-4.869324334	0.007452709	0.019027279	-5.715786895
C76L	76	C	L	0.125534049	0.356316872	-1.488767297	0.072770128	0.212948254	-2.231425192	0.107509551	0.274479296	-1.865230763
C76M	76	C	M	0.058202355	0.165202041	-2.597696588	0.209301979	0.612483341	-0.70725749	0.028707515	0.073292266	-3.770195223
C76N	76	C	N	0.023335139	0.066234649	-3.916270061	0.013035903	0.038147147	-4.712281024	0.035091034	0.089589829	-3.480521236
C76P	76	C	P	0.011343269	0.032196827	-4.956937652	0.016298702	0.047695123	-4.390014423	0.007804377	0.019925113	-5.649268294
C76Q	76	C	Q	0.013524329	0.038387567	-4.703217065	0.014078544	0.041198241	-4.601273446	0.031077506	0.079343016	-3.655752953
C76R	76	C	R	0.023009938	0.065311598	-3.936516987	0.010875692	0.031825691	-4.973664374	0.009695801	0.024754049	-5.336191677
C76S	76	C	S	0.026080769	0.074027869	-3.75578769	0.034042282	0.099618412	-3.327443782	0.005524184	0.014103623	-6.147790382
C76T	76	C	T	0.03093847	0.087816008	-3.509372243	0.051441083	0.150532769	-2.731850521	0.175180503	0.447247902	-1.160853382
C76V	76	C	V	0.012843688	0.036455629	-4.777714583	0.014242593	0.041678302	-4.584559674	0.006561024	0.016750747	-5.89963079
C76W	76	C	W	NA	NA	NA	NA	NA	NA	NA	NA	NA
C76Y	76	C	Y	0.049318752	0.139986749	-2.836637829	0.016094271	0.047096894	-4.408224276	0.015407849	0.039337302	-4.667958187
G77A	77	G	A	0.049181511	0.222113112	-2.170633533	0.025910747	0.092826739	-3.42931576	0.016567433	0.038465029	-4.700308783
G77C	77	G	C	0.049702757	0.224467162	-2.155423693	0.088538689	0.317194934	-1.656558366	0.020989556	0.048731985	-4.35898719
G77D	77	G	D	0.063775082	0.288020473	-1.79575673	0.027838337	0.099732441	-3.325793329	0.01583894	0.036773668	-4.765183106
G77E	77	G	E	0.021482933	0.097021035	-3.365558616	0.07363767	0.263811179	-1.922422394	0.036272493	0.084214767	-3.569782957
G77F	77	G	F	0.009977986	0.045062495	-4.471928995	0.01072461	0.038421532	-4.701941154	0.007346141	0.017055721	-5.873600425
G77G	77	G	G	0.221425517	1	0	0.279130211	1	0	0.430714164	1	0
G77H	77	G	H	0.073912219	0.333801722	-1.582936698	0.058792523	0.210627589	-2.247233678	0.010153732	0.023574178	-5.406648752
G77I	77	G	I	0.010898618	0.049220244	-4.344604383	0.008312827	0.029781181	-5.069455204	0.041921496	0.097330201	-3.360968649
G77K	77	G	K	0.12503424	0.564678552	-0.824498259	0.048719508	0.174540434	-2.518366805	0.092427825	0.214592026	-2.220331627
G77L	77	G	L	0.024448223	0.110412852	-3.17901999	0.018318424	0.065626806	-3.929570963	0.003183031	0.007390123	-7.080185816
G77M	77	G	M	0.029729524	0.134264219	-2.896853214	0.015303291	0.054824918	-4.189024438	0.059859864	0.138978164	-2.847069869
G77N	77	G	N	0.10070234	0.454791037	-1.136724272	0.128164435	0.459156445	-1.122942299	0.139941898	0.324906655	-1.621902801
G77P	77	G	P	0.010517061	0.04749706	-4.396017965	0.015374483	0.055079968	-4.18232848	0.001198652	0.002782941	-8.489174041
G77Q	77	G	Q	0.056858093	0.256782029	-1.961383856	0.065791757	0.235702745	-2.084959533	0.020296693	0.047123346	-4.407414201
G77R	77	G	R	0.033510448	0.151339596	-2.724138595	0.034914652	0.125083743	-2.999033797	0.043007894	0.099852518	-3.324057378
G77S	77	G	S	0.044334848	0.200224658	-2.320308441	0.025789474	0.092392271	-3.436084015	0.032906122	0.076398979	-3.710302832
G77T	77	G	T	0.010099423	0.045610926	-4.454476726	0.021119848	0.075663069	-3.724266903	0.00380949	0.008844589	-6.820989123
G77V	77	G	V	0.018232099	0.082339648	-3.602268916	0.016525194	0.059202457	-4.07819914	0.005828935	0.013533186	-6.207354695
G77W	77	G	W	0.031253017	0.141144602	-2.824754136	0.00800242	0.028669129	-5.124358121	0.00910777	0.02114574	-5.56348916
G77Y	77	G	Y	0.014924061	0.067399916	-3.89110939	0.029090896	0.104219805	-3.262298637	0.008627871	0.020031547	-5.641582334
Y78A	78	Y	A	0.017490368	0.087404196	-3.516153641	0.008852112	0.020136954	-5.634010752	0.041945294	0.0959846	-3.381053237
Y78C	78	Y	C	0.039510317	0.197443959	-2.340484864	0.014975251	0.034065989	-4.875524106	0.07251198	0.165931209	-2.591342836
Y78D	78	Y	D	0.04254574	0.212612809	-2.23369958	0.033040982	0.075162262	-3.733847704	0.029365982	0.067199006	-3.895416305
Y78E	78	Y	E	0.019898134	0.099436468	-3.330081139	0.008118008	0.018467001	-5.758906608	0.014244413	0.032595891	-4.939166073
Y78F	78	Y	F	0.28105225	1.404495681	0.490052188	0.038555684	0.087707211	-3.511160729	0.092277187	0.211160488	-2.243588189
Y78G	78	Y	G	0.006163863	0.030802523	-5.020807687	0.002126026	0.004836324	-7.691873275	0.002868497	0.006564062	-7.251195388
Y78H	78	Y	H	0.010193666	0.050940563	-4.295041295	0.012084464	0.02748997	-5.184950858	0.004326098	0.009899531	-6.658424116
Y78I	78	Y	I	0.008671771	0.043335233	-4.528315724	0.005046006	0.011478751	-6.444890547	0.004656076	0.01065463	-6.552375672
Y78K	78	Y	K	0.023287181	0.11637247	-3.103178295	0.008249397	0.018765888	-5.735743631	0.012028095	0.027524229	-5.183154046
Y78L	78	Y	L	0.169732207	0.848198695	-0.237525832	0.171640887	0.390451991	-1.356782926	0.161315457	0.36914271	-1.437749429
Y78M	78	Y	M	0.057601876	0.287852476	-1.796598472	0.083426805	0.1897809	-2.397593291	0.025375077	0.058066505	-4.106149981
Y78N	78	Y	N	0.005026226	0.02511744	-5.315166775	0.028117863	0.063963054	-3.966617357	0.05049993	0.115560414	-3.11328082
Y78P	78	Y	P	0.006755693	0.033760062	-4.888538637	0.009494909	0.021599201	-5.532878268	0.005065614	0.011591788	-6.430753043
Y78Q	78	Y	Q	0.018564418	0.092771521	-3.430174189	0.009774241	0.022234631	-5.491047732	0.002986786	0.006834746	-7.192896541
Y78R	78	Y	R	0.013189816	0.065913152	-3.92328982	0.006618713	0.015056377	-6.053481562	0.006383175	0.014606799	-6.09721618
Y78S	78	Y	S	0.014156877	0.070745824	-3.821211203	0.007800208	0.017744063	-5.816519801	0.002379895	0.00544598	-7.520592596
Y78T	78	Y	T	0.004866471	0.024319099	-5.361766409	0.006257882	0.014235551	-6.134357843	0.017753158	0.040625053	-4.621486506
Y78V	78	Y	V	0.04047226	0.202251056	-2.30578086	0.094092653	0.214043775	-2.224022213	0.010719772	0.024530357	-5.349287946
Y78W	78	Y	W	0.020711851	0.103502835	-3.272257812	0.012132541	0.027599337	-5.179222567	0.00629726	0.014410198	-6.11676605
Y78Y	78	Y	Y	0.200109017	1	0	0.43959537	1	0	0.437000253	1	0
S79A	79	S	A	0.043394443	0.260770393	-1.939148014	0.004377428	0.016197688	-5.948068252	0.011775783	0.034653154	-4.850869526
S79C	79	S	C	0.004980451	0.029929044	-5.062309985	0.045930276	0.169954675	-2.556778048	0.005404886	0.015905214	-5.974356405
S79D	79	S	D	0.040701	0.244584679	-2.031594061	0.102042725	0.377586197	-1.40512207	0.091858153	0.270315339	-1.887284714
S79E	79	S	E	0.024671459	0.148258293	-2.753815286	0.035643025	0.131889014	-2.922603703	0.026192636	0.077078311	-3.697531229
S79F	79	S	F	0.058466487	0.351342889	-1.509048397	0.019822586	0.073349031	-3.769078277	0.119965749	0.353028896	-1.502141819
S79G	79	S	G	0.024887745	0.149558022	-2.741222804	0.039212103	0.145095586	-2.78492446	0.051129435	0.150461012	-2.732538394
S79H	79	S	H	0.060049634	0.3608565	-1.470502852	0.0336804	0.124626761	-3.0043142	0.023310373	0.06859654	-3.865720379
S79I	79	S	I	0.063402259	0.381003441	-1.392124068	0.035877042	0.132754942	-2.913162524	0.026590353	0.078248692	-3.675789558
S79K	79	S	K	0.027319531	0.164171363	-2.6067256	0.027829764	0.102977793	-3.279594841	0.011204206	0.032971149	-4.922652045
S79L	79	S	L	0.08814666	0.529700067	-0.916752404	0.059165739	0.218929534	-2.191461503	0.065601578	0.193048872	-2.372961967
S79M	79	S	M	0.051778096	0.311150316	-1.684316382	0.019847816	0.073442388	-3.767243225	0.005865625	0.017261053	-5.856335692
S79N	79	S	N	0.070888835	0.425992554	-1.23109988	0.112222971	0.415255913	-1.267927382	0.046898462	0.138010327	-2.857151871
S79P	79	S	P	0.00519445	0.031215026	-5.001615527	0.004109098	0.015204794	-6.039329943	0.004528413	0.013325976	-6.22961502
S79Q	79	S	Q	0.065437786	0.393235544	-1.346534365	0.060780257	0.224903699	-2.152620706	0.037401413	0.110062911	-3.183599706
S79R	79	S	R	0.03157766	0.189759755	-2.397754041	0.037375214	0.13829859	-2.854141651	0.006473203	0.019049002	-5.714140748
S79S	79	S	S	0.166408625	1	0	0.270250146	1	0	0.339818499	1	0
S79T	79	S	T	0.052721898	0.316821909	-1.658255992	0.056153746	0.207784331	-2.266841232	0.043169889	0.127038079	-2.976667095
S79V	79	S	V	0.042547051	0.255678158	-1.967599177	0.008822181	0.032644502	-4.937016151	0.032021779	0.094232007	-3.407639019
S79W	79	S	W	0.022467575	0.135014485	-2.888813903	0.00587608	0.021743115	-5.523297575	0.006656988	0.019589833	-5.673751062
S79Y	79	S	Y	0.054958357	0.330261467	-1.598319439	0.020981403	0.077636973	-3.687112317	0.044132576	0.129871024	-2.944848515
D80A	80	D	A	0.07138094	0.198031474	-2.336198355	0.067793972	0.165242353	-2.597344589	0.019589619	0.042632601	-4.551899106
D80C	80	D	C	0.007538773	0.020914746	-5.579335691	0.016576762	0.040404523	-4.629339386	0.006016844	0.01309437	-6.254909515
D80D	80	D	D	0.360452501	1	0	0.410269954	1	0	0.459498572	1	0
D80E	80	D	E	NA	NA	NA	NA	NA	NA	NA	NA	NA
D80F	80	D	F	0.005358838	0.014866974	-6.071745171	0.010792815	0.026306618	-5.248430428	0.008472171	0.018437861	-5.761184894
D80G	80	D	G	0.026135524	0.072507539	-3.78572519	0.018450741	0.044972197	-4.474822832	0.005491014	0.011950013	-6.386844027
D80H	80	D	H	0.010459266	0.029017043	-5.106955661	0.010214793	0.024897735	-5.327841673	0.022659444	0.049313416	-4.341875983
D80I	80	D	I	0.037701996	0.104596295	-3.257096352	0.013948093	0.033997355	-4.878433677	0.042708607	0.092946114	-3.427461636
D80K	80	D	K	0.060163754	0.166911741	-2.582842658	0.045600576	0.111147735	-3.16944954	0.019229028	0.041847851	-4.578702634
D80L	80	D	L	0.025618807	0.071074017	-3.814533954	0.004758845	0.011599301	-6.429818291	0.004958656	0.010791451	-6.533967331
D80M	80	D	M	0.016767997	0.046519298	-4.426026876	0.019024562	0.04637084	-4.430638336	0.012005842	0.026128137	-5.258251907
D80N	80	D	N	0.008803706	0.024424038	-5.355554437	0.031547477	0.076894437	-3.700976963	0.020604445	0.04484115	-4.479032899
D80P	80	D	P	0.010578961	0.029349113	-5.090539311	0.006704806	0.016342425	-5.935234112	0.002081358	0.00452963	-7.786391144
D80Q	80	D	Q	0.092903139	0.257740309	-1.956009913	0.12561194	0.306168995	-1.707599901	0.201939944	0.439478937	-1.186134072
D80R	80	D	R	0.020787218	0.057669784	-4.116040583	0.057708473	0.140659759	-2.829718442	0.007749541	0.016865213	-5.889805693
D80S	80	D	S	0.06420501	0.178123358	-2.489051381	0.036474987	0.088904846	-3.491594138	0.027831322	0.060568898	-4.045279027
D80T	80	D	T	0.016440883	0.045611788	-4.454449455	0.014000308	0.034124623	-4.873043077	0.001511595	0.003289662	-8.247844958
D80V	80	D	V	0.060072203	0.166657752	-2.585039672	0.028517355	0.069508758	-3.84666143	0.019411387	0.042244717	-4.565085271
D80W	80	D	W	0.023317931	0.064690717	-3.95029749	0.017054475	0.041568909	-4.588351292	0.055471522	0.120721859	-3.050241172
D80Y	80	D	Y	0.024063677	0.066759634	-3.904880148	0.014258363	0.034753612	-4.846693276	0.01187802	0.025849961	-5.273694084
R81A	81	R	A	0.0319736	0.120620503	-3.051452934	0.059676037	0.155700187	-2.683157417	0.004365332	0.006873844	-7.184667097
R81C	81	R	C	0.043074644	0.162499227	-2.621495243	0.033512579	0.087437354	-3.515606447	0.012520849	0.019715882	-5.664497953
R81D	81	R	D	0.011865504	0.044762649	-4.481560771	0.013395736	0.034950689	-4.838535273	0.028551056	0.044957753	-4.475286266
R81E	81	R	E	0.036137461	0.136328683	-2.87483896	0.039295501	0.10252552	-3.285945027	0.004556523	0.007174901	-7.122825267
R81F	81	R	F	0.024120496	0.090994646	-3.458074525	0.005158612	0.013459287	-6.215254218	0.011667445	0.018372074	-5.766341679
R81G	81	R	G	0.007597593	0.028661944	-5.12471974	0.004151465	0.010831547	-6.528616867	0.012327129	0.019410841	-5.686993574
R81H	81	R	H	0.02768513	0.104442238	-3.259222819	0.077900573	0.203249651	-2.29867522	0.023067272	0.036322744	-4.782982986
R81I	81	R	I	0.054145285	0.204263254	-2.291498404	0.04743603	0.1237649	-3.014325878	0.009904422	0.01559594	-6.002685639
R81K	81	R	K	0.074931454	0.28267914	-1.822762668	0.012008651	0.031331658	-4.996235054	0.024833018	0.039103166	-4.676570777
R81L	81	R	L	0.077744574	0.293291641	-1.769592139	0.07451794	0.194424056	-2.362721361	0.022058039	0.034733562	-4.847525839
R81M	81	R	M	NA	NA	NA	NA	NA	NA	NA	NA	NA
R81N	81	R	N	0.015747232	0.05940648	-4.073235883	0.05876907	0.153333827	-2.705252085	0.005573842	0.008776817	-6.832086403
R81P	81	R	P	0.01274383	0.048076139	-4.378535152	0.022093987	0.057645213	-4.116655394	0.009274783	0.014604482	-6.097444974
R81Q	81	R	Q	0.092129196	0.347557675	-1.524675692	0.01259233	0.032854529	-4.927763946	0.043325105	0.068221623	-3.873627122
R81R	81	R	R	0.265075995	1	0	0.383275309	1	0	0.635064129	1	0
R81S	81	R	S	0.02052994	0.077449263	-3.690604686	0.009420989	0.024580213	-5.346358771	0.019424002	0.03058589	-5.030989935
R81T	81	R	T	0.02538313	0.095757934	-3.384464166	0.019493324	0.050859849	-4.297329004	0.022092422	0.034787702	-4.845278809
R81V	81	R	V	0.058722536	0.221530948	-2.174419835	0.02478168	0.064657649	-3.951035139	0.010291847	0.016205997	-5.947328452
R81W	81	R	W	NA	NA	NA	NA	NA	NA	NA	NA	NA
R81Y	81	R	Y	0.018612869	0.070217104	-3.832033694	0.008016734	0.020916386	-5.579222602	0.012448742	0.019602339	-5.672830376
A82A	82	A	A	0.442976246	1	0	0.48895663	1	0	0.591750804	1	0
A82C	82	A	C	0.033917145	0.07656651	-3.707142688	0.010434989	0.021341338	-5.550205555	0.029075871	0.049135329	-4.347095465
A82D	82	A	D	0.011097548	0.025052243	-5.318916419	0.00864599	0.017682529	-5.821531524	0.029990039	0.050680183	-4.30243445
A82E	82	A	E	0.009139425	0.020631863	-5.59898208	0.036106346	0.073843659	-3.759382158	0.049886833	0.084303786	-3.568258772
A82F	82	A	F	0.043747715	0.098758602	-3.339949769	0.111809722	0.228670019	-2.128660868	0.011992221	0.020265661	-5.624818961
A82G	82	A	G	0.010633245	0.024004099	-5.38057543	0.005322699	0.010885831	-6.521404627	0.005934109	0.010028054	-6.639814577
A82H	82	A	H	0.03067995	0.069258679	-3.851861323	0.019851191	0.040599083	-4.622409061	0.016884416	0.028532984	-5.131225571
A82I	82	A	I	0.06570559	0.148327571	-2.75314131	0.019292056	0.039455556	-4.663627717	0.016725593	0.028264589	-5.144860482
A82K	82	A	K	0.026925451	0.060783058	-4.040186933	0.013305511	0.027212047	-5.199610708	0.039001069	0.065907928	-3.923404182
A82L	82	A	L	0.010931807	0.024678089	-5.340625508	0.007863484	0.016082171	-5.958394045	0.010992281	0.018575862	-5.750427037
A82M	82	A	M	0.052566279	0.118666135	-3.075019817	0.016958287	0.0346826	-4.849644122	0.01358734	0.022961253	-5.444654825
A82N	82	A	N	0.01625651	0.036698379	-4.768139834	0.017136901	0.035047895	-4.834528388	0.038012946	0.064238097	-3.960427029
A82P	82	A	P	0.014355732	0.032407452	-4.947530587	0.004545557	0.009296441	-6.749105728	0.006448736	0.010897723	-6.519829431
A82Q	82	A	Q	0.007085562	0.015995355	-5.966203191	0.008622288	0.017634054	-5.825492019	0.009951054	0.016816291	-5.893996615
A82R	82	A	R	0.012518705	0.028260443	-5.145072132	0.01120208	0.022910171	-5.447867974	0.006677536	0.011284372	-6.469529996
A82S	82	A	S	0.027720726	0.062578357	-3.998192417	0.021518462	0.044008938	-4.506059647	0.002873893	0.004856593	-7.685839612
A82T	82	A	T	0.015642785	0.03531292	-4.823660068	0.061888625	0.126572832	-2.981960323	0.016019635	0.027071591	-5.207076536
A82V	82	A	V	0.059126259	0.133475011	-2.905358432	0.11144504	0.227924183	-2.133374093	0.00663771	0.01121707	-6.478160328
A82W	82	A	W	0.052762901	0.11911	-3.069633554	0.013299902	0.027200575	-5.200219026	0.02053447	0.034701213	-4.848870113
A82Y	82	A	Y	0.056210419	0.126892626	-2.978319863	0.011794242	0.024121243	-5.373551938	0.077023442	0.130161955	-2.941620269
R83A	83	R	A	0.026769284	0.065511392	-3.932110385	0.01306525	0.023303947	-5.423281882	0.00714338	0.012185644	-6.358673641
R83C	83	R	C	0.011999876	0.029366815	-5.089669384	0.036973756	0.06594856	-3.922515038	0.017639978	0.030091426	-5.054503718
R83D	83	R	D	0.015549761	0.038054306	-4.715796482	0.018170171	0.032409382	-4.947444668	0.022120794	0.037735094	-4.727949334
R83E	83	R	E	0.010646943	0.026055835	-5.262249716	0.013530448	0.0241337	-5.372807053	0.030062012	0.051281742	-4.285410921
R83F	83	R	F	0.011710655	0.028659015	-5.124867157	0.005287515	0.009431121	-6.72835495	0.016147109	0.027544791	-5.182076651
R83G	83	R	G	0.008134927	0.01990828	-5.650487573	0.030340287	0.054116715	-4.207781911	0.00373163	0.006365658	-7.295474649
R83H	83	R	H	0.062438795	0.152803952	-2.710246238	0.046427614	0.082811015	-3.59403351	0.074537943	0.127151686	-2.975377498
R83I	83	R	I	0.041248882	0.100946731	-3.308333897	0.043002243	0.076701322	-3.70460475	0.004852978	0.008278526	-6.916410296
R83K	83	R	K	0.049738656	0.121723412	-3.038321411	0.03657932	0.065245021	-3.937988379	0.029195571	0.049803711	-4.327602953
R83L	83	R	L	0.077643171	0.190013011	-2.395829884	0.06845625	0.122102582	-3.033834381	0.02002398	0.034158212	-4.871623716
R83M	83	R	M	0.051012247	0.124840221	-3.001845274	0.012851518	0.022922722	-5.44707783	0.032268955	0.055046489	-4.183205643
R83N	83	R	N	0.009043533	0.022131874	-5.497730595	0.006132879	0.010938962	-6.514380327	0.015984745	0.02726782	-5.196656805
R83P	83	R	P	0.006795579	0.016630547	-5.910020577	0.004578934	0.008167255	-6.935933078	0.002223128	0.003792357	-8.04268941
R83Q	83	R	Q	0.026080853	0.063826624	-3.969697846	0.013954572	0.024890193	-5.328278758	0.056137042	0.095762229	-3.384399462
R83R	83	R	R	0.408620286	1	0	0.560645391	1	0	0.586212776	1	0
R83S	83	R	S	0.002884774	0.007059791	-7.14615884	0.005550202	0.009899666	-6.658404498	0.009730262	0.016598515	-5.912802021
R83T	83	R	T	0.018926452	0.046317945	-4.432284958	0.012206318	0.021771905	-5.521388543	0.002729609	0.004656346	-7.746586054
R83V	83	R	V	0.031503419	0.077097051	-3.697180505	0.042310993	0.075468369	-3.727984103	0.023231034	0.039629013	-4.657299148
R83W	83	R	W	0.009383955	0.022964975	-5.444420972	0.018319283	0.032675348	-4.935653607	0.025106185	0.042827768	-4.545309708
R83Y	83	R	Y	0.119867952	0.29334802	-1.769314839	0.011617056	0.020720862	-5.592772169	0.020920889	0.035688217	-4.808408374
S84A	84	S	A	0.099579358	0.408771654	-1.290632938	0.156311139	0.633492298	-0.658601016	0.027442875	0.065821866	-3.925289257
S84C	84	S	C	0.047578993	0.195310996	-2.356154919	0.072003914	0.291814938	-1.776874359	0.00548987	0.013167479	-6.246877058
S84D	84	S	D	0.014354856	0.058926452	-4.084940778	0.005784803	0.023444445	-5.414610071	0.016893713	0.040519651	-4.625234433
S84E	84	S	E	0.092204956	0.378499852	-1.401635359	0.152254619	0.617052176	-0.696535611	0.038831738	0.093138109	-3.424484604
S84F	84	S	F	0.012232906	0.050215879	-4.315712539	0.002649497	0.01073779	-6.541159029	0.010999808	0.026383093	-5.244242492
S84G	84	S	G	0.06483196	0.266134148	-1.909774457	0.022168202	0.089842512	-3.476457931	0.020596334	0.049400406	-4.339333285
S84H	84	S	H	0.087036655	0.357284059	-1.484856547	0.048545443	0.196743269	-2.345613815	0.061093772	0.146533702	-2.770695579
S84I	84	S	I	0.003553774	0.014588186	-6.099055691	0.007611551	0.030847826	-5.018687365	0.01455953	0.034921101	-4.83975714
S84K	84	S	K	0.021429618	0.087968236	-3.506873508	0.006165235	0.024986248	-5.322721926	0.009130792	0.021900248	-5.512908957
S84L	84	S	L	0.005806611	0.023836042	-5.39071148	0.003492927	0.014156013	-6.142441211	0.008854976	0.021238703	-5.557160551
S84M	84	S	M	0.019057845	0.078232144	-3.67609469	0.02889754	0.117114936	-3.094003021	0.071683047	0.17193213	-2.540088923
S84N	84	S	N	0.037838961	0.155328322	-2.686607184	0.046336651	0.187791555	-2.412795911	0.01467651	0.035201679	-4.828211964
S84P	84	S	P	0.008518981	0.034970281	-4.837726794	0.001873286	0.007591987	-7.041306688	0.003890924	0.009332401	-6.743536038
S84Q	84	S	Q	0.086685226	0.355841449	-1.490693528	0.065154096	0.264054233	-1.921093825	0.014728612	0.035326645	-4.823099456
S84R	84	S	R	0.009739547	0.039980684	-4.644553043	0.00825965	0.033474419	-4.90079718	0.004356466	0.010449004	-6.580490742
S84S	84	S	S	0.24360632	1	0	0.246745129	1	0	0.416926419	1	0
S84T	84	S	T	0.107405556	0.44089807	-1.181482933	0.110239095	0.446773134	-1.16238566	0.239963652	0.575553961	-0.7969769
S84V	84	S	V	0.029491327	0.121061418	-3.046188938	0.003006135	0.012183159	-6.358967903	0.005022602	0.012046736	-6.375213882
S84W	84	S	W	0.005573931	0.022880898	-5.44971254	0.006539154	0.026501652	-5.237773903	0.007697593	0.018462713	-5.75924164
S84Y	84	S	Y	0.003472619	0.014255043	-6.132383773	0.005961934	0.024162317	-5.371097358	0.007160766	0.017175131	-5.863535057
I85A	85	I	A	0.023786927	0.051514688	-4.278872352	0.022790652	0.046466295	-4.427671561	0.009171419	0.013503197	-6.210555197
I85C	85	I	C	0.009777399	0.021174641	-5.561518663	0.022336335	0.04554002	-4.456721267	0.009672534	0.014240994	-6.133806353
I85D	85	I	D	0.008260707	0.017889984	-5.804704096	0.005939345	0.012109323	-6.36773802	0.01398921	0.020596491	-5.601457647
I85E	85	I	E	0.068734615	0.148856652	-2.748004398	0.071928755	0.146650601	-2.769545109	0.010744165	0.01581877	-5.982218756
I85F	85	I	F	0.033502429	0.072555282	-3.78477554	0.054703446	0.111531102	-3.16448201	0.040305821	0.059342769	-4.07478394
I85G	85	I	G	0.017300278	0.037466732	-4.738246025	0.001854913	0.003781854	-8.046690432	0.011553099	0.017009774	-5.87749222
I85H	85	I	H	0.029889725	0.06473135	-3.949391603	0.008591219	0.017516048	-5.835178921	0.012702922	0.018702672	-5.74061176
I85I	85	I	I	0.461750375	1	0	0.490477054	1	0	0.679203572	1	0
I85K	85	I	K	0.007401484	0.016029188	-5.963154827	0.009234908	0.018828419	-5.730944291	0.021052255	0.030995501	-5.011797362
I85L	85	I	L	0.080289519	0.173880788	-2.523829554	0.054831218	0.111791607	-3.16111622	0.026704505	0.03931738	-4.668688991
I85M	85	I	M	NA	NA	NA	NA	NA	NA	NA	NA	NA
I85N	85	I	N	0.0598192	0.129548784	-2.948432623	0.047750931	0.097356096	-3.360584876	0.013792526	0.020306911	-5.621885419
I85P	85	I	P	0.021494209	0.046549414	-4.425093181	0.012564856	0.025617622	-5.286719602	0.007421336	0.010926526	-6.516021389
I85Q	85	I	Q	0.017811019	0.03857283	-4.696271177	0.020732818	0.042270719	-4.564197546	0.009873464	0.014536826	-6.104143905
I85R	85	I	R	0.029246124	0.063337521	-3.980795787	0.008520391	0.017371641	-5.847122181	0.002820935	0.004153298	-7.911526731
I85S	85	I	S	0.005355279	0.011597779	-6.430007584	0.026430523	0.053887379	-4.213908785	0.004764747	0.007015197	-7.155300667
I85T	85	I	T	0.035158757	0.076142347	-3.715157158	0.015504297	0.031610648	-4.983445599	0.03471066	0.051104943	-4.290393353
I85V	85	I	V	0.021016733	0.045515357	-4.457502799	0.051944835	0.105906759	-3.239133426	0.006940388	0.010218421	-6.612683871
I85W	85	I	W	0.012980952	0.028112488	-5.152645072	0.014171212	0.028892711	-5.113150621	0.022234663	0.032736375	-4.932961613
I85Y	85	I	Y	0.0054903	0.011890191	-6.394084249	0.007536255	0.015365152	-6.024194106	0.012694278	0.018689946	-5.741593775
T86A	86	T	A	0.011196105	0.026772016	-5.223130406	0.011901494	0.021605027	-5.53248918	0.004975824	0.0074092	-7.076466591
T86C	86	T	C	0.018596897	0.044468715	-4.491065479	0.016829158	0.030550316	-5.032668892	0.014348873	0.021366042	-5.548536484
T86D	86	T	D	0.008406784	0.020102218	-5.636501486	0.015245175	0.027674878	-5.175279228	0.004978696	0.007413476	-7.075634106
T86E	86	T	E	0.004820782	0.011527407	-6.438788175	0.005460471	0.009912505	-6.656534565	0.006780766	0.01009683	-6.629953812
T86F	86	T	F	0.038288803	0.091555805	-3.449204825	0.008824505	0.016019304	-5.964044729	0.010606058	0.015792842	-5.984585369
T86G	86	T	G	0.015912138	0.038048947	-4.715999677	0.011019672	0.020004236	-5.643550655	0.006673394	0.009936949	-6.652981257
T86H	86	T	H	0.013304328	0.031813176	-4.974231762	0.002677363	0.004860272	-7.684747236	0.005163624	0.007688842	-7.023017925
T86I	86	T	I	0.052811716	0.126282852	-2.985269343	0.069968533	0.127015311	-2.976925681	0.173083897	0.257728803	-1.956074318
T86K	86	T	K	0.033152789	0.079274619	-3.656997145	0.033652119	0.061089381	-4.032934566	0.015586681	0.023209187	-5.429160202
T86L	86	T	L	0.005574166	0.01332889	-6.229299592	0.00487811	0.008855333	-6.819237742	0.002915952	0.004341969	-7.84743496
T86M	86	T	M	0.018240095	0.043615535	-4.519014114	0.020448845	0.037121208	-4.75161254	0.008217698	0.012236479	-6.352667735
T86N	86	T	N	0.007616479	0.018212449	-5.778931279	0.00542182	0.009842341	-6.666782825	0.005417294	0.008066566	-6.953829641
T86P	86	T	P	0.011675297	0.027917854	-5.162668166	0.001158779	0.002103555	-8.892955024	0.005246834	0.007812744	-6.999954991
T86Q	86	T	Q	0.013919457	0.033284069	-4.909024396	0.00556764	0.01010705	-6.628494187	0.005674845	0.00845007	-6.886820952
T86R	86	T	R	0.03761874	0.089953557	-3.474675858	0.026659838	0.04839615	-4.3689639	0.020932017	0.031168605	-5.0037626
T86S	86	T	S	0.010557568	0.025245152	-5.307849838	0.011791013	0.021404468	-5.545944242	0.010347402	0.015407692	-6.020205377
T86T	86	T	T	0.418201802	1	0	0.550866916	1	0	0.671573743	1	0
T86V	86	T	V	0.265256463	0.634278623	-0.656811376	0.162975197	0.295852214	-1.757051402	0.004128035	0.006146808	-7.34594696
T86W	86	T	W	0.011043041	0.026406011	-5.24298982	0.023033668	0.04181349	-4.579887728	0.0092821	0.013821416	-6.176950796
T86Y	86	T	Y	0.003806551	0.009102188	-6.779570952	0.011619684	0.021093451	-5.567061019	0.014066268	0.020945233	-5.577234269
L87A	87	L	A	0.073186691	0.311460428	-1.682879218	0.016781367	0.065230993	-3.938298591	0.007698199	0.015259528	-6.03414587
L87C	87	L	C	0.088236953	0.375509792	-1.413077567	0.047913882	0.186246452	-2.424715154	0.027379397	0.054272004	-4.203648016
L87D	87	L	D	0.00612169	0.026052062	-5.26245862	0.014069543	0.054689839	-4.192583372	0.012740706	0.025254889	-5.307293491
L87E	87	L	E	0.002678757	0.011399979	-6.454825004	0.015312497	0.059521337	-4.070449247	0.017446002	0.034581825	-4.853842196
L87F	87	L	F	NA	NA	NA	NA	NA	NA	NA	NA	NA
L87G	87	L	G	0.004328011	0.018418706	-5.762684483	0.001934166	0.007518312	-7.055375466	0.002576086	0.005106371	-7.613486017
L87H	87	L	H	0.027554665	0.117264324	-3.092163936	0.047911779	0.186238277	-2.424778478	0.029566137	0.058606605	-4.092792917
L87I	87	L	I	0.099217263	0.422238673	-1.243869372	0.064347374	0.250125216	-1.999277586	0.006373801	0.012634279	-6.306512854
L87K	87	L	K	0.012562919	0.053463984	-4.225288844	0.005559563	0.021610625	-5.532115373	0.011073351	0.021949825	-5.509646758
L87L	87	L	L	0.2349791	1	0	0.257260642	1	0	0.504484727	1	0
L87M	87	L	M	0.050523128	0.215011156	-2.21751658	0.264363627	1.027610073	0.039292937	0.018841981	0.037348962	-4.742788045
L87N	87	L	N	0.03449745	0.146810715	-2.767970825	0.00994727	0.038666116	-4.692786331	0.008624568	0.017095795	-5.870214639
L87P	87	L	P	0.007408201	0.031527062	-4.987265472	0.001819806	0.007073782	-7.143302473	0.002111702	0.004185859	-7.900260707
L87Q	87	L	Q	0.033244836	0.141479971	-2.821330268	0.00523717	0.020357448	-5.618299443	0.033211987	0.065833484	-3.925034636
L87R	87	L	R	0.004927582	0.0209703	-5.575508708	0.002480074	0.009640318	-6.69670358	0.004034947	0.007998156	-6.966116923
L87S	87	L	S	0.00962507	0.040961387	-4.609591615	0.004305903	0.016737511	-5.900771166	0.002621281	0.005195958	-7.588394574
L87T	87	L	T	0.005687113	0.024202633	-5.368692196	0.007137883	0.027745725	-5.171590714	0.006038456	0.011969552	-6.384487013
L87V	87	L	V	0.081240681	0.345735776	-1.532258195	0.027771578	0.107951135	-3.211549689	0.178831773	0.354484017	-1.496207514
L87W	87	L	W	0.030632639	0.130363251	-2.939390864	0.008982802	0.034917125	-4.839921411	0.009998812	0.01981985	-5.656910143
L87Y	87	L	Y	0.135870335	0.578223063	-0.790301942	0.145825701	0.566840304	-0.818985754	0.074721848	0.148115183	-2.755208557
G88A	88	G	A	0.011880493	0.019310753	-5.694451804	0.026149492	0.042752046	-4.547862714	0.003688655	0.005647647	-7.468134333
G88C	88	G	C	0.008688999	0.014123244	-6.145784677	0.019437032	0.031777784	-4.975837686	0.012785158	0.019575175	-5.674830957
G88D	88	G	D	0.043414335	0.070566387	-3.824875046	0.018408082	0.030095544	-5.054306304	0.03122984	0.047815568	-4.386375779
G88E	88	G	E	0.012850277	0.020887055	-5.581247081	0.011519989	0.018834137	-5.730506264	0.039852365	0.061017395	-4.034635604
G88F	88	G	F	0.025142946	0.040867765	-4.61289284	0.083647242	0.136755647	-2.870327684	0.051677349	0.079122461	-3.659768882
G88G	88	G	G	0.615226831	1	0	0.611654754	1	0	0.653131214	1	0
G88H	88	G	H	0.022211334	0.036102675	-4.791750461	0.005754502	0.009408088	-6.731882709	0.008109507	0.012416352	-6.331614874
G88I	88	G	I	0.02297221	0.037339415	-4.743156881	0.014590618	0.023854336	-5.389604638	0.007734376	0.011841993	-6.399944237
G88K	88	G	K	0.016644228	0.027053806	-5.208024603	0.039534973	0.064636091	-3.951516233	0.019937155	0.030525497	-5.033841408
G88L	88	G	L	0.021544317	0.035018494	-4.835739154	0.006855905	0.011208782	-6.47922673	0.003207852	0.004911496	-7.669621637
G88M	88	G	M	0.026401865	0.042914034	-4.542406665	0.013749493	0.022479173	-5.475267233	0.042261166	0.064705475	-3.949968391
G88N	88	G	N	0.007253655	0.011790213	-6.406266465	0.028036523	0.04583717	-4.447338213	0.00830836	0.012720813	-6.296665315
G88P	88	G	P	0.021786919	0.035412824	-4.819584303	0.005048215	0.008253373	-6.920800373	0.006441045	0.009861793	-6.663934307
G88Q	88	G	Q	0.00695039	0.01129728	-6.467880699	0.019936403	0.032594209	-4.939240525	0.015657582	0.023973103	-5.382439504
G88R	88	G	R	0.016477417	0.02678267	-5.222556404	0.022881909	0.037409844	-4.740438248	0.00382316	0.005853587	-7.416463447
G88S	88	G	S	0.035325328	0.05741838	-4.122343567	0.007476348	0.01222315	-6.35424011	0.012336605	0.018888402	-5.726355565
G88T	88	G	T	0.015820397	0.025714738	-5.281260719	0.00748424	0.012236052	-6.352718023	0.004043629	0.006191143	-7.335578466
G88V	88	G	V	0.013259799	0.0215527	-5.535987586	0.01509875	0.024685086	-5.340216527	0.039330004	0.060217615	-4.053670632
G88W	88	G	W	0.018775266	0.030517631	-5.034213209	0.01144136	0.018705585	-5.74038714	0.018102139	0.02771593	-5.173140747
G88Y	88	G	Y	0.037372995	0.060746692	-4.041050337	0.031294171	0.051163128	-4.288751718	0.01834284	0.028084464	-5.154083901
N89A	89	N	A	0.014380062	0.030261759	-5.046360319	0.038346826	0.075621973	-3.7250507	0.003866602	0.006851155	-7.189437069
N89C	89	N	C	0.028803191	0.060614148	-4.044201608	0.042206295	0.08323305	-3.586699691	0.011761239	0.020839501	-5.584535423
N89D	89	N	D	0.046091998	0.096997144	-3.365913925	0.045199518	0.089135846	-3.487850469	0.049754289	0.088158621	-3.50375454
N89E	89	N	E	0.015959177	0.033584888	-4.896043983	0.05084055	0.100260258	-3.31817824	0.020471458	0.036272963	-4.784961592
N89F	89	N	F	0.043373583	0.091276443	-3.453613617	0.019945267	0.039333123	-4.668111441	0.03514528	0.062273212	-4.00524449
N89G	89	N	G	0.020188585	0.04248536	-4.556890416	0.029735624	0.058640225	-4.091965545	0.004623772	0.008192768	-6.931433313
N89H	89	N	H	0.019698006	0.041452973	-4.592380621	0.010530865	0.020767423	-5.589533982	0.041075301	0.072780497	-3.780304286
N89I	89	N	I	0.028534793	0.060049325	-4.057708156	0.023255798	0.045861666	-4.446567432	0.022822577	0.040438864	-4.628113735
N89K	89	N	K	NA	NA	NA	NA	NA	NA	NA	NA	NA
N89L	89	N	L	0.007256521	0.015270803	-6.033080217	0.013996396	0.027601635	-5.179102461	0.014642952	0.025945551	-5.268369034
N89M	89	N	M	0.041003861	0.086289542	-3.534670469	0.021690171	0.042774166	-4.547116458	0.050312688	0.089148038	-3.487653143
N89N	89	N	N	0.475189234	1	0	0.507085766	1	0	0.564372358	1	0
N89P	89	N	P	0.012806398	0.026950102	-5.213565449	0.026063572	0.051398746	-4.282123042	0.012335041	0.021856211	-5.515812861
N89Q	89	N	Q	0.016508133	0.034740124	-4.847253279	0.008938253	0.017626708	-5.826093134	0.017537831	0.031074928	-5.008105126
N89R	89	N	R	0.053906795	0.113442795	-3.139963116	0.006162334	0.012152449	-6.362609056	0.007561978	0.013398916	-6.221739909
N89S	89	N	S	0.006271532	0.013197968	-6.24354033	0.005884338	0.011604226	-6.429205881	0.004831545	0.008560918	-6.868018795
N89T	89	N	T	0.033329959	0.070140392	-3.833610693	0.030389249	0.059929209	-4.060596861	0.022972725	0.040704909	-4.6186534
N89V	89	N	V	0.022705893	0.047782844	-4.387363475	0.006762282	0.013335578	-6.228575801	0.006835562	0.012111794	-6.367443587
N89W	89	N	W	0.026463105	0.055689613	-4.166447915	0.013325782	0.026279148	-5.24993768	0.015411531	0.027307381	-5.194565235
N89Y	89	N	Y	0.038782126	0.081614068	-3.61503834	0.052723355	0.10397325	-3.265715689	0.040416154	0.071612568	-3.803643382
S90A	90	S	A	0.097726532	0.184515557	-2.438185632	0.078446026	0.182334336	-2.455341833	0.070426595	0.140721641	-2.829083879
S90C	90	S	C	0.028028596	0.052920245	-4.240036461	0.054556162	0.126806444	-2.979300036	0.034875871	0.069686597	-3.842974977
S90D	90	S	D	0.012766865	0.024104868	-5.37453167	0.010358449	0.024076439	-5.376234137	0.012071673	0.024120797	-5.373578625
S90E	90	S	E	0.009719126	0.018350491	-5.768037489	0.01364136	0.031707001	-4.979054754	0.009566099	0.01911433	-5.709201565
S90F	90	S	F	0.026109318	0.049296493	-4.342371172	0.020178157	0.046900666	-4.414247795	0.021976331	0.043911613	-4.509253672
S90G	90	S	G	0.088454711	0.167009613	-2.581996948	0.125372803	0.291407581	-1.778889683	0.062288549	0.12446075	-3.006237256
S90H	90	S	H	0.009613911	0.018151839	-5.78374051	0.003859069	0.008969745	-6.800717314	0.007599404	0.015184612	-6.041246124
S90I	90	S	I	0.01126855	0.021275929	-5.554634057	0.018231642	0.042376326	-4.560597675	0.018308646	0.036583093	-4.772679129
S90K	90	S	K	0.013010771	0.024565382	-5.347229505	0.010758412	0.025006084	-5.321577036	0.013287611	0.026550403	-5.235122438
S90L	90	S	L	0.003795882	0.007166931	-7.124428876	0.013016316	0.030254194	-5.046721037	0.007307762	0.014601874	-6.097702675
S90M	90	S	M	0.040066906	0.075649542	-3.724524842	0.03756614	0.087316052	-3.517609297	0.06156076	0.123006531	-3.023193176
S90N	90	S	N	0.010258209	0.019368325	-5.690157002	0.008457354	0.019657669	-5.668763926	0.009244656	0.018472044	-5.758512677
S90P	90	S	P	0.010020261	0.018919058	-5.724015899	0.015730497	0.036562843	-4.77347794	0.002362316	0.00472022	-7.726930194
S90Q	90	S	Q	0.008532726	0.016110473	-5.955857371	0.024636816	0.057264054	-4.126226379	0.012298074	0.024573176	-5.346771835
S90R	90	S	R	0.002631719	0.004968897	-7.652858551	0.002576384	0.005988363	-7.383622566	0.005000346	0.009991352	-6.645104326
S90S	90	S	S	0.529638442	1	0	0.430231783	1	0	0.500467407	1	0
S90T	90	S	T	0.04232318	0.07990957	-3.645487896	0.099739717	0.231827868	-2.10887409	0.023467189	0.046890543	-4.414559192
S90V	90	S	V	0.013030208	0.024602082	-5.345075773	0.005455345	0.012680014	-6.301299897	0.00532705	0.01064415	-6.553795441
S90W	90	S	W	0.01104095	0.020846203	-5.58407156	0.004735279	0.011006344	-6.505520841	0.01947002	0.038903672	-4.683949867
S90Y	90	S	Y	0.031963137	0.060348974	-4.050526945	0.022452287	0.052186491	-4.260179781	0.103093642	0.205994718	-2.27932075
T91A	91	T	A	0.012995991	0.055358585	-4.175049128	0.013164331	0.042200381	-4.566600149	0.0039386	0.011605639	-6.429030272
T91C	91	T	C	0.064010318	0.272662595	-1.874811294	0.044173709	0.141605932	-2.820046392	0.023470827	0.069160096	-3.85391631
T91D	91	T	D	0.006084236	0.025916816	-5.269967687	0.010295672	0.033004434	-4.921196343	0.004754285	0.01400917	-6.157484744
T91E	91	T	E	0.004747164	0.020221334	-5.627977997	0.009043407	0.028990096	-5.108296069	0.008306069	0.024475003	-5.352547152
T91F	91	T	F	0.01375514	0.058592305	-4.093144973	0.017364586	0.055664973	-4.167086375	0.027664571	0.081517555	-3.616745408
T91G	91	T	G	0.004171081	0.017767411	-5.814622679	0.002119687	0.006794997	-7.201311369	0.001415403	0.004170683	-7.905500462
T91H	91	T	H	0.089785183	0.382454919	-1.38663839	0.05503834	0.176434257	-2.502797389	0.047107346	0.138808427	-2.848832938
T91I	91	T	I	0.020353379	0.086698603	-3.527847448	0.014573642	0.046718156	-4.419872871	0.012864032	0.037905681	-4.721442121
T91K	91	T	K	0.004786718	0.020389822	-5.616007017	0.006984166	0.02238887	-5.481074501	0.019200561	0.056577155	-4.143636556
T91L	91	T	L	0.007857863	0.033471873	-4.900906894	0.010727657	0.034389232	-4.861899307	0.003957062	0.01166004	-6.422283434
T91M	91	T	M	0.018159822	0.077354784	-3.692365672	0.038130968	0.122234954	-3.032271198	0.044779764	0.131949879	-2.921938062
T91N	91	T	N	0.085599355	0.364624691	-1.455515835	0.059004978	0.189149955	-2.402397665	0.012207233	0.035970332	-4.797048707
T91P	91	T	P	0.003836045	0.016340272	-5.93542422	0.003390828	0.010869844	-6.523524954	0.001839131	0.005419257	-7.527689162
T91Q	91	T	Q	0.211348811	0.900275412	-0.151561676	0.20379932	0.65331152	-0.614157016	0.339677905	1.000908775	0.001310489
T91R	91	T	R	0.003096126	0.013188465	-6.244579562	0.00855828	0.027434943	-5.187841589	0.001337615	0.003941471	-7.987050182
T91S	91	T	S	0.162409966	0.691812261	-0.531547511	0.133303103	0.427324549	-1.226595894	0.086715281	0.255518786	-1.968498729
T91T	91	T	T	0.234760172	1	0	0.31194815	1	0	0.339369494	1	0
T91V	91	T	V	0.003004696	0.012799004	-6.287824612	0.011608892	0.037214172	-4.748004039	0.002165521	0.006381013	-7.291998732
T91W	91	T	W	0.008421639	0.035873374	-4.800942762	0.037706141	0.120873104	-3.048434833	0.007631869	0.022488377	-5.474676646
T91Y	91	T	Y	0.040816294	0.173863794	-2.52397056	0.009064143	0.029056568	-5.10499187	0.011597432	0.034173465	-4.870979656
I92A	92	I	A	0.019955682	0.040101301	-4.640207155	0.012834561	0.02693763	-5.214233247	0.022938881	0.043577065	-4.520287144
I92C	92	I	C	0.028829138	0.05793267	-4.109479044	0.034619092	0.072659773	-3.782699333	0.017039267	0.03236955	-4.949218868
I92D	92	I	D	0.023380459	0.046983451	-4.411703518	0.012891277	0.027056667	-5.207872069	0.007127303	0.01353976	-6.206654013
I92E	92	I	E	0.009782451	0.01965801	-5.668738927	0.004473061	0.009388219	-6.73493278	0.017397441	0.033049975	-4.919206991
I92F	92	I	F	0.031318054	0.062934191	-3.990012158	0.022199476	0.046593043	-4.423741619	0.012588904	0.023915181	-5.385929461
I92G	92	I	G	0.006899549	0.013864768	-6.17243274	0.036289112	0.076164871	-3.714730452	0.010103471	0.019193597	-5.70323107
I92H	92	I	H	0.005257701	0.010565444	-6.564502729	0.008478399	0.017794762	-5.812403531	0.039555573	0.075143849	-3.734201168
I92I	92	I	I	0.497631791	1	0	0.476454722	1	0	0.526398009	1	0
I92K	92	I	K	0.020783481	0.041764777	-4.581569466	0.033745991	0.070827279	-3.819551072	0.028180249	0.05353411	-4.223397769
I92L	92	I	L	0.051441032	0.103371676	-3.27408716	0.009179474	0.019266204	-5.697783873	0.077187472	0.14663329	-2.769715425
I92M	92	I	M	NA	NA	NA	NA	NA	NA	NA	NA	NA
I92N	92	I	N	0.008931187	0.01794738	-5.800082975	0.048941244	0.102719611	-3.283216452	0.013973326	0.026545173	-5.235406629
I92P	92	I	P	0.009454011	0.018998005	-5.718008289	0.008698337	0.018256377	-5.775455663	0.002688787	0.005107896	-7.613055016
I92Q	92	I	Q	0.031731141	0.063764297	-3.971107342	0.018121855	0.03803479	-4.716536562	0.015403121	0.029261358	-5.094859467
I92R	92	I	R	0.011566338	0.023242763	-5.427074595	0.004758326	0.009986942	-6.645741265	0.016149265	0.03067881	-5.026613648
I92S	92	I	S	0.025546879	0.05133691	-4.283859721	0.014893898	0.031259839	-4.999545823	0.032008745	0.060807116	-4.039616026
I92T	92	I	T	0.008595466	0.017272742	-5.85535905	0.02289647	0.04805592	-4.37914203	0.02699686	0.051286023	-4.285290501
I92V	92	I	V	0.069383918	0.139428226	-2.842405444	0.108540661	0.227808973	-2.134103521	0.067606524	0.128432332	-2.960919658
I92W	92	I	W	0.034181565	0.068688466	-3.863788318	0.054387297	0.11414998	-3.130997489	0.009177176	0.017433911	-5.841959966
I92Y	92	I	Y	0.054972556	0.110468336	-3.178295194	0.014226141	0.029858327	-5.065722839	0.004477906	0.008506692	-6.87718611
T93A	93	T	A	0.031008363	0.057471462	-4.12101043	0.017971221	0.028776161	-5.118982031	0.009194381	0.013109277	-6.253268106
T93C	93	T	C	0.023111438	0.042835158	-4.545060791	0.009435275	0.0151081	-6.048533928	0.016319143	0.023267706	-5.425527211
T93D	93	T	D	0.066674726	0.123576148	-3.01652779	0.015490573	0.024804059	-5.33327994	0.01446385	0.020622444	-5.59964087
T93E	93	T	E	0.017284399	0.032035219	-4.964197328	0.018590946	0.029768489	-5.070070211	0.011977491	0.017077412	-5.871766834
T93F	93	T	F	0.041272433	0.076495076	-3.708489312	0.034875234	0.055843473	-4.162467534	0.007229256	0.010307416	-6.600173506
T93G	93	T	G	0.005355134	0.009925302	-6.654673276	0.007932701	0.012702124	-6.298786388	0.003820639	0.005447437	-7.520206778
T93H	93	T	H	0.007107069	0.01317237	-6.246341265	0.017310382	0.027718003	-5.173032852	0.01645566	0.02346235	-5.413508689
T93I	93	T	I	0.007500353	0.01390129	-6.168637452	0.009121804	0.014606158	-6.097279414	0.008029111	0.011447844	-6.44878032
T93K	93	T	K	0.026220147	0.048596897	-4.362992002	0.040922411	0.065526429	-3.931779285	0.020008057	0.028527329	-5.131511498
T93L	93	T	L	0.024926736	0.046199666	-4.435973782	0.009143365	0.014640683	-6.093873285	0.00524251	0.007474729	-7.063762988
T93M	93	T	M	NA	NA	NA	NA	NA	NA	NA	NA	NA
T93N	93	T	N	0.013897672	0.025758198	-5.27882453	0.015169358	0.024289719	-5.363510372	0.019246372	0.027441326	-5.187506014
T93P	93	T	P	0.010301937	0.019093797	-5.710752194	0.004703509	0.007531427	-7.052861128	0.002274428	0.003242861	-8.268517146
T93Q	93	T	Q	0.026047012	0.048276005	-4.372549906	0.028862239	0.046215249	-4.435487223	0.004203508	0.005993329	-7.382426692
T93R	93	T	R	0.008499474	0.01575308	-5.98822225	0.00829748	0.013286221	-6.233925336	0.002426072	0.003459074	-8.175398292
T93S	93	T	S	0.026393209	0.048917652	-4.353501018	0.027811497	0.044532765	-4.488989003	0.009686418	0.013810818	-6.178057379
T93T	93	T	T	0.539543655	1	0	0.624517646	1	0	0.701364516	1	0
T93V	93	T	V	0.014675751	0.027200304	-5.200233433	0.008951872	0.014334057	-6.124409161	0.016901858	0.024098536	-5.374910709
T93W	93	T	W	0.00992552	0.018396139	-5.764453203	0.022521965	0.036062975	-4.793337756	0.074575372	0.106328978	-3.233393264
T93Y	93	T	Y	0.049118667	0.091037428	-3.457396384	0.024780885	0.039680039	-4.655442744	0.009211117	0.013133138	-6.250644496
T94A	94	T	A	0.065463368	0.171346017	-2.545015436	0.111593424	0.28842357	-1.793739026	0.018573728	0.0463714	-4.430620897
T94C	94	T	C	0.047970805	0.125560397	-2.9935466	0.196778907	0.508593363	-0.975415458	0.009909115	0.024739219	-5.337056219
T94D	94	T	D	0.024957638	0.065324959	-3.936221866	0.008682441	0.022440575	-5.477746569	0.008597198	0.021463872	-5.54194585
T94E	94	T	E	0.009861849	0.025812734	-5.275773254	0.008148703	0.021061081	-5.569276702	0.009770508	0.024393171	-5.357378848
T94F	94	T	F	0.025496304	0.066734884	-3.905415104	0.006891669	0.017812158	-5.810993914	0.01651456	0.041230458	-4.600145711
T94G	94	T	G	0.024365086	0.063773994	-3.970887961	0.002005962	0.005184596	-7.591552785	0.002473708	0.006175891	-7.339136879
T94H	94	T	H	0.003317715	0.0086839	-6.847441246	0.015648434	0.040444832	-4.627900827	0.004926953	0.012300691	-6.345116792
T94I	94	T	I	0.021969546	0.057503828	-4.120198203	0.01039276	0.026861055	-5.218340242	0.005402752	0.013488577	-6.212118033
T94K	94	T	K	0.011331754	0.029660113	-5.075332099	0.010040271	0.025950012	-5.268120997	0.009834953	0.024554065	-5.347894275
T94L	94	T	L	0.009528246	0.024939551	-5.325420673	0.002680633	0.006928346	-7.173273309	0.003955715	0.009875886	-6.661874039
T94M	94	T	M	0.06927188	0.181314546	-2.463433424	0.047332843	0.122336128	-3.031077573	0.043794898	0.109338889	-3.193121479
T94N	94	T	N	0.02059475	0.05390539	-4.213426653	0.012763607	0.032988729	-4.92188301	0.013773159	0.03438624	-4.862024813
T94P	94	T	P	0.011708473	0.030646151	-5.028150322	0.00159541	0.004123485	-7.921920154	0.009248455	0.023089809	-5.436599923
T94Q	94	T	Q	0.007233307	0.018932699	-5.722976062	0.011150376	0.028819183	-5.116826758	0.009725549	0.024280928	-5.364032644
T94R	94	T	R	0.022313875	0.058405087	-4.097762151	0.008459186	0.021863553	-5.515328327	0.004706754	0.01175094	-6.411080061
T94S	94	T	S	0.134949867	0.353222316	-1.501351601	0.124521337	0.321836961	-1.635598073	0.359656545	0.897923022	-0.155336326
T94T	94	T	T	0.382053628	1	0	0.38690813	1	0	0.400542737	1	0
T94V	94	T	V	0.049345852	0.129159491	-2.952774431	0.006269192	0.016203309	-5.947567725	0.012665162	0.03162	-4.983018801
T94W	94	T	W	0.032605424	0.085342533	-3.550591267	0.019853499	0.051313211	-4.284525881	0.045880046	0.114544697	-3.126017426
T94Y	94	T	Y	0.025660633	0.067165004	-3.896146469	0.008283215	0.021408738	-5.54565644	0.010047508	0.025084733	-5.317046622
Q95A	95	Q	A	0.040123056	0.067701557	-3.884667177	0.016810946	0.026211367	-5.253663567	0.006458858	0.008482124	-6.881358643
Q95C	95	Q	C	0.014240494	0.024028669	-5.379099443	0.019761477	0.030811791	-5.02037365	0.014913082	0.019584672	-5.674131241
Q95D	95	Q	D	0.048501545	0.081838982	-3.611067984	0.020971392	0.032698272	-4.934641809	0.00912382	0.011981897	-6.382999811
Q95E	95	Q	E	0.011941989	0.020150291	-5.633055492	0.036910741	0.057550659	-4.119023738	0.017760538	0.023324106	-5.422034411
Q95F	95	Q	F	0.035815181	0.060432672	-4.048527454	0.039704535	0.061906699	-4.013760667	0.011943601	0.015684988	-5.994471801
Q95G	95	Q	G	0.006477301	0.01092946	-6.515634091	0.005437765	0.008478479	-6.8819788	0.004687759	0.00615622	-7.343739512
Q95H	95	Q	H	NA	NA	NA	NA	NA	NA	NA	NA	NA
Q95I	95	Q	I	0.015114219	0.025502947	-5.293192235	0.007192606	0.0112146	-6.478478006	0.009254526	0.012153547	-6.362478775
Q95K	95	Q	K	0.016980274	0.028651631	-5.125238942	0.016106894	0.025113621	-5.315386143	0.013572168	0.01782371	-5.810058529
Q95L	95	Q	L	0.018661478	0.031488406	-4.989035461	0.019475466	0.030365847	-5.041406597	0.003862571	0.005072538	-7.623076436
Q95M	95	Q	M	0.00982027	0.016570212	-5.915264135	0.014498036	0.022605115	-5.467206929	0.00442875	0.005816076	-7.425738217
Q95N	95	Q	N	0.04053836	0.068402319	-3.869810957	0.029540674	0.046059363	-4.440361728	0.005702458	0.007488778	-7.061053928
Q95P	95	Q	P	0.010547323	0.017797004	-5.812221787	0.023258876	0.036264881	-4.785283086	0.007945675	0.010434693	-6.582468005
Q95Q	95	Q	Q	0.59264599	1	0	0.641360879	1	0	0.761467062	1	0
Q95R	95	Q	R	0.011087426	0.018708346	-5.740174177	0.0095427	0.01487883	-6.070595093	0.012277901	0.016124008	-5.954645791
Q95S	95	Q	S	0.020838479	0.035161765	-4.829848712	0.00332644	0.005186534	-7.591013412	0.0223581	0.029361874	-5.08991216
Q95T	95	Q	T	0.019888996	0.033559657	-4.897128205	0.003643912	0.005681531	-7.459504491	0.003904182	0.005127184	-7.607617622
Q95V	95	Q	V	0.005024341	0.008477811	-6.882092525	0.018807292	0.02932404	-5.091772323	0.004466366	0.005865475	-7.413536409
Q95W	95	Q	W	0.022330354	0.037679077	-4.730092582	0.013073098	0.020383373	-5.616463373	0.011752309	0.015433772	-6.017765526
Q95Y	95	Q	Y	0.010723658	0.018094543	-5.788301527	0.018517916	0.02887285	-5.114142676	0.019825366	0.026035749	-5.263362252
E96A	96	E	A	0.067037867	0.343759054	-1.540530382	0.063180565	0.185968247	-2.426871782	0.042045674	0.092981796	-3.426907902
E96C	96	E	C	0.028148922	0.144342999	-2.792426964	0.022971558	0.067615418	-3.886503934	0.020717199	0.045814996	-4.448036311
E96D	96	E	D	NA	NA	NA	NA	NA	NA	NA	NA	NA
E96E	96	E	E	0.195014111	1	0	0.339738458	1	0	0.452192541	1	0
E96F	96	E	F	0.040744073	0.208928845	-2.258916409	0.027904431	0.082135037	-3.605858408	0.02168315	0.047951144	-4.382290953
E96G	96	E	G	0.002446642	0.012545974	-6.316631701	0.015607047	0.045938418	-4.444155021	0.003312955	0.007326427	-7.092674586
E96H	96	E	H	0.031618816	0.16213604	-2.624723284	0.027336347	0.080462917	-3.635532155	0.023122024	0.051133139	-4.289597606
E96I	96	E	I	0.004943149	0.025347646	-5.302004396	0.004031138	0.011865417	-6.397093442	0.026436555	0.058463049	-4.09633111
E96K	96	E	K	0.003630384	0.018616007	-5.747312555	0.026408904	0.077733043	-3.685328204	0.007313106	0.016172549	-5.950309143
E96L	96	E	L	0.052523135	0.269329921	-1.89255358	0.116778959	0.343731941	-1.540644178	0.027485522	0.060782784	-4.040193432
E96M	96	E	M	0.2128098	1.091253339	0.125986068	0.028570184	0.084094644	-3.57184228	0.154155513	0.340906802	-1.552550709
E96N	96	E	N	0.039457386	0.202330927	-2.305211236	0.020093532	0.05914412	-4.079621448	0.055893164	0.123604789	-3.01619345
E96P	96	E	P	0.00823948	0.042250688	-4.56488134	0.004725248	0.013908486	-6.167890774	0.006804657	0.01504814	-6.054270975
E96Q	96	E	Q	0.137185391	0.703463916	-0.507451672	0.071279491	0.209806954	-2.252865597	0.016235518	0.035903993	-4.799711889
E96R	96	E	R	0.02063572	0.105816548	-3.240362832	0.043126746	0.12694102	-2.977769752	0.008339574	0.018442528	-5.760819735
E96S	96	E	S	0.021186272	0.108639688	-3.202376855	0.041781639	0.122981776	-3.023483554	0.013089389	0.028946494	-5.110467587
E96T	96	E	T	0.009604599	0.049250791	-4.34370929	0.01148148	0.033795055	-4.887044024	0.002602749	0.005755841	-7.440757446
E96V	96	E	V	0.039221261	0.201120117	-2.313870698	0.048666918	0.143248186	-2.803411229	0.004400802	0.009732141	-6.683027072
E96W	96	E	W	0.014989106	0.076861648	-3.701592282	0.015262553	0.04492442	-4.476356313	0.023734367	0.052487304	-4.25188769
E96Y	96	E	Y	0.020076964	0.102951339	-3.279965504	0.015771035	0.046421105	-4.42907533	0.038759338	0.085714236	-3.544321347
C97A	97	C	A	0.160986275	0.443181029	-1.174031967	0.169392973	0.412480131	-1.277603469	0.014641033	0.024193167	-5.369256555
C97C	97	C	C	0.363251729	1	0	0.410669412	1	0	0.605172258	1	0
C97D	97	C	D	0.040354001	0.111091009	-3.17018604	0.037398244	0.091066544	-3.456935058	0.026829169	0.044333111	-4.495471591
C97E	97	C	E	0.038552801	0.106132463	-3.236062087	0.030703097	0.074763534	-3.741521417	0.042070638	0.069518451	-3.846460262
C97F	97	C	F	0.019785191	0.054466888	-4.198476761	0.02403104	0.058516751	-4.095006524	0.048494694	0.080133702	-3.641447054
C97G	97	C	G	0.016333516	0.04496473	-4.475062374	0.014851451	0.036164005	-4.789301719	0.007880241	0.013021484	-6.262962333
C97H	97	C	H	0.035363697	0.097353141	-3.360628665	0.019541898	0.047585473	-4.393334978	0.007619356	0.012590392	-6.311532986
C97I	97	C	I	0.025955463	0.071453103	-3.806859524	0.010751703	0.02618092	-5.255340376	0.012815358	0.021176381	-5.561400115
C97K	97	C	K	0.0114407	0.03149524	-4.988722403	0.015141114	0.036869348	-4.761434282	0.03700194	0.061142822	-4.031673045
C97L	97	C	L	0.014795564	0.040730884	-4.617733047	0.015644304	0.038094642	-4.714268084	0.003217461	0.005316604	-7.55527917
C97M	97	C	M	0.02821695	0.077678778	-3.686335685	0.022141639	0.053915967	-4.213143593	0.022004844	0.036361291	-4.781452784
C97N	97	C	N	0.014231176	0.039177174	-4.673842847	0.012309758	0.029974859	-5.060103214	0.02249851	0.037177035	-4.749444486
C97P	97	C	P	0.010418571	0.028681408	-5.123740339	0.003889582	0.009471322	-6.722218453	0.008056613	0.013312926	-6.231028507
C97Q	97	C	Q	0.036110904	0.099410136	-3.330463237	0.054199555	0.131978554	-2.921624582	0.012963367	0.021420954	-5.544833436
C97R	97	C	R	0.00262098	0.007215327	-7.114719508	0.006926686	0.016866818	-5.88966838	0.009156302	0.015130075	-6.046437028
C97S	97	C	S	0.062918187	0.173208225	-2.529420654	0.030724992	0.074816851	-3.740492938	0.019089662	0.031544178	-4.986482422
C97T	97	C	T	0.035983305	0.099058867	-3.335570072	0.020489448	0.049892803	-4.325024462	0.003047145	0.005035169	-7.633744027
C97V	97	C	V	0.004391335	0.012088958	-6.370166309	0.020525535	0.049980676	-4.322485771	0.006337498	0.010472221	-6.577288707
C97W	97	C	W	NA	NA	NA	NA	NA	NA	NA	NA	NA
C97Y	97	C	Y	0.022579908	0.062160496	-4.007858168	0.034898263	0.084978968	-3.556750367	0.040990073	0.067732901	-3.883999397
A98A	98	A	A	0.196135118	1	0	0.410015781	1	0	0.570547939	1	0
A98C	98	A	C	0.129361131	0.659551091	-0.600443676	0.12596866	0.307228808	-1.702614595	0.063292751	0.110933275	-3.172235925
A98D	98	A	D	0.084320283	0.429909157	-1.217896253	0.034397109	0.08389216	-3.5753202	0.042709891	0.074857672	-3.739706007
A98E	98	A	E	0.022827903	0.116388657	-3.102977629	0.007161913	0.017467409	-5.839190594	0.013100123	0.0229606	-5.444695865
A98F	98	A	F	0.003245357	0.016546535	-5.917327044	0.009011886	0.021979364	-5.50770655	0.035484992	0.062194585	-4.007067213
A98G	98	A	G	0.007963558	0.040602409	-4.622290861	0.003307493	0.008066746	-6.953797456	0.013609475	0.023853342	-5.389664764
A98H	98	A	H	0.009780071	0.049863948	-4.325859089	0.022526621	0.054940863	-4.185976618	0.013107443	0.022973429	-5.443889961
A98I	98	A	I	0.023263584	0.118609986	-3.075702617	0.035382081	0.086294438	-3.534588609	0.01881479	0.032976704	-4.922408993
A98K	98	A	K	0.071687711	0.365501661	-1.452050132	0.015352799	0.037444411	-4.739105785	0.030489389	0.053438785	-4.225968976
A98L	98	A	L	0.041050915	0.209299157	-2.256361591	0.040635627	0.099107472	-3.334862362	0.021788203	0.038188207	-4.71072899
A98M	98	A	M	0.180232724	0.918921231	-0.121986895	0.052260091	0.12745873	-2.971897903	0.017151496	0.030061447	-5.055941752
A98N	98	A	N	0.048013869	0.244799957	-2.030324789	0.016385209	0.039962387	-4.645213415	0.013309161	0.023326982	-5.421856552
A98P	98	A	P	0.0030905	0.015756996	-5.987863702	0.010082894	0.024591477	-5.345697775	0.010843719	0.019005799	-5.71741651
A98Q	98	A	Q	0.010816181	0.055146579	-4.180584799	0.051275639	0.12505772	-2.999333973	0.010700486	0.018754754	-5.73659985
A98R	98	A	R	0.033583516	0.171226431	-2.546022678	0.004096578	0.009991268	-6.645116472	0.006468076	0.011336603	-6.462867755
A98S	98	A	S	0.004003531	0.020412105	-5.614431243	0.024732505	0.060320861	-4.051199167	0.035715494	0.062598586	-3.997726115
A98T	98	A	T	0.071053761	0.362269449	-1.464864951	0.05660413	0.138053541	-2.856700206	0.013349055	0.023396903	-5.417538619
A98V	98	A	V	0.025708296	0.131074413	-2.931542006	0.043390044	0.105825303	-3.240243478	0.014156039	0.024811305	-5.332858544
A98W	98	A	W	0.022412245	0.114269415	-3.129488781	0.010672401	0.026029245	-5.263722727	0.022584114	0.039583201	-4.658967892
A98Y	98	A	Y	0.011449746	0.058376828	-4.098460374	0.026740538	0.065218314	-3.938579049	0.032777362	0.057448918	-4.121576458
N99A	99	N	A	0.060737277	0.192091218	-2.380136532	0.049633228	0.099778534	-3.325126711	0.011910994	0.03311834	-4.916225842
N99C	99	N	C	0.058562306	0.18521253	-2.432746389	0.017852757	0.035889706	-4.800286103	0.270312096	0.751598728	-0.41196547
N99D	99	N	D	0.076860387	0.243083099	-2.040478506	0.050109035	0.100735058	-3.311362235	0.026385979	0.07336582	-3.768748102
N99E	99	N	E	0.014075768	0.044516838	-4.489505074	0.050233401	0.100985073	-3.307786041	0.016079034	0.044707513	-4.483338902
N99F	99	N	F	0.017355202	0.054888563	-4.187350626	0.025613221	0.0514907	-4.279544307	0.026488704	0.073651443	-3.763142397
N99G	99	N	G	0.03157549	0.099862467	-3.323913646	0.036723133	0.073825148	-3.759743854	0.007126824	0.019816027	-5.657188428
N99H	99	N	H	0.014933315	0.047228964	-4.404184307	0.0405104	0.081438756	-3.618140672	0.025695347	0.071445526	-3.807012518
N99I	99	N	I	0.018983677	0.060038872	-4.057959319	0.01502665	0.030208334	-5.048909547	0.013644541	0.03793844	-4.720195819
N99K	99	N	K	NA	NA	NA	NA	NA	NA	NA	NA	NA
N99L	99	N	L	0.060263811	0.190593808	-2.391426849	0.025608799	0.051481811	-4.27979338	0.023512009	0.065374787	-3.935121852
N99M	99	N	M	0.119967888	0.37941737	-1.398142369	0.0183233	0.036835646	-4.762753631	0.07524428	0.209215591	-2.256937729
N99N	99	N	N	0.316189763	1	0	0.497433923	1	0	0.359649486	1	0
N99P	99	N	P	0.006066836	0.019187326	-5.703702511	0.004010498	0.008062373	-6.954579765	0.004096943	0.011391489	-6.455899821
N99Q	99	N	Q	0.026184261	0.082811857	-3.59401884	0.009214287	0.018523641	-5.754488509	0.0060225	0.016745471	-5.900085275
N99R	99	N	R	0.042215578	0.133513424	-2.904943294	0.008882942	0.017857531	-5.807323525	0.00517859	0.014398992	-6.117888394
N99S	99	N	S	0.023693755	0.074935238	-3.738211896	0.040836501	0.082094322	-3.606573746	0.030075717	0.08362508	-3.5799205
N99T	99	N	T	0.032459227	0.102657426	-3.284090109	0.029220603	0.058742682	-4.089447042	0.007779616	0.021631106	-5.530748785
N99V	99	N	V	0.003663919	0.011587722	-6.431259149	0.007402224	0.014880819	-6.070402252	0.005626598	0.015644671	-5.998184876
N99W	99	N	W	0.005889207	0.018625547	-5.746573413	0.014579821	0.029310066	-5.092459976	0.014768686	0.04106411	-4.60597815
N99Y	99	N	Y	0.024092817	0.076197334	-3.714115677	0.010530101	0.021168844	-5.561913711	0.024674502	0.068607081	-3.865498694
V100A	100	V	A	0.005926078	0.024717384	-5.338330139	0.021953939	0.067026437	-3.899125946	0.004133381	0.007268317	-7.104162851
V100C	100	V	C	0.267878684	1.117309024	0.16002826	0.081434634	0.248623876	-2.007963246	0.049866968	0.08768825	-3.511472652
V100D	100	V	D	0.023682259	0.098777554	-3.339672944	0.012256579	0.037419929	-4.740049364	0.005020579	0.008828405	-6.823631479
V100E	100	V	E	0.012427833	0.05183589	-4.269904859	0.018633598	0.056889277	-4.135699439	0.009677044	0.017016535	-5.876918866
V100F	100	V	F	0.061674467	0.257241216	-1.958806283	0.007354152	0.022452581	-5.476974861	0.075783573	0.133261139	-2.907671969
V100G	100	V	G	0.008854776	0.036932841	-4.758951938	0.029976751	0.09152047	-3.449761726	0.007710248	0.013558035	-6.204708045
V100H	100	V	H	0.027386257	0.114226752	-3.130027521	0.011128236	0.033975042	-4.879380835	0.009937562	0.017474643	-5.838593239
V100I	100	V	I	0.061208135	0.255296169	-1.969756205	0.028050549	0.085639682	-3.545576746	0.064030816	0.112594579	-3.150790732
V100K	100	V	K	0.006465375	0.026966764	-5.212673776	0.006757487	0.020630933	-5.599047096	0.005010664	0.008810969	-6.826483533
V100L	100	V	L	0.038783559	0.161764347	-2.628034421	0.017659802	0.05391623	-4.213136575	0.025978507	0.04568174	-4.452238596
V100M	100	V	M	NA	NA	NA	NA	NA	NA	NA	NA	NA
V100N	100	V	N	0.013804279	0.057576982	-4.118364031	0.011904459	0.036344889	-4.782103706	0.047893816	0.084218573	-3.569717751
V100P	100	V	P	0.013673842	0.057032934	-4.132060933	0.008383743	0.025595972	-5.287939375	0.004616149	0.008117238	-6.94479538
V100Q	100	V	Q	0.006957862	0.029020905	-5.106763687	0.168611769	0.514779885	-0.957972414	0.015592736	0.027418947	-5.188683049
V100R	100	V	R	0.00831851	0.034696105	-4.849082491	0.011892757	0.036309163	-4.783522529	0.004084171	0.007181785	-7.121441777
V100S	100	V	S	0.016614424	0.06929796	-3.851043311	0.020569842	0.062800723	-3.993075013	0.002791639	0.004908939	-7.67037293
V100T	100	V	T	0.100725728	0.420122137	-1.25111929	0.056148845	0.171425138	-2.544349412	0.01238354	0.021775757	-5.521133305
V100V	100	V	V	0.239753442	1	0	0.327541488	1	0	0.568684718	1	0
V100W	100	V	W	0.007627214	0.031812742	-4.974251476	0.007195545	0.021968348	-5.508429824	0.009601489	0.016883677	-5.888227052
[truncated: 15,021 more rows]
